# Supplementary material for: Systematic Analysis of Transcriptional and Post-transcriptional Regulation of Metabolism in Yeast
Source: PLoS Comput Biol. 2017 Jan 10;13(1):e1005297. doi: 10.1371/journal.pcbi.1005297 (PMC5224888; doi:10.1371/journal.pcbi.1005297)
Supplement: S3 Table — (XLSX) [file pcbi.1005297.s007.xlsx]

## Sheet: Description
Supplementary Table 3. Putative regulatory interactions between metabolites and Kinases/Phosphatases and Transcription-factors. Metabolites are provided with the respective ion m/z used to measure it, and proteins with gene id within brackets. abs_coef represents the average absolute coefficient value of the linear regression models, and it is used to sort the list in a descending order. Higher a…
Spreadsheet	Description
Metabolites and transcription-factors associations	Metabolites and transcription-factor associations extracted from the time-resolved experiments.
Metabolites and kinases/phosphatases associations	Metabolites and kinases/phosphatases associations extracted from the time-resolved experiments.

## Sheet: Metabolites and transcription-f
Metabolites	ion	Transcription-factors	feature	coef	coef (abs)	cor	pval	fdr
Inosine	267.07	YAP1	YML007W	0.38882	0.38882	0.588141	0.0102507	0.0237443
L-Glutamine	145.06	PDR3	YBL005W	-0.381718	0.381718	-0.969989	3.01174e-11	1.91848e-08
L-Glutamine	145.06	LEU3	YLR451W	0.37652	0.37652	0.440203	0.0675196	0.110747
L-Glutamine	145.06	RDS1	YCR106W	-0.3256	0.3256	-0.87553	1.94646e-06	2.77044e-05
L-Saccharopine	275.12	RTG3	YBL103C	-0.31381	0.31381	-0.771456	0.000177405	0.000904058
gamma-Amino-gamma-cyanobutanoate	127.05	PDR3	YBL005W	-0.310593	0.310593	-0.975075	6.92646e-12	9.67428e-09
Inosine	267.07	RTG3	YBL103C	-0.305977	0.305977	-0.724321	0.000675339	0.00249627
2-(Formamido)-N1-(5-phospho-D-ribosyl)acetamidine	312.06	ROX1	YPR065W	-0.300588	0.300588	-0.928087	2.86545e-08	3.23514e-06
Inosine	267.07	SNT2	YGL131C	0.290794	0.290794	0.301294	0.224367	0.299417
gamma-Amino-gamma-cyanobutanoate	127.05	LEU3	YLR451W	0.28733	0.28733	0.431269	0.0739492	0.119862
dUDP	387	PDR3	YBL005W	-0.284612	0.284612	-0.973852	1.01248e-11	9.67428e-09
Inosine	267.07	PDR1	YGL013C	0.273178	0.273178	0.58631	0.0105489	0.0241715
dUDP	387	LEU3	YLR451W	0.231058	0.231058	0.397711	0.102163	0.157067
L-Glutamine	145.06	SNT2	YGL131C	-0.22537	0.22537	-0.498841	0.0350884	0.0643512
2-(Formamido)-N1-(5-phospho-D-ribosyl)acetamidine	312.06	PDR3	YBL005W	-0.216346	0.216346	-0.943259	4.51806e-09	1.07925e-06
gamma-Amino-gamma-cyanobutanoate	127.05	PUT3	YKL015W	-0.208185	0.208185	-0.662611	0.00273028	0.00826874
L-Proline	114.06	SNT2	YGL131C	0.19865	0.19865	0.563681	0.0148397	0.0314398
L-Glutamine	145.06	XBP1	YIL101C	-0.198102	0.198102	-0.865834	3.43583e-06	4.07818e-05
gamma-Amino-gamma-cyanobutanoate	127.05	XBP1	YIL101C	-0.195386	0.195386	-0.87544	1.95714e-06	2.77044e-05
L-Glutamine	145.06	PUT3	YKL015W	-0.188337	0.188337	-0.673134	0.00220053	0.00693928
gamma-Amino-gamma-cyanobutanoate	127.05	RDS1	YCR106W	-0.183051	0.183051	-0.874417	2.08252e-06	2.86309e-05
Inosine	267.07	YAP5	YIR018W	0.165595	0.165595	0.612031	0.00694318	0.0174289
dUDP	387	RDS1	YCR106W	-0.163707	0.163707	-0.879597	1.51219e-06	2.34943e-05
L-Glutamine	145.06	MOT3	YMR070W	-0.162148	0.162148	-0.664834	0.00261044	0.00798168
But-1-ene-1,2,4-tricarboxylate	187.02	PDR3	YBL005W	-0.159069	0.159069	-0.91874	7.3908e-08	4.74233e-06
L-Proline	114.06	ROX1	YPR065W	0.158177	0.158177	0.84031	1.27183e-05	0.000117414
dUDP	387	MSN4	YKL062W	-0.158029	0.158029	-0.951789	1.26101e-09	6.02448e-07
gamma-Amino-gamma-cyanobutanoate	127.05	OPI1	YHL020C	-0.155903	0.155903	-0.890729	7.21638e-07	1.58512e-05
L-Proline	114.06	REB1	YBR049C	-0.154306	0.154306	-0.888576	8.37651e-07	1.75907e-05
dUDP	387	XBP1	YIL101C	-0.154252	0.154252	-0.897121	4.54916e-07	1.20742e-05
gamma-Amino-gamma-cyanobutanoate	127.05	ADR1	YDR216W	-0.154068	0.154068	-0.770336	0.000183776	0.000928503
gamma-Amino-gamma-cyanobutanoate	127.05	SNT2	YGL131C	-0.152882	0.152882	-0.483316	0.0421604	0.0744627
L-Glutamine	145.06	MSN4	YKL062W	-0.15233	0.15233	-0.944161	3.98558e-09	1.07925e-06
L-Citrulline	174.09	LEU3	YLR451W	0.1506	0.1506	0.474564	0.046599	0.0803707
L-Saccharopine	275.12	RPN4	YDL020C	-0.149626	0.149626	-0.881243	1.36184e-06	2.34538e-05
L-Glutamine	145.06	ADR1	YDR216W	-0.146634	0.146634	-0.785404	0.000112431	0.000647156
gamma-Amino-gamma-cyanobutanoate	127.05	MOT3	YMR070W	-0.146279	0.146279	-0.667482	0.00247333	0.00761118
gamma-Amino-gamma-cyanobutanoate	127.05	MSN4	YKL062W	-0.145462	0.145462	-0.948512	2.1118e-09	8.07129e-07
L-Citrulline	174.09	ROX1	YPR065W	-0.145407	0.145407	-0.869579	2.77349e-06	3.47503e-05
2-(Formamido)-N1-(5-phospho-D-ribosyl)acetamidine	312.06	REB1	YBR049C	0.143886	0.143886	0.88462	1.0932e-06	2.13174e-05
Hypoxanthine	135.03	YAP5	YIR018W	0.141651	0.141651	0.733089	0.000537688	0.00209698
gamma-Amino-gamma-cyanobutanoate	127.05	ARR1	YPR199C	0.14114	0.14114	0.238241	0.341091	0.415175
L-Proline	114.06	PDR3	YBL005W	0.138995	0.138995	0.933571	1.54591e-08	2.27249e-06
L-Citrulline	174.09	RTG3	YBL103C	-0.13252	0.13252	-0.402779	0.097472	0.15046
L-Saccharopine	275.12	PDR1	YGL013C	0.131838	0.131838	0.703118	0.00113388	0.00386647
dUDP	387	OPI1	YHL020C	-0.131175	0.131175	-0.920942	5.97495e-08	4.22894e-06
L-Citrulline	174.09	PDR3	YBL005W	-0.124655	0.124655	-0.878994	1.57075e-06	2.3823e-05
dUDP	387	SUT1	YGL162W	-0.122438	0.122438	-0.911773	1.39551e-07	5.33364e-06
Fumarate	115	SNT2	YGL131C	0.118856	0.118856	0.665904	0.00255429	0.00783506
L-Saccharopine	275.12	PHD1	YKL043W	0.117483	0.117483	0.728129	0.000612318	0.00231253
gamma-Amino-gamma-cyanobutanoate	127.05	GAT1	YFL021W	-0.115929	0.115929	-0.5608	0.0154731	0.0324934
dUDP	387	REB1	YBR049C	0.114934	0.114934	0.857223	5.49321e-06	6.06794e-05
dUDP	387	ADR1	YDR216W	-0.113991	0.113991	-0.761263	0.000242863	0.00114879
Ornithine	131.08	RTG3	YBL103C	-0.113224	0.113224	-0.475797	0.0459531	0.0796159
Fumarate	115	LEU3	YLR451W	-0.112839	0.112839	-0.678401	0.00196911	0.00625079
dUDP	387	SNT2	YGL131C	-0.111841	0.111841	-0.437059	0.069733	0.113897
L-Proline	114.06	BAS1	YKR099W	-0.111663	0.111663	-0.849366	8.21582e-06	8.48672e-05
2-(Formamido)-N1-(5-phospho-D-ribosyl)acetamidine	312.06	PDR1	YGL013C	0.110053	0.110053	0.549467	0.0181755	0.0371203
Inosine	267.07	DAL80	YKR034W	0.109975	0.109975	0.506643	0.0318985	0.0594133
Xanthosine 5-phosphate	363.03	PDR1	YGL013C	0.109431	0.109431	0.350718	0.153595	0.221524
dUDP	387	PUT3	YKL015W	-0.106851	0.106851	-0.614964	0.00660519	0.0169203
Ornithine	131.08	PDR3	YBL005W	-0.103299	0.103299	-0.854747	6.25188e-06	6.71199e-05
Fumarate	115	PUT3	YKL015W	0.102238	0.102238	0.81739	3.4445e-05	0.000262472
Fumarate	115	PDR3	YBL005W	0.102065	0.102065	0.826061	2.40293e-05	0.000199652
NAD	662.1	HAP4	YKL109W	-0.0989848	0.0989848	-0.803066	6.00514e-05	0.0004029
L-Saccharopine	275.12	ROX1	YPR065W	-0.0989241	0.0989241	-0.852049	7.17908e-06	7.49684e-05
L-Glutamine	145.06	OPI1	YHL020C	-0.0969819	0.0969819	-0.87623	1.86492e-06	2.7276e-05
dUDP	387	MOT3	YMR070W	-0.0957123	0.0957123	-0.671841	0.00226064	0.00707051
2-(Formamido)-N1-(5-phospho-D-ribosyl)acetamidine	312.06	HAP4	YKL109W	-0.0955056	0.0955056	-0.80305	6.00871e-05	0.0004029
Hypoxanthine	135.03	YAP1	YML007W	0.0945701	0.0945701	0.770954	0.000180239	0.000913625
L-Proline	114.06	ARR1	YPR199C	-0.0942323	0.0942323	-0.36445	0.137034	0.201751
L-Glutamine	145.06	GAT1	YFL021W	-0.093827	0.093827	-0.552776	0.0173507	0.0356147
2-(Formamido)-N1-(5-phospho-D-ribosyl)acetamidine	312.06	ADR1	YDR216W	-0.0911194	0.0911194	-0.621307	0.00591954	0.0155175
NAD	662.1	PDR1	YGL013C	0.0903058	0.0903058	0.623339	0.00571256	0.0150992
L-Proline	114.06	PUT3	YKL015W	0.0891993	0.0891993	0.694758	0.00137465	0.00458458
Pyruvate	87.01	ROX1	YPR065W	0.0890384	0.0890384	0.857988	5.27558e-06	5.93037e-05
Xanthine	151.03	ECM22	YLR228C	0.0887677	0.0887677	0.140698	0.577625	0.636448
gamma-Amino-gamma-cyanobutanoate	127.05	SUT1	YGL162W	-0.0880456	0.0880456	-0.883796	1.15411e-06	2.20551e-05
L-Proline	114.06	LEU3	YLR451W	-0.0875691	0.0875691	-0.507914	0.0314011	0.0586584
NAD	662.1	GAT1	YFL021W	-0.0869695	0.0869695	-0.740737	0.0004376	0.00179454
gamma-Amino-gamma-cyanobutanoate	127.05	ROX1	YPR065W	-0.0855729	0.0855729	-0.823467	2.68162e-05	0.00021586
gamma-Amino-gamma-cyanobutanoate	127.05	REB1	YBR049C	0.0847656	0.0847656	0.846026	9.68357e-06	9.53882e-05
NAD	662.1	RTG3	YBL103C	-0.084471	0.084471	-0.525802	0.025014	0.0483824
L-Glutamine	145.06	REB1	YBR049C	0.0843851	0.0843851	0.835226	1.60679e-05	0.000142156
Inosine	267.07	MAC1	YMR021C	0.083998	0.083998	0.2068	0.410311	0.481637
2-(Formamido)-N1-(5-phospho-D-ribosyl)acetamidine	312.06	HAP2	YGL237C	0.0827324	0.0827324	0.926169	3.51538e-08	3.3932e-06
2-(Formamido)-N1-(5-phospho-D-ribosyl)acetamidine	312.06	ASH1	YKL185W	-0.0826807	0.0826807	-0.916626	9.0151e-08	4.74233e-06
dUDP	387	ARR1	YPR199C	0.0823984	0.0823984	0.180778	0.472841	0.539785
2-(Formamido)-N1-(5-phospho-D-ribosyl)acetamidine	312.06	BAS1	YKR099W	0.0820798	0.0820798	0.880457	1.43193e-06	2.34538e-05
Inosine	267.07	SMP1	YBR182C	0.0819725	0.0819725	0.516753	0.0281043	0.0530704
L-Glutamine	145.06	SUT1	YGL162W	-0.0813728	0.0813728	-0.874972	2.01372e-06	2.80277e-05
Ornithine	131.08	ROX1	YPR065W	-0.0811982	0.0811982	-0.899424	3.8241e-07	1.12429e-05
O-Phospho-L-serine	184	RPN4	YDL020C	0.0810341	0.0810341	0.767866	0.000198506	0.00099305
Ornithine	131.08	LEU3	YLR451W	0.0806708	0.0806708	0.429581	0.0752132	0.121498
L-Proline	114.06	MOT3	YMR070W	0.0801945	0.0801945	0.620381	0.00601583	0.0157053
Xanthine	151.03	YAP1	YML007W	0.0790424	0.0790424	0.66026	0.0028619	0.00861274
L-Glutamine	145.06	STE12	YHR084W	-0.0782881	0.0782881	-0.923509	4.6263e-08	3.53635e-06
L-Citrulline	174.09	MOT3	YMR070W	-0.0767222	0.0767222	-0.62807	0.00525331	0.0141234
L-Glutamine	145.06	ARR1	YPR199C	0.0742203	0.0742203	0.239389	0.338699	0.41279
Xanthine	151.03	GAL4	YPL248C	0.0731932	0.0731932	0.70653	0.00104625	0.00360901
Ornithine	131.08	PDR1	YGL013C	0.0730645	0.0730645	0.528124	0.0242658	0.0471739
Xanthine	151.03	SMP1	YBR182C	0.0730357	0.0730357	0.634547	0.00467373	0.0129255
dUDP	387	GAT1	YFL021W	-0.0723815	0.0723815	-0.595776	0.00907965	0.0216608
Fumarate	115	ARR1	YPR199C	-0.0722978	0.0722978	-0.547608	0.0186524	0.0379603
Inosine	267.07	PHD1	YKL043W	0.0711063	0.0711063	0.149399	0.554066	0.616546
2-(Formamido)-N1-(5-phospho-D-ribosyl)acetamidine	312.06	OPI1	YHL020C	-0.0706803	0.0706803	-0.914155	1.12978e-07	4.79778e-06
Ornithine	131.08	PUT3	YKL015W	-0.0688019	0.0688019	-0.540422	0.0205886	0.0411988
Dethiobiotin	213.12	RPN4	YDL020C	-0.068793	0.068793	-0.721743	0.000721004	0.00262686
Inosine	267.07	ADR1	YDR216W	0.0684739	0.0684739	0.388199	0.111403	0.168693
Fumarate	115	MOT3	YMR070W	0.0679876	0.0679876	0.520802	0.0266869	0.0509477
Inosine	267.07	THI2	YBR240C	0.0678237	0.0678237	0.172423	0.493871	0.560444
Hypoxanthine	135.03	REB1	YBR049C	0.0664675	0.0664675	0.714379	0.000865891	0.00306429
2-(Formamido)-N1-(5-phospho-D-ribosyl)acetamidine	312.06	YAP5	YIR018W	0.0656154	0.0656154	0.671987	0.00225376	0.00706056
Xanthosine 5-phosphate	363.03	SNT2	YGL131C	0.0652523	0.0652523	0.326066	0.186668	0.256082
gamma-Amino-gamma-cyanobutanoate	127.05	STE12	YHR084W	-0.0651945	0.0651945	-0.925911	3.61179e-08	3.3932e-06
Ornithine	131.08	YAP1	YML007W	0.0644264	0.0644264	0.755813	0.00028551	0.00129749
Inosine	267.07	DAL82	YNL314W	0.0639601	0.0639601	0.223677	0.372268	0.443519
dUDP	387	ROX1	YPR065W	-0.0626978	0.0626978	-0.840713	1.24806e-05	0.000116344
L-Citrulline	174.09	GAT1	YFL021W	-0.062689	0.062689	-0.621835	0.0058652	0.0153962
Xanthosine 5-phosphate	363.03	DAL80	YKR034W	0.0623874	0.0623874	0.783843	0.00011851	0.000678063
2-(Formamido)-N1-(5-phospho-D-ribosyl)acetamidine	312.06	UME6	YDR207C	-0.0618175	0.0618175	-0.909591	1.68484e-07	5.64866e-06
Inosine	267.07	SKN7	YHR206W	0.0605068	0.0605068	0.0409577	0.871809	0.894271
Hypoxanthine	135.03	DAL82	YNL314W	0.0589935	0.0589935	0.251749	0.313573	0.388863
L-Glutamine	145.06	YAP1	YML007W	0.0587595	0.0587595	0.576002	0.0123593	0.0273681
gamma-Amino-gamma-cyanobutanoate	127.05	CIN5	YOR028C	-0.0583599	0.0583599	-0.923761	4.50924e-08	3.53635e-06
4-Aminobutanoate	102.06	LEU3	YLR451W	0.058353	0.058353	0.646149	0.00376609	0.0108226
Hypoxanthine	135.03	LEU3	YLR451W	0.0582198	0.0582198	0.636015	0.00454991	0.0126563
Pyruvate	87.01	YAP1	YML007W	-0.0579999	0.0579999	-0.749078	0.000346768	0.00150266
L-Glutamine	145.06	CIN5	YOR028C	-0.0575997	0.0575997	-0.914723	1.07328e-07	4.74233e-06
Fumarate	115	REB1	YBR049C	-0.0573028	0.0573028	-0.793375	8.53422e-05	0.000534718
dUDP	387	CIN5	YOR028C	-0.0571094	0.0571094	-0.944352	3.88049e-09	1.07925e-06
Dethiobiotin	213.12	YAP5	YIR018W	0.0570571	0.0570571	0.631705	0.00492128	0.0134935
2-(Formamido)-N1-(5-phospho-D-ribosyl)acetamidine	312.06	MSN4	YKL062W	-0.0565624	0.0565624	-0.894469	5.5287e-07	1.29464e-05
L-Proline	114.06	XBP1	YIL101C	0.0553804	0.0553804	0.779079	0.000138818	0.00075489
L-Saccharopine	275.12	YAP5	YIR018W	0.0547394	0.0547394	0.699351	0.00123763	0.00416393
2-(Formamido)-N1-(5-phospho-D-ribosyl)acetamidine	312.06	LEU3	YLR451W	0.0543658	0.0543658	0.379947	0.119887	0.179268
L-Saccharopine	275.12	HAP2	YGL237C	0.0532357	0.0532357	0.869301	2.81857e-06	3.47503e-05
But-1-ene-1,2,4-tricarboxylate	187.02	PUT3	YKL015W	-0.0526429	0.0526429	-0.744875	0.000390322	0.00164659
But-1-ene-1,2,4-tricarboxylate	187.02	SNT2	YGL131C	-0.0514861	0.0514861	-0.562474	0.0151026	0.0318585
2-Oxoadipate	159.03	YAP1	YML007W	-0.0509927	0.0509927	-0.530193	0.0236135	0.0461406
gamma-Amino-gamma-cyanobutanoate	127.05	UME6	YDR207C	-0.0504957	0.0504957	-0.8534	6.70119e-06	7.11443e-05
2-(Formamido)-N1-(5-phospho-D-ribosyl)acetamidine	312.06	HAP3	YBL021C	-0.0500477	0.0500477	-0.857231	5.49085e-06	6.06794e-05
L-Proline	114.06	MSN4	YKL062W	0.0493774	0.0493774	0.879754	1.49731e-06	2.34538e-05
L-Citrulline	174.09	PUT3	YKL015W	-0.048713	0.048713	-0.569938	0.013535	0.0293258
Xanthosine 5-phosphate	363.03	YAP7	YOL028C	0.0482405	0.0482405	0.73249	0.000546273	0.00212612
2-(Formamido)-N1-(5-phospho-D-ribosyl)acetamidine	312.06	YAP1	YML007W	0.0475513	0.0475513	0.703074	0.00113506	0.00386647
Xanthine	151.03	YAP5	YIR018W	0.0471122	0.0471122	0.670842	0.00230799	0.00718334
dUDP	387	STE12	YHR084W	-0.0468199	0.0468199	-0.938307	8.685e-09	1.6015e-06
Hypoxanthine	135.03	DAL80	YKR034W	0.0464368	0.0464368	0.440517	0.0673018	0.110493
2-(Formamido)-N1-(5-phospho-D-ribosyl)acetamidine	312.06	PUT3	YKL015W	-0.0456168	0.0456168	-0.547225	0.0187518	0.0380815
Hypoxanthine	135.03	CAD1	YDR423C	0.0447034	0.0447034	0.428152	0.076296	0.122936
O-Phospho-L-serine	184	LEU3	YLR451W	0.0443003	0.0443003	0.335747	0.173159	0.243673
Dethiobiotin	213.12	LEU3	YLR451W	-0.0433044	0.0433044	-0.353799	0.149765	0.216491
Dethiobiotin	213.12	PDR1	YGL013C	0.0429389	0.0429389	0.560815	0.0154698	0.0324934
Xanthosine 5-phosphate	363.03	LEU3	YLR451W	0.0420577	0.0420577	0.326285	0.186354	0.255898
Xanthine	151.03	PDR1	YGL013C	0.0412013	0.0412013	0.530234	0.0236007	0.0461406
But-1-ene-1,2,4-tricarboxylate	187.02	ADR1	YDR216W	-0.0411704	0.0411704	-0.7426	0.000415749	0.00172477
L-Proline	114.06	YAP1	YML007W	-0.0411359	0.0411359	-0.692741	0.0014387	0.00478981
gamma-Amino-gamma-cyanobutanoate	127.05	ASH1	YKL185W	-0.0409558	0.0409558	-0.896863	4.63741e-07	1.21399e-05
L-Citrulline	174.09	YAP1	YML007W	0.0406158	0.0406158	0.744586	0.000393476	0.0016526
L-Proline	114.06	MCM1	YMR043W	0.0403127	0.0403127	0.294999	0.234676	0.309713
NAD	662.1	PDR3	YBL005W	-0.0399489	0.0399489	-0.876059	1.88458e-06	2.72835e-05
Hypoxanthine	135.03	GAL4	YPL248C	0.0394335	0.0394335	0.721747	0.000720923	0.00262686
Deoxycytidine	226.08	YAP1	YML007W	0.0393465	0.0393465	0.718863	0.000775041	0.00279982
dUDP	387	RAP1	YNL216W	0.0391247	0.0391247	0.913704	1.17636e-07	4.88701e-06
Xanthosine 5-phosphate	363.03	SKN7	YHR206W	0.0391233	0.0391233	0.311306	0.208582	0.281311
Dethiobiotin	213.12	HAP4	YKL109W	-0.0390599	0.0390599	-0.444379	0.0646608	0.106892
Dethiobiotin	213.12	PUT3	YKL015W	0.0389896	0.0389896	0.0926185	0.71472	0.757952
Xanthine	151.03	YAP6	YDR259C	0.0389378	0.0389378	0.611523	0.00700321	0.0175401
L-Citrulline	174.09	ADR1	YDR216W	-0.0381856	0.0381856	-0.562236	0.0151547	0.031895
gamma-Amino-gamma-cyanobutanoate	127.05	YAP3	YHL009C	0.0379141	0.0379141	0.667889	0.00245279	0.00758461
dUDP	387	UME6	YDR207C	-0.0378938	0.0378938	-0.884176	1.12566e-06	2.17286e-05
L-Citrulline	174.09	HAP4	YKL109W	-0.0365664	0.0365664	-0.707037	0.00103373	0.00357225
Ornithine	131.08	ADR1	YDR216W	-0.0365287	0.0365287	-0.500204	0.0345143	0.0634811
Xanthosine 5-phosphate	363.03	MET31	YPL038W	-0.0359668	0.0359668	-0.547464	0.0186896	0.0379956
L-Proline	114.06	RDS1	YCR106W	0.0350899	0.0350899	0.748978	0.000347752	0.00150352
Ornithine	131.08	GAT1	YFL021W	-0.0350159	0.0350159	-0.590859	0.00982066	0.0229149
L-Citrulline	174.09	REB1	YBR049C	0.0349975	0.0349975	0.82467	2.5491e-05	0.000208177
Dethiobiotin	213.12	SMP1	YBR182C	0.0347814	0.0347814	0.449413	0.061335	0.102368
Deoxycytidine	226.08	GCR1	YPL075W	0.0345289	0.0345289	0.810054	4.60519e-05	0.00033462
O-Phospho-L-serine	184	SMP1	YBR182C	-0.0345239	0.0345239	-0.477013	0.0453227	0.0788814
Deoxycytidine	226.08	SNT2	YGL131C	-0.0341649	0.0341649	-0.549636	0.0181326	0.0370999
Hypoxanthine	135.03	MOT3	YMR070W	-0.0340154	0.0340154	-0.216166	0.388948	0.461951
But-1-ene-1,2,4-tricarboxylate	187.02	SKN7	YHR206W	-0.0339835	0.0339835	-0.574243	0.0126916	0.0278457
Fumarate	115	SKN7	YHR206W	0.033797	0.033797	0.446404	0.0633073	0.105383
dUDP	387	MBP1	YDL056W	-0.0332276	0.0332276	-0.928046	2.87793e-08	3.23514e-06
Xanthine	151.03	PHD1	YKL043W	0.0332044	0.0332044	0.137831	0.585477	0.642277
L-Proline	114.06	GCR1	YPL075W	-0.0329771	0.0329771	-0.895124	5.27115e-07	1.29464e-05
Deoxycytidine	226.08	YAP6	YDR259C	0.0326411	0.0326411	0.805627	5.45512e-05	0.000375381
2-(Formamido)-N1-(5-phospho-D-ribosyl)acetamidine	312.06	TEC1	YBR083W	-0.0324961	0.0324961	-0.865835	3.43564e-06	4.07818e-05
2-Oxoadipate	159.03	MOT3	YMR070W	0.0320908	0.0320908	0.50758	0.0315311	0.0588438
L-Glutamine	145.06	UGA3	YDL170W	-0.0320497	0.0320497	-0.750461	0.000333354	0.0014611
dUDP	387	ASH1	YKL185W	-0.0318985	0.0318985	-0.917827	8.05777e-08	4.74233e-06
gamma-Amino-gamma-cyanobutanoate	127.05	RAP1	YNL216W	0.0318591	0.0318591	0.888036	8.69175e-07	1.80543e-05
L-Glutamine	145.06	ROX1	YPR065W	-0.0314861	0.0314861	-0.798135	7.19784e-05	0.000463133
Xanthine	151.03	REB1	YBR049C	0.0314273	0.0314273	0.629352	0.00513415	0.0139168
L-Glutamine	145.06	YAP3	YHL009C	0.0313363	0.0313363	0.655069	0.00317105	0.00938062
Deoxycytidine	226.08	RPN4	YDL020C	-0.0309519	0.0309519	-0.638521	0.00434469	0.0122098
2-(Formamido)-N1-(5-phospho-D-ribosyl)acetamidine	312.06	ARR1	YPR199C	0.0308882	0.0308882	0.168401	0.504155	0.571029
2-(Formamido)-N1-(5-phospho-D-ribosyl)acetamidine	312.06	XBP1	YIL101C	-0.0305566	0.0305566	-0.866558	3.29817e-06	3.98912e-05
NAD	662.1	YAP1	YML007W	0.0301718	0.0301718	0.636731	0.00449047	0.0125092
Hypoxanthine	135.03	SMP1	YBR182C	0.0297621	0.0297621	0.678105	0.00198154	0.0062798
Xanthine	151.03	NRG1	YDR043C	0.029718	0.029718	-0.0486649	0.847932	0.873881
But-1-ene-1,2,4-tricarboxylate	187.02	ABF1	YKL112W	0.029273	0.029273	0.793129	8.60853e-05	0.000537611
Ornithine	131.08	SKN7	YHR206W	0.0291027	0.0291027	-0.446785	0.063055	0.105055
Ornithine	131.08	RDS1	YCR106W	-0.0290107	0.0290107	-0.622246	0.00582318	0.015328
2-Oxoadipate	159.03	MCM1	YMR043W	0.0288934	0.0288934	0.347439	0.157745	0.225636
L-Proline	114.06	UME6	YDR207C	0.0287641	0.0287641	0.824918	2.52249e-05	0.000206888
L-Citrulline	174.09	PDR1	YGL013C	0.0283547	0.0283547	0.429997	0.0749007	0.121096
Inosine	267.07	YAP7	YOL028C	0.0283098	0.0283098	0.392304	0.107345	0.163456
dUDP	387	PDR1	YGL013C	0.0277617	0.0277617	0.442476	0.0659523	0.108745
Xanthine	151.03	ARR1	YPR199C	0.0274832	0.0274832	0.482341	0.0426382	0.0751675
2-(Formamido)-N1-(5-phospho-D-ribosyl)acetamidine	312.06	DAL82	YNL314W	0.0273915	0.0273915	-0.504333	0.0328189	0.0610087
L-Citrulline	174.09	UME6	YDR207C	-0.0271168	0.0271168	-0.821109	2.95847e-05	0.000230609
Xanthine	151.03	GAT1	YFL021W	0.0268491	0.0268491	0.167502	0.506466	0.573035
L-Glutamine	145.06	ASH1	YKL185W	-0.026835	0.026835	-0.883303	1.19194e-06	2.25524e-05
2-(Formamido)-N1-(5-phospho-D-ribosyl)acetamidine	312.06	GAT1	YFL021W	-0.0266732	0.0266732	-0.609039	0.00730232	0.0181702
L-Proline	114.06	RAP1	YNL216W	-0.0263251	0.0263251	-0.842152	1.16626e-05	0.000110333
Ornithine	131.08	HAP4	YKL109W	-0.02629	0.02629	-0.691548	0.00147774	0.00490273
L-Glutamine	145.06	SWI5	YDR146C	-0.0262585	0.0262585	-0.749982	0.000337946	0.00147784
Deoxycytidine	226.08	MOT3	YMR070W	0.0262295	0.0262295	-0.151351	0.54884	0.612995
2-(Formamido)-N1-(5-phospho-D-ribosyl)acetamidine	312.06	ABF1	YKL112W	0.0262147	0.0262147	0.758563	0.000263261	0.00122348
gamma-Amino-gamma-cyanobutanoate	127.05	YAP1	YML007W	0.0257529	0.0257529	0.597572	0.00882039	0.0212825
O-Phospho-L-serine	184	PHD1	YKL043W	-0.025693	0.025693	-0.574038	0.0127307	0.0278996
L-Saccharopine	275.12	YAP1	YML007W	0.0254777	0.0254777	0.570321	0.0134582	0.0291926
dUDP	387	YAP1	YML007W	0.0253532	0.0253532	0.595897	0.00906194	0.0216467
Dethiobiotin	213.12	PHD1	YKL043W	0.0250519	0.0250519	0.574352	0.0126709	0.0278323
L-Glutamine	145.06	UME6	YDR207C	-0.0249399	0.0249399	-0.838	1.4158e-05	0.000128785
2-(Formamido)-N1-(5-phospho-D-ribosyl)acetamidine	312.06	MOT3	YMR070W	-0.0248046	0.0248046	-0.658318	0.00297452	0.00888173
L-Proline	114.06	PHD1	YKL043W	-0.0246184	0.0246184	-0.542055	0.0201355	0.040419
Xanthosine 5-phosphate	363.03	PUT3	YKL015W	-0.0245555	0.0245555	0.0157228	0.950626	0.960173
Fumarate	115	MCM1	YMR043W	0.0245288	0.0245288	0.164586	0.513999	0.579841
Inosine	267.07	ECM22	YLR228C	-0.024305	0.024305	-0.321064	0.193914	0.264694
Inosine	267.07	GAT1	YFL021W	0.0240993	0.0240993	-0.142515	0.57267	0.631855
gamma-Amino-gamma-cyanobutanoate	127.05	ZAP1	YJL056C	-0.0239654	0.0239654	-0.888703	8.30392e-07	1.75907e-05
Deoxycytidine	226.08	YAP5	YIR018W	0.0234926	0.0234926	0.736562	0.000490097	0.00195936
L-Proline	114.06	GAL4	YPL248C	-0.0232124	0.0232124	-0.360112	0.142126	0.207806
Hypoxanthine	135.03	BAS1	YKR099W	0.023046	0.023046	0.730676	0.000572976	0.00218992
L-Glutamine	145.06	RAP1	YNL216W	0.0230358	0.0230358	0.876679	1.81413e-06	2.68744e-05
L-Citrulline	174.09	SNT2	YGL131C	-0.022836	0.022836	-0.359412	0.142959	0.208705
gamma-Amino-gamma-cyanobutanoate	127.05	PDR1	YGL013C	0.0227475	0.0227475	0.380837	0.11895	0.178426
2-Oxoadipate	159.03	CBF1	YJR060W	0.0226762	0.0226762	0.210319	0.402212	0.474462
dUDP	387	NRG1	YDR043C	-0.0225595	0.0225595	-0.880832	1.39812e-06	2.34538e-05
dUDP	387	BAS1	YKR099W	0.0225135	0.0225135	0.822245	2.82221e-05	0.000223973
Ornithine	131.08	CBF1	YJR060W	-0.022486	0.022486	0.468097	0.0501002	0.0857899
2-(Formamido)-N1-(5-phospho-D-ribosyl)acetamidine	312.06	CBF1	YJR060W	-0.0223678	0.0223678	0.603504	0.00800626	0.0195652
gamma-Amino-gamma-cyanobutanoate	127.05	SWI5	YDR146C	-0.0223676	0.0223676	-0.745957	0.000378687	0.00160459
2-(Formamido)-N1-(5-phospho-D-ribosyl)acetamidine	312.06	RTG3	YBL103C	-0.0221237	0.0221237	-0.332139	0.178114	0.249177
dUDP	387	UGA3	YDL170W	-0.0220543	0.0220543	-0.782029	0.000125924	0.000703628
L-Glutamine	145.06	MBP1	YDL056W	-0.0219662	0.0219662	-0.898491	4.10492e-07	1.14313e-05
NAD	662.1	HAP2	YGL237C	0.0218743	0.0218743	0.917768	8.10271e-08	4.74233e-06
gamma-Amino-gamma-cyanobutanoate	127.05	BAS1	YKR099W	0.0218687	0.0218687	0.805326	5.51738e-05	0.000376561
Fumarate	115	ROX1	YPR065W	0.0215434	0.0215434	0.649236	0.00355065	0.0102342
dUDP	387	PHO2	YDL106C	-0.0215232	0.0215232	-0.863272	3.96362e-06	4.61858e-05
Pyruvate	87.01	MOT3	YMR070W	0.0210137	0.0210137	0.628867	0.00517897	0.0139986
Ornithine	131.08	ARR1	YPR199C	0.0209873	0.0209873	0.235436	0.346974	0.419929
Ornithine	131.08	MOT3	YMR070W	-0.0208948	0.0208948	-0.585978	0.0106037	0.0242679
Inosine	267.07	CRZ1	YNL027W	0.0208932	0.0208932	0.396839	0.102987	0.158045
Ornithine	131.08	HAP2	YGL237C	0.0208009	0.0208009	0.900257	3.58763e-07	1.07661e-05
Inosine	267.07	LEU3	YLR451W	-0.020747	0.020747	0.0619473	0.807087	0.841431
2-(Formamido)-N1-(5-phospho-D-ribosyl)acetamidine	312.06	STB4	YMR019W	-0.0207267	0.0207267	-0.863763	3.85744e-06	4.52244e-05
Inosine	267.07	ROX1	YPR065W	-0.0204915	0.0204915	-0.479047	0.0442833	0.0774248
2-(Formamido)-N1-(5-phospho-D-ribosyl)acetamidine	312.06	CIN5	YOR028C	-0.0203983	0.0203983	-0.912401	1.32072e-07	5.15082e-06
Hypoxanthine	135.03	HAP2	YGL237C	0.0202718	0.0202718	0.680995	0.00186276	0.00598275
L-Saccharopine	275.12	HAP4	YKL109W	-0.020269	0.020269	-0.584037	0.0109286	0.0246926
NAD	662.1	RDS1	YCR106W	-0.0199594	0.0199594	-0.766287	0.000208437	0.00103461
But-1-ene-1,2,4-tricarboxylate	187.02	MOT3	YMR070W	-0.0197371	0.0197371	-0.596007	0.00904599	0.0216357
L-Proline	114.06	ADR1	YDR216W	0.0196728	0.0196728	0.67163	0.00227055	0.00708992
L-Glutamine	145.06	DAL82	YNL314W	0.0195787	0.0195787	-0.58961	0.0100165	0.0233023
Pyruvate	87.01	SWI5	YDR146C	-0.0194256	0.0194256	0.207687	0.40826	0.479524
gamma-Amino-gamma-cyanobutanoate	127.05	PHO2	YDL106C	-0.0193805	0.0193805	-0.84417	1.05924e-05	0.000101398
But-1-ene-1,2,4-tricarboxylate	187.02	RTG3	YBL103C	-0.0191615	0.0191615	-0.124345	0.623006	0.676098
Deoxycytidine	226.08	SMP1	YBR182C	0.0188946	0.0188946	0.591002	0.00979846	0.022891
But-1-ene-1,2,4-tricarboxylate	187.02	RLM1	YPL089C	-0.018819	0.018819	0.435986	0.0705009	0.114955
Pyruvate	87.01	MCM1	YMR043W	0.0187962	0.0187962	0.344921	0.160982	0.229238
NAD	662.1	MSN4	YKL062W	-0.0187107	0.0187107	-0.861412	4.38915e-06	5.02256e-05
gamma-Amino-gamma-cyanobutanoate	127.05	DAL82	YNL314W	0.0186497	0.0186497	-0.586963	0.0104418	0.0240704
Hypoxanthine	135.03	RLM1	YPL089C	-0.0185827	0.0185827	-0.0531447	0.834109	0.862545
dUDP	387	ZAP1	YJL056C	-0.018507	0.018507	-0.916467	9.14877e-08	4.74233e-06
L-Glutamine	145.06	HAP4	YKL109W	0.0181454	0.0181454	-0.812789	4.13866e-05	0.000307742
Ornithine	131.08	XBP1	YIL101C	-0.018095	0.018095	-0.746243	0.000375662	0.00159671
gamma-Amino-gamma-cyanobutanoate	127.05	MBP1	YDL056W	-0.0180939	0.0180939	-0.905869	2.29872e-07	7.32142e-06
Hypoxanthine	135.03	PDR1	YGL013C	0.0178871	0.0178871	0.391504	0.108128	0.164124
dUDP	387	YAP3	YHL009C	0.0178489	0.0178489	0.708903	0.000988713	0.00345417
Deoxycytidine	226.08	GAL4	YPL248C	0.0178136	0.0178136	0.498394	0.0352782	0.0646372
2-(Formamido)-N1-(5-phospho-D-ribosyl)acetamidine	312.06	SKO1	YNL167C	-0.0177676	0.0177676	-0.804922	5.60212e-05	0.000380984
Deoxycytidine	226.08	ARR1	YPR199C	0.0177292	0.0177292	0.388814	0.110788	0.167895
NAD	662.1	LEU3	YLR451W	0.0175488	0.0175488	0.192789	0.44341	0.514173
Deoxycytidine	226.08	MCM1	YMR043W	0.0175248	0.0175248	0.138213	0.584428	0.642033
L-Proline	114.06	YAP3	YHL009C	-0.017326	0.017326	-0.629113	0.00515619	0.0139568
Ornithine	131.08	ECM22	YLR228C	-0.0170901	0.0170901	-0.522519	0.0261029	0.0500327
dUDP	387	YHP1	YDR451C	-0.0170822	0.0170822	-0.827571	2.25239e-05	0.000188786
Inosine	267.07	MOT3	YMR070W	-0.0169051	0.0169051	-0.0460688	0.855962	0.879905
2-Oxoadipate	159.03	RTG3	YBL103C	0.0168964	0.0168964	0.411113	0.0900985	0.141014
Hypoxanthine	135.03	SKN7	YHR206W	-0.0168116	0.0168116	-0.236262	0.345237	0.418621
Inosine	267.07	RLM1	YPL089C	0.0167694	0.0167694	-0.178748	0.477909	0.544365
NAD	662.1	UME6	YDR207C	-0.0166799	0.0166799	-0.940812	6.28383e-09	1.33427e-06
L-Glutamine	145.06	BAS1	YKR099W	0.016518	0.016518	0.789778	9.67862e-05	0.000579807
Ornithine	131.08	UME6	YDR207C	-0.016353	0.016353	-0.826765	2.33168e-05	0.000194578
Xanthosine 5-phosphate	363.03	CBF1	YJR060W	-0.016294	0.016294	-0.421685	0.0813372	0.129422
Dethiobiotin	213.12	RTG3	YBL103C	-0.0162599	0.0162599	-0.535273	0.0220708	0.0435716
L-Citrulline	174.09	ABF1	YKL112W	0.0162236	0.0162236	0.671202	0.00229081	0.00714151
NAD	662.1	ROX1	YPR065W	-0.0161017	0.0161017	-0.910424	1.56884e-07	5.40978e-06
dUDP	387	AZF1	YOR113W	-0.0160868	0.0160868	-0.871426	2.48948e-06	3.32686e-05
Fumarate	115	CBF1	YJR060W	0.0159713	0.0159713	-0.496337	0.0361624	0.0658022
Inosine	267.07	MCM1	YMR043W	0.0158503	0.0158503	0.161363	0.522386	0.588955
Xanthine	151.03	LEU3	YLR451W	0.0158145	0.0158145	0.556608	0.0164327	0.0341336
Deoxycytidine	226.08	CBF1	YJR060W	0.0157088	0.0157088	0.625835	0.00546641	0.0146102
gamma-Amino-gamma-cyanobutanoate	127.05	GCR1	YPL075W	0.015694	0.015694	0.882026	1.29497e-06	2.34538e-05
Inosine	267.07	CAD1	YDR423C	0.0156229	0.0156229	0.396579	0.103233	0.158076
dUDP	387	HAP4	YKL109W	-0.0155384	0.0155384	-0.825713	2.4388e-05	0.000200885
gamma-Amino-gamma-cyanobutanoate	127.05	CBF1	YJR060W	-0.0154219	0.0154219	0.718558	0.000780964	0.00281589
L-Citrulline	174.09	HAP2	YGL237C	0.0154063	0.0154063	0.84675	9.34769e-06	9.40181e-05
gamma-Amino-gamma-cyanobutanoate	127.05	SIP4	YJL089W	0.0153637	0.0153637	0.751267	0.000325751	0.00143106
Xanthosine 5-phosphate	363.03	ECM22	YLR228C	-0.0153549	0.0153549	0.0205587	0.935466	0.946361
NAD	662.1	NRG1	YDR043C	-0.0153269	0.0153269	-0.873854	2.1544e-06	2.9199e-05
Dethiobiotin	213.12	SNT2	YGL131C	0.0153186	0.0153186	0.100522	0.691463	0.739444
Ornithine	131.08	YAP5	YIR018W	0.015256	0.015256	0.705199	0.00107976	0.00371787
Xanthine	151.03	DAL80	YKR034W	0.0151534	0.0151534	0.323895	0.18979	0.259806
Fumarate	115	ECM22	YLR228C	-0.0150413	0.0150413	0.184838	0.462787	0.530844
L-Saccharopine	275.12	STB4	YMR019W	-0.0150032	0.0150032	-0.879801	1.49283e-06	2.34538e-05
2-(Formamido)-N1-(5-phospho-D-ribosyl)acetamidine	312.06	AZF1	YOR113W	-0.0149542	0.0149542	-0.848147	8.72796e-06	8.82494e-05
L-Proline	114.06	SIP4	YJL089W	-0.0149153	0.0149153	-0.670526	0.00232314	0.00721874
dUDP	387	FKH2	YNL068C	0.0147129	0.0147129	0.92214	5.30824e-08	3.90155e-06
Hypoxanthine	135.03	ROX1	YPR065W	-0.0146632	0.0146632	-0.58657	0.0105061	0.0241115
L-Citrulline	174.09	RLM1	YPL089C	-0.0145824	0.0145824	0.330549	0.180327	0.251241
Xanthosine 5-phosphate	363.03	YAP5	YIR018W	0.014518	0.014518	0.216626	0.387915	0.461011
NAD	662.1	OPI1	YHL020C	-0.0143022	0.0143022	-0.931321	2.00348e-08	2.73476e-06
Fumarate	115	GAT1	YFL021W	0.0141849	0.0141849	0.305093	0.218289	0.293149
Ornithine	131.08	OPI1	YHL020C	-0.0141039	0.0141039	-0.816057	3.63447e-05	0.000273444
L-Saccharopine	275.12	YAP3	YHL009C	0.0140616	0.0140616	0.72365	0.000686979	0.00253439
gamma-Amino-gamma-cyanobutanoate	127.05	AZF1	YOR113W	-0.0136512	0.0136512	-0.849201	8.28376e-06	8.5109e-05
O-Phospho-L-serine	184	ADR1	YDR216W	-0.0136095	0.0136095	0.124337	0.623029	0.676098
Dethiobiotin	213.12	ADR1	YDR216W	0.0135701	0.0135701	-0.0912098	0.718891	0.761109
Inosine	267.07	PUT3	YKL015W	0.013395	0.013395	0.0856436	0.735445	0.774345
Inosine	267.07	CBF1	YJR060W	-0.0133677	0.0133677	-0.105635	0.676555	0.725938
Hypoxanthine	135.03	MCM1	YMR043W	0.0133309	0.0133309	0.238829	0.339864	0.413945
L-Glutamine	145.06	AZF1	YOR113W	-0.0133175	0.0133175	-0.837905	1.42196e-05	0.000128785
4-Aminobutanoate	102.06	SKO1	YNL167C	0.0132635	0.0132635	0.321565	0.19318	0.264068
L-Proline	114.06	ECM22	YLR228C	-0.013205	0.013205	0.353656	0.149942	0.216584
2-Oxoadipate	159.03	RLM1	YPL089C	0.0132015	0.0132015	0.0478756	0.850372	0.874629
Pyruvate	87.01	BAS1	YKR099W	-0.0130573	0.0130573	-0.739132	0.000457191	0.00186288
dUDP	387	HAP1	YLR256W	0.0129245	0.0129245	0.878101	1.66106e-06	2.47992e-05
But-1-ene-1,2,4-tricarboxylate	187.02	PDR1	YGL013C	-0.0129243	0.0129243	0.224413	0.370655	0.442425
Ornithine	131.08	DAL82	YNL314W	0.0129206	0.0129206	-0.333558	0.176154	0.246796
NAD	662.1	ECM22	YLR228C	-0.0129031	0.0129031	-0.63792	0.00439321	0.0123281
NAD	662.1	ASH1	YKL185W	-0.0128675	0.0128675	-0.934696	1.35331e-08	2.15515e-06
Hypoxanthine	135.03	ECM22	YLR228C	0.0128651	0.0128651	-0.191771	0.445868	0.516396
Xanthosine 5-phosphate	363.03	GAL4	YPL248C	0.0128174	0.0128174	0.597223	0.00887028	0.021349
L-Citrulline	174.09	SKN7	YHR206W	0.0125632	0.0125632	-0.481983	0.0428145	0.0754088
Dethiobiotin	213.12	RLM1	YPL089C	0.0124943	0.0124943	0.368237	0.132696	0.19633
4-Aminobutanoate	102.06	SMP1	YBR182C	-0.0122578	0.0122578	-0.187881	0.455321	0.525434
Dethiobiotin	213.12	PDR3	YBL005W	0.0122563	0.0122563	-0.261909	0.293773	0.370805
L-Glutamine	145.06	RIM101	YHL027W	-0.0121546	0.0121546	-0.620479	0.0060056	0.0157
Hypoxanthine	135.03	ARR1	YPR199C	0.0121432	0.0121432	0.476498	0.0455891	0.0791287
2-Oxoadipate	159.03	SMP1	YBR182C	0.0120575	0.0120575	0.079685	0.75329	0.791825
4-Aminobutanoate	102.06	PHD1	YKL043W	-0.012026	0.012026	-0.425675	0.0781985	0.125367
2-(Formamido)-N1-(5-phospho-D-ribosyl)acetamidine	312.06	SUT1	YGL162W	-0.0120015	0.0120015	-0.875056	2.0034e-06	2.80277e-05
Xanthine	151.03	ROX1	YPR065W	-0.0118459	0.0118459	-0.444666	0.0644675	0.106664
L-Glutamine	145.06	TEC1	YBR083W	-0.0118266	0.0118266	-0.829975	2.02929e-05	0.0001732
Ornithine	131.08	REB1	YBR049C	0.01176	0.01176	0.829965	2.03018e-05	0.0001732
Hypoxanthine	135.03	UME6	YDR207C	-0.0117103	0.0117103	-0.40182	0.0983474	0.151688
Pyruvate	87.01	ECM22	YLR228C	-0.0116039	0.0116039	0.374016	0.12626	0.187769
L-Glutamine	145.06	ZAP1	YJL056C	-0.0115767	0.0115767	-0.87409	2.12398e-06	2.89923e-05
Fumarate	115	BAS1	YKR099W	-0.0115391	0.0115391	-0.729583	0.000589599	0.00224447
L-Citrulline	174.09	ARR1	YPR199C	0.0114585	0.0114585	0.227177	0.364634	0.436328
gamma-Amino-gamma-cyanobutanoate	127.05	SFP1	YLR403W	0.0113932	0.0113932	0.891538	6.81788e-07	1.53202e-05
Deoxycytidine	226.08	SFP1	YLR403W	0.0113781	0.0113781	0.775561	0.000155636	0.000819338
Fumarate	115	ADR1	YDR216W	0.0113692	0.0113692	0.615291	0.00656833	0.0168711
Dethiobiotin	213.12	ECM22	YLR228C	0.01132	0.01132	-0.240986	0.335389	0.409381
Xanthosine 5-phosphate	363.03	GZF3	YJL110C	0.011267	0.011267	0.423679	0.079758	0.127333
L-Citrulline	174.09	ASH1	YKL185W	-0.0112358	0.0112358	-0.798797	7.02669e-05	0.000458294
Pyruvate	87.01	REB1	YBR049C	-0.0110374	0.0110374	-0.709675	0.000970562	0.0034032
But-1-ene-1,2,4-tricarboxylate	187.02	YAP5	YIR018W	0.0110344	0.0110344	0.58656	0.0105078	0.0241115
L-Citrulline	174.09	XBP1	YIL101C	-0.0108335	0.0108335	-0.727375	0.000624396	0.00234424
But-1-ene-1,2,4-tricarboxylate	187.02	DAL82	YNL314W	0.0108036	0.0108036	-0.406222	0.094375	0.14627
Dethiobiotin	213.12	SKN7	YHR206W	0.0107158	0.0107158	0.0143394	0.954966	0.962521
L-Glutamine	145.06	YHP1	YDR451C	-0.0106828	0.0106828	-0.796131	7.73692e-05	0.000489578
NAD	662.1	RAP1	YNL216W	0.0106539	0.0106539	0.898945	3.96611e-07	1.14155e-05
L-Saccharopine	275.12	UME6	YDR207C	-0.0105684	0.0105684	-0.845043	1.01562e-05	9.90226e-05
dUDP	387	GAL4	YPL248C	0.0105172	0.0105172	0.242632	0.331997	0.405916
Fumarate	115	UME6	YDR207C	0.0104862	0.0104862	0.589567	0.0100233	0.0233023
L-Glutamine	145.06	MCM1	YMR043W	-0.0102274	0.0102274	-0.389268	0.110336	0.167343
Ornithine	131.08	HAP3	YBL021C	-0.0101259	0.0101259	-0.787824	0.000103531	0.00061253
L-Glutamine	145.06	HAP1	YLR256W	0.0100052	0.0100052	0.845119	1.01189e-05	9.90226e-05
L-Proline	114.06	OPI1	YHL020C	0.00999324	0.00999324	0.817172	3.47491e-05	0.000262472
L-Saccharopine	275.12	HAP3	YBL021C	-0.00993932	0.00993932	-0.844346	1.05035e-05	0.000101374
L-Proline	114.06	SUT1	YGL162W	0.00988361	0.00988361	0.808384	4.91145e-05	0.000347622
2-Oxoadipate	159.03	GAT1	YFL021W	0.00986457	0.00986457	0.489954	0.0390149	0.0699413
Xanthosine 5-phosphate	363.03	YAP3	YHL009C	-0.00984229	0.00984229	-0.341635	0.165274	0.23458
O-Phospho-L-serine	184	RLM1	YPL089C	-0.00978062	0.00978062	-0.496274	0.0361899	0.0658022
gamma-Amino-gamma-cyanobutanoate	127.05	FKH1	YIL131C	-0.00961529	0.00961529	-0.848334	8.64741e-06	8.79e-05
Ornithine	131.08	STB4	YMR019W	-0.00960741	0.00960741	-0.801112	6.45592e-05	0.000428377
L-Glutamine	145.06	RLM1	YPL089C	-0.00958643	0.00958643	0.618191	0.00624872	0.0162147
L-Proline	114.06	TEC1	YBR083W	0.00957205	0.00957205	0.759829	0.000253526	0.00118168
gamma-Amino-gamma-cyanobutanoate	127.05	HAP3	YBL021C	-0.00953005	0.00953005	-0.782506	0.00012394	0.000696614
L-Glutamine	145.06	FKH2	YNL068C	0.00946069	0.00946069	0.886103	9.90489e-07	1.97169e-05
Hypoxanthine	135.03	TYE7	YOR344C	0.00944639	0.00944639	0.295477	0.233883	0.30888
Ornithine	131.08	SNT2	YGL131C	-0.00929274	0.00929274	-0.289682	0.243616	0.319526
O-Phospho-L-serine	184	MCM1	YMR043W	0.00922702	0.00922702	0.510564	0.0303829	0.056979
Fumarate	115	PDR1	YGL013C	0.00919984	0.00919984	-0.11067	0.661987	0.711506
Xanthine	151.03	DAL82	YNL314W	0.00918196	0.00918196	0.205025	0.41443	0.485279
4-Aminobutanoate	102.06	RPN4	YDL020C	0.00916947	0.00916947	0.459877	0.0548333	0.0927314
dUDP	387	MCM1	YMR043W	-0.00912961	0.00912961	-0.418572	0.0838497	0.132537
NAD	662.1	YAP3	YHL009C	0.00896835	0.00896835	0.792143	8.91235e-05	0.00055156
But-1-ene-1,2,4-tricarboxylate	187.02	MCM1	YMR043W	0.00890073	0.00890073	-0.246052	0.325013	0.400194
O-Phospho-L-serine	184	SKO1	YNL167C	0.00886783	0.00886783	0.685821	0.00167752	0.00550816
NAD	662.1	INO2	YDR123C	-0.0088416	0.0088416	-0.914533	1.0919e-07	4.74233e-06
2-Oxoadipate	159.03	GZF3	YJL110C	0.00883388	0.00883388	0.349988	0.154513	0.222345
gamma-Amino-gamma-cyanobutanoate	127.05	RIM101	YHL027W	-0.00881499	0.00881499	-0.622658	0.00578122	0.0152595
2-Oxoadipate	159.03	UME6	YDR207C	0.00870744	0.00870744	0.412663	0.0887724	0.139167
L-Glutamine	145.06	RTG3	YBL103C	0.00851673	0.00851673	-0.0739972	0.770436	0.808069
L-Glutamine	145.06	GCR1	YPL075W	0.0084775	0.0084775	0.871024	2.54903e-06	3.35944e-05
Dethiobiotin	213.12	MCM1	YMR043W	0.00846713	0.00846713	-0.267995	0.282284	0.35939
gamma-Amino-gamma-cyanobutanoate	127.05	SPT23	YKL020C	-0.00840888	0.00840888	-0.880454	1.43226e-06	2.34538e-05
Inosine	267.07	HAP2	YGL237C	0.00840234	0.00840234	0.545647	0.0191658	0.0387575
4-Aminobutanoate	102.06	MCM1	YMR043W	0.00838179	0.00838179	0.438949	0.0683962	0.11182
Dethiobiotin	213.12	MOT3	YMR070W	0.00828539	0.00828539	-0.158919	0.52879	0.594073
L-Proline	114.06	HAP2	YGL237C	-0.00825613	0.00825613	-0.837521	1.44729e-05	0.000129931
L-Citrulline	174.09	CBF1	YJR060W	-0.00824519	0.00824519	0.440127	0.0675723	0.110747
Hypoxanthine	135.03	GAT1	YFL021W	0.00817306	0.00817306	-0.0645017	0.799283	0.835117
gamma-Amino-gamma-cyanobutanoate	127.05	TEC1	YBR083W	-0.00812787	0.00812787	-0.842502	1.14703e-05	0.000109054
Fumarate	115	GAL4	YPL248C	-0.00807772	0.00807772	-0.349501	0.155126	0.22273
But-1-ene-1,2,4-tricarboxylate	187.02	GZF3	YJL110C	0.00798483	0.00798483	-0.137272	0.587015	0.643595
2-Oxoadipate	159.03	ABF1	YKL112W	0.00782668	0.00782668	0.03743	0.882775	0.902526
NAD	662.1	CBF1	YJR060W	-0.00782468	0.00782468	0.57138	0.0132478	0.0288015
L-Saccharopine	275.12	SPT2	YER161C	-0.00782339	0.00782339	-0.713413	0.000886578	0.00312592
L-Citrulline	174.09	BAS1	YKR099W	0.00781703	0.00781703	0.824137	2.60706e-05	0.000211106
Xanthosine 5-phosphate	363.03	XBP1	YIL101C	-0.00780793	0.00780793	0.292754	0.238424	0.313577
dUDP	387	INO2	YDR123C	-0.00772193	0.00772193	-0.910302	1.58528e-07	5.40978e-06
Dethiobiotin	213.12	HAP2	YGL237C	0.00766327	0.00766327	0.567628	0.0140056	0.0300728
Xanthine	151.03	MCM1	YMR043W	0.00763954	0.00763954	0.355063	0.148214	0.214574
2-(Formamido)-N1-(5-phospho-D-ribosyl)acetamidine	312.06	SMP1	YBR182C	-0.00751873	0.00751873	0.357535	0.145211	0.211185
dUDP	387	HAP2	YGL237C	0.00751793	0.00751793	0.84627	9.56946e-06	9.53882e-05
Inosine	267.07	HAP4	YKL109W	-0.00747648	0.00747648	-0.00654322	0.979443	0.982012
NAD	662.1	MOT3	YMR070W	-0.00739944	0.00739944	-0.636767	0.00448753	0.0125092
NAD	662.1	REB1	YBR049C	0.00739152	0.00739152	0.785939	0.000110411	0.000637446
L-Saccharopine	275.12	AZF1	YOR113W	-0.00738825	0.00738825	-0.772365	0.000172378	0.000883147
L-Proline	114.06	GAT1	YFL021W	0.00737483	0.00737483	0.465813	0.0513832	0.0874384
Deoxycytidine	226.08	LEU3	YLR451W	0.00727378	0.00727378	0.427565	0.0767437	0.123449
4-Aminobutanoate	102.06	SIP4	YJL089W	-0.00724926	0.00724926	-0.334231	0.17523	0.245862
NAD	662.1	PUT3	YKL015W	-0.00719017	0.00719017	-0.335458	0.173553	0.243867
gamma-Amino-gamma-cyanobutanoate	127.05	HAP4	YKL109W	-0.00718108	0.00718108	-0.820032	3.09269e-05	0.000239277
gamma-Amino-gamma-cyanobutanoate	127.05	MCM1	YMR043W	-0.00711212	0.00711212	-0.391989	0.107653	0.163663
dUDP	387	THI2	YBR240C	-0.00707383	0.00707383	-0.647828	0.00364762	0.0104979
O-Phospho-L-serine	184	SNT2	YGL131C	-0.00699387	0.00699387	-0.113768	0.653078	0.704171
dUDP	387	SWI5	YDR146C	-0.00688199	0.00688199	-0.773163	0.00016806	0.000865666
gamma-Amino-gamma-cyanobutanoate	127.05	RFX1	YLR176C	-0.00678811	0.00678811	-0.898825	4.00231e-07	1.14155e-05
L-Citrulline	174.09	DAL82	YNL314W	0.00675857	0.00675857	-0.349498	0.15513	0.22273
L-Glutamine	145.06	RFX1	YLR176C	-0.00667642	0.00667642	-0.886326	9.75775e-07	1.96285e-05
Xanthosine 5-phosphate	363.03	SMP1	YBR182C	0.00665965	0.00665965	0.311711	0.20796	0.280856
Pyruvate	87.01	HAP4	YKL109W	0.00664576	0.00664576	0.625482	0.00550061	0.0146606
Inosine	267.07	SKO1	YNL167C	-0.0066449	0.0066449	-0.191233	0.447168	0.517275
L-Glutamine	145.06	PHO2	YDL106C	-0.006635	0.006635	-0.844132	1.0612e-05	0.000101398
But-1-ene-1,2,4-tricarboxylate	187.02	MSN4	YKL062W	-0.00662112	0.00662112	-0.853437	6.68835e-06	7.11443e-05
Xanthine	151.03	RTG3	YBL103C	0.00661024	0.00661024	-0.0865997	0.732594	0.772619
4-Aminobutanoate	102.06	PDR3	YBL005W	-0.00650471	0.00650471	-0.0374507	0.882711	0.902526
L-Citrulline	174.09	MSN4	YKL062W	-0.00640353	0.00640353	-0.779748	0.000135798	0.00074572
Ornithine	131.08	CAD1	YDR423C	0.00638701	0.00638701	-0.164999	0.51293	0.578977
Hypoxanthine	135.03	PUT3	YKL015W	-0.0063122	0.0063122	-0.558723	0.0159428	0.0332243
dUDP	387	FKH1	YIL131C	-0.0063101	0.0063101	-0.879285	1.54223e-06	2.35776e-05
gamma-Amino-gamma-cyanobutanoate	127.05	FKH2	YNL068C	0.00630394	0.00630394	0.895433	5.1535e-07	1.29464e-05
L-Glutamine	145.06	SIP4	YJL089W	0.00628696	0.00628696	0.740935	0.000435241	0.00179023
2-(Formamido)-N1-(5-phospho-D-ribosyl)acetamidine	312.06	YAP3	YHL009C	0.00627194	0.00627194	0.715687	0.000838524	0.00297847
dUDP	387	SFP1	YLR403W	0.00625535	0.00625535	0.915095	1.03759e-07	4.74233e-06
Pyruvate	87.01	YAP3	YHL009C	-0.00624737	0.00624737	-0.591791	0.00967671	0.0227177
L-Proline	114.06	DAL82	YNL314W	-0.00622707	0.00622707	0.420708	0.08212	0.130342
Dethiobiotin	213.12	YAP1	YML007W	0.00616047	0.00616047	0.254544	0.308049	0.386599
Ornithine	131.08	NRG1	YDR043C	-0.00615799	0.00615799	-0.716029	0.000831487	0.0029645
NAD	662.1	SUT1	YGL162W	-0.00615518	0.00615518	-0.909293	1.72811e-07	5.69383e-06
L-Glutamine	145.06	SMP1	YBR182C	-0.00613687	0.00613687	0.244821	0.327517	0.401466
Deoxycytidine	226.08	PUT3	YKL015W	0.00613126	0.00613126	-0.455609	0.0574192	0.0965067
Fumarate	115	YAP1	YML007W	-0.00608106	0.00608106	-0.605104	0.00779747	0.0191776
L-Citrulline	174.09	YOX1	YML027W	0.0060704	0.0060704	-0.526575	0.024763	0.0479454
Hypoxanthine	135.03	ABF1	YKL112W	0.00606586	0.00606586	0.573609	0.0128131	0.0280246
dUDP	387	RIM101	YHL027W	-0.00604769	0.00604769	-0.669145	0.00239033	0.00740343
Deoxycytidine	226.08	REB1	YBR049C	0.00603541	0.00603541	0.745521	0.000383346	0.00162074
L-Glutamine	145.06	MAC1	YMR021C	-0.0060311	0.0060311	-0.811977	4.27269e-05	0.000316272
Xanthine	151.03	CBF1	YJR060W	0.00601477	0.00601477	0.32738	0.184794	0.255499
Xanthosine 5-phosphate	363.03	ADR1	YDR216W	0.00601171	0.00601171	0.568251	0.0138773	0.0299359
Inosine	267.07	ARR1	YPR199C	-0.00594078	0.00594078	-0.0219022	0.931258	0.943603
L-Saccharopine	275.12	SUT1	YGL162W	-0.00591845	0.00591845	-0.749593	0.000341722	0.00149094
dUDP	387	ECM22	YLR228C	0.00590407	0.00590407	-0.488578	0.0396517	0.0708008
But-1-ene-1,2,4-tricarboxylate	187.02	GCR1	YPL075W	0.00590358	0.00590358	0.825727	2.43731e-05	0.000200885
2-(Formamido)-N1-(5-phospho-D-ribosyl)acetamidine	312.06	HSF1	YGL073W	0.00585134	0.00585134	0.880475	1.43028e-06	2.34538e-05
Xanthine	151.03	YAP3	YHL009C	0.00582732	0.00582732	0.182875	0.467635	0.535441
Pyruvate	87.01	UME6	YDR207C	0.00581976	0.00581976	0.738189	0.000469046	0.00189502
Pyruvate	87.01	RTG3	YBL103C	0.00581839	0.00581839	0.418459	0.0839416	0.132572
L-Proline	114.06	PDR1	YGL013C	-0.00580873	0.00580873	-0.374844	0.125356	0.18657
Hypoxanthine	135.03	CRZ1	YNL027W	0.00578649	0.00578649	0.391832	0.107806	0.163766
L-Proline	114.06	RTG3	YBL103C	-0.00573758	0.00573758	0.0993984	0.694755	0.741718
Ornithine	131.08	BAS1	YKR099W	0.00565541	0.00565541	0.84091	1.23657e-05	0.000115837
2-(Formamido)-N1-(5-phospho-D-ribosyl)acetamidine	312.06	ZAP1	YJL056C	-0.00557265	0.00557265	-0.912481	1.31139e-07	5.15082e-06
Hypoxanthine	135.03	GZF3	YJL110C	0.00550197	0.00550197	0.252167	0.312743	0.388622
gamma-Amino-gamma-cyanobutanoate	127.05	HSF1	YGL073W	0.00548612	0.00548612	0.878397	1.63063e-06	2.45365e-05
NAD	662.1	DAL82	YNL314W	0.00545366	0.00545366	-0.631052	0.00497966	0.0135945
dUDP	387	PHD1	YKL043W	0.00538029	0.00538029	0.642241	0.00405408	0.0115288
gamma-Amino-gamma-cyanobutanoate	127.05	RPH1	YER169W	-0.00537912	0.00537912	-0.879849	1.48831e-06	2.34538e-05
Fumarate	115	CAD1	YDR423C	-0.00536834	0.00536834	0.136876	0.588104	0.64442
L-Glutamine	145.06	NRG1	YDR043C	-0.00536122	0.00536122	-0.857648	5.37124e-06	6.0026e-05
L-Glutamine	145.06	GAL4	YPL248C	0.00531795	0.00531795	0.215646	0.390117	0.463052
NAD	662.1	STB4	YMR019W	-0.00530889	0.00530889	-0.908792	1.80309e-07	5.84019e-06
O-Phospho-L-serine	184	GAL4	YPL248C	-0.00530682	0.00530682	-0.0288801	0.909433	0.9264
gamma-Amino-gamma-cyanobutanoate	127.05	HAP1	YLR256W	0.005286	0.005286	0.856256	5.77968e-06	6.2401e-05
L-Glutamine	145.06	FKH1	YIL131C	-0.00526236	0.00526236	-0.838017	1.41467e-05	0.000128785
O-Phospho-L-serine	184	BAS1	YKR099W	-0.00524984	0.00524984	-0.431635	0.0736775	0.119523
NAD	662.1	XBP1	YIL101C	-0.00523715	0.00523715	-0.872711	2.30695e-06	3.10464e-05
dUDP	387	RLM1	YPL089C	0.00523346	0.00523346	0.626553	0.0053972	0.0144454
dUDP	387	TEC1	YBR083W	-0.00522119	0.00522119	-0.876187	1.86979e-06	2.7276e-05
L-Citrulline	174.09	HAP3	YBL021C	-0.0052112	0.0052112	-0.738214	0.000468729	0.00189502
Xanthine	151.03	CAD1	YDR423C	0.00519092	0.00519092	0.349594	0.155009	0.22273
Xanthosine 5-phosphate	363.03	ABF1	YKL112W	0.0051859	0.0051859	0.0458483	0.856644	0.880133
Deoxycytidine	226.08	PDR3	YBL005W	-0.00518362	0.00518362	-0.691049	0.0014943	0.00494049
gamma-Amino-gamma-cyanobutanoate	127.05	RTG3	YBL103C	-0.00517201	0.00517201	-0.102924	0.684445	0.733581
Dethiobiotin	213.12	SKO1	YNL167C	0.00510611	0.00510611	-0.486309	0.040719	0.0721837
gamma-Amino-gamma-cyanobutanoate	127.05	NRG1	YDR043C	-0.00509686	0.00509686	-0.862154	4.21493e-06	4.85224e-05
L-Glutamine	145.06	PDR1	YGL013C	0.00486504	0.00486504	0.354682	0.148681	0.215087
L-Saccharopine	275.12	GAT1	YFL021W	-0.00482606	0.00482606	-0.602826	0.00809611	0.0197343
gamma-Amino-gamma-cyanobutanoate	127.05	THI2	YBR240C	-0.00481674	0.00481674	-0.615529	0.00654162	0.0168251
dUDP	387	ABF1	YKL112W	0.00481351	0.00481351	0.776613	0.000150435	0.000794951
L-Saccharopine	275.12	SKN7	YHR206W	0.00480502	0.00480502	-0.341579	0.165348	0.23458
2-(Formamido)-N1-(5-phospho-D-ribosyl)acetamidine	312.06	PHD1	YKL043W	0.00480473	0.00480473	0.643575	0.00395383	0.0112605
Deoxycytidine	226.08	HAP2	YGL237C	0.00479821	0.00479821	0.787279	0.000105481	0.000619554
L-Proline	114.06	HAP4	YKL109W	0.00475309	0.00475309	0.717645	0.000798888	0.00287509
NAD	662.1	SNT2	YGL131C	-0.00475089	0.00475089	-0.165145	0.512552	0.578893
Pyruvate	87.01	GAT1	YFL021W	0.00474579	0.00474579	0.548874	0.0183264	0.0373766
2-Oxoadipate	159.03	SNT2	YGL131C	0.00473624	0.00473624	0.0159237	0.949996	0.960173
Deoxycytidine	226.08	RTG3	YBL103C	-0.00472702	0.00472702	-0.278812	0.262554	0.341088
Xanthine	151.03	SNT2	YGL131C	0.00472085	0.00472085	-0.39277	0.106892	0.163036
Hypoxanthine	135.03	ASH1	YKL185W	-0.00471183	0.00471183	-0.336218	0.172518	0.24295
L-Glutamine	145.06	SKN7	YHR206W	-0.00470705	0.00470705	-0.614993	0.00660194	0.0169203
2-Oxoadipate	159.03	GAL4	YPL248C	-0.00467938	0.00467938	-0.0928103	0.714153	0.757771
Ornithine	131.08	UGA3	YDL170W	-0.00467744	0.00467744	-0.53237	0.0229425	0.0449537
dUDP	387	SKO1	YNL167C	-0.0046432	0.0046432	-0.806967	5.18485e-05	0.000364274
2-Oxoadipate	159.03	TYE7	YOR344C	0.00463393	0.00463393	0.00781888	0.975436	0.979022
Deoxycytidine	226.08	PHD1	YKL043W	0.00460678	0.00460678	0.420935	0.0819377	0.130269
Inosine	267.07	SIP4	YJL089W	-0.00459644	0.00459644	0.138094	0.584755	0.642033
Ornithine	131.08	MET31	YPL038W	-0.00458883	0.00458883	0.552669	0.0173769	0.03563
2-Oxoadipate	159.03	HAP4	YKL109W	-0.00455538	0.00455538	0.252051	0.312972	0.388622
2-(Formamido)-N1-(5-phospho-D-ribosyl)acetamidine	312.06	GCN4	YEL009C	-0.00450593	0.00450593	-0.778114	0.000143269	0.000764768
2-(Formamido)-N1-(5-phospho-D-ribosyl)acetamidine	312.06	GAL4	YPL248C	0.0044941	0.0044941	0.361761	0.140175	0.205583
O-Phospho-L-serine	184	GZF3	YJL110C	0.00449326	0.00449326	0.306494	0.216076	0.29079
L-Proline	114.06	CIN5	YOR028C	0.00444643	0.00444643	0.850284	7.84776e-06	8.15058e-05
Dethiobiotin	213.12	GAL4	YPL248C	-0.00442831	0.00442831	-0.0236804	0.925691	0.939456
L-Saccharopine	275.12	GCN4	YEL009C	-0.00436537	0.00436537	-0.726078	0.000645611	0.00240969
But-1-ene-1,2,4-tricarboxylate	187.02	RDS1	YCR106W	-0.00432301	0.00432301	-0.726779	0.000634066	0.00237588
L-Saccharopine	275.12	GZF3	YJL110C	-0.00431382	0.00431382	-0.57343	0.0128475	0.028059
Pyruvate	87.01	PHD1	YKL043W	-0.00431247	0.00431247	-0.529922	0.0236983	0.0462589
Pyruvate	87.01	SMP1	YBR182C	-0.00429855	0.00429855	-0.336221	0.172515	0.24295
Ornithine	131.08	RLM1	YPL089C	-0.00429815	0.00429815	0.330953	0.179763	0.250749
L-Proline	114.06	RIM101	YHL027W	0.00429134	0.00429134	0.536782	0.021628	0.0428746
Pyruvate	87.01	ABF1	YKL112W	0.0042839	0.0042839	-0.370698	0.129928	0.192624
L-Citrulline	174.09	MCM1	YMR043W	0.00426905	0.00426905	-0.267842	0.282569	0.359514
2-Oxoadipate	159.03	SWI5	YDR146C	-0.00425965	0.00425965	-0.133985	0.596085	0.652416
2-(Formamido)-N1-(5-phospho-D-ribosyl)acetamidine	312.06	FKH1	YIL131C	-0.00423656	0.00423656	-0.86223	4.19729e-06	4.85224e-05
Dethiobiotin	213.12	AZF1	YOR113W	-0.00419567	0.00419567	-0.524471	0.0254514	0.0489804
Xanthosine 5-phosphate	363.03	UME6	YDR207C	0.00419017	0.00419017	0.271783	0.275275	0.352801
But-1-ene-1,2,4-tricarboxylate	187.02	YAP1	YML007W	-0.00417013	0.00417013	0.560111	0.0156276	0.0327102
4-Aminobutanoate	102.06	ABF1	YKL112W	0.00416858	0.00416858	0.149697	0.553266	0.616496
Deoxycytidine	226.08	HSF1	YGL073W	0.00415939	0.00415939	0.761918	0.000238117	0.00113195
NAD	662.1	SKN7	YHR206W	0.00415864	0.00415864	-0.576808	0.0122093	0.0270673
NAD	662.1	HAP3	YBL021C	-0.00415206	0.00415206	-0.918063	7.88078e-08	4.74233e-06
Dethiobiotin	213.12	SPT2	YER161C	-0.00408824	0.00408824	-0.534882	0.0221867	0.0437149
2-(Formamido)-N1-(5-phospho-D-ribosyl)acetamidine	312.06	SNT2	YGL131C	-0.00407903	0.00407903	-0.327099	0.185192	0.255499
Deoxycytidine	226.08	ECM22	YLR228C	0.00403716	0.00403716	-0.165907	0.510581	0.577008
O-Phospho-L-serine	184	ECM22	YLR228C	-0.00402871	0.00402871	0.35788	0.144795	0.210831
Ornithine	131.08	MSN4	YKL062W	-0.00402417	0.00402417	-0.774657	0.000160224	0.000839015
Xanthosine 5-phosphate	363.03	THI2	YBR240C	0.00401201	0.00401201	0.580083	0.0116151	0.0259608
Inosine	267.07	YOX1	YML027W	0.0039884	0.0039884	-0.0661748	0.794181	0.830695
L-Citrulline	174.09	CRZ1	YNL027W	0.00393592	0.00393592	-0.160083	0.525735	0.591684
L-Saccharopine	275.12	PUT3	YKL015W	0.00389086	0.00389086	-0.0562935	0.824421	0.853913
But-1-ene-1,2,4-tricarboxylate	187.02	ECM22	YLR228C	-0.0038771	0.0038771	-0.41467	0.0870773	0.136959
Xanthine	151.03	GCR1	YPL075W	0.00383343	0.00383343	0.572605	0.0130074	0.0283435
Inosine	267.07	NRG1	YDR043C	0.00377296	0.00377296	-0.0226359	0.928961	0.941774
2-Oxoadipate	159.03	PHO2	YDL106C	-0.00376413	0.00376413	0.0150116	0.952857	0.961409
dUDP	387	STP1	YDR463W	-0.00374726	0.00374726	-0.894802	5.39638e-07	1.29464e-05
Xanthine	151.03	YAP7	YOL028C	0.00374358	0.00374358	0.27489	0.269605	0.348353
2-(Formamido)-N1-(5-phospho-D-ribosyl)acetamidine	312.06	SKN7	YHR206W	0.00373984	0.00373984	-0.564375	0.0146904	0.0312109
NAD	662.1	UGA3	YDL170W	-0.003738	0.003738	-0.758416	0.000264415	0.00122348
But-1-ene-1,2,4-tricarboxylate	187.02	NRG1	YDR043C	-0.00373255	0.00373255	-0.760911	0.000245443	0.00115528
Dethiobiotin	213.12	MET32	YDR253C	0.00372731	0.00372731	0.52489	0.025313	0.0488124
Xanthine	151.03	HAP3	YBL021C	-0.00372008	0.00372008	-0.358126	0.1445	0.210632
O-Phospho-L-serine	184	YAP5	YIR018W	-0.00371963	0.00371963	-0.564812	0.0145967	0.0311668
2-Oxoadipate	159.03	RDS1	YCR106W	-0.00371052	0.00371052	-0.0126494	0.960269	0.965829
L-Citrulline	174.09	PHD1	YKL043W	0.00370077	0.00370077	0.500481	0.0343984	0.0633288
dUDP	387	RTG3	YBL103C	-0.00368864	0.00368864	-0.141848	0.574485	0.633491
But-1-ene-1,2,4-tricarboxylate	187.02	HSF1	YGL073W	0.00368677	0.00368677	0.791156	9.22574e-05	0.000566267
L-Citrulline	174.09	SMP1	YBR182C	-0.00366952	0.00366952	0.310721	0.209484	0.282316
gamma-Amino-gamma-cyanobutanoate	127.05	PHD1	YKL043W	-0.00366901	0.00366901	0.593997	0.0093424	0.0220957
Ornithine	131.08	ASH1	YKL185W	-0.00359845	0.00359845	-0.809539	4.69787e-05	0.000336241
Pyruvate	87.01	SKN7	YHR206W	0.00358712	0.00358712	0.363001	0.13872	0.203606
gamma-Amino-gamma-cyanobutanoate	127.05	ABF1	YKL112W	0.0035796	0.0035796	0.774566	0.00016069	0.000839015
Deoxycytidine	226.08	PDR1	YGL013C	-0.0035705	0.0035705	0.491941	0.0381088	0.0687037
NAD	662.1	ARR1	YPR199C	0.00353044	0.00353044	-0.0625315	0.8053	0.840027
dUDP	387	TYE7	YOR344C	0.00352578	0.00352578	0.778385	0.000142005	0.000762281
Fumarate	115	SUT1	YGL162W	0.00349857	0.00349857	0.595349	0.00914215	0.0217567
Deoxycytidine	226.08	STB4	YMR019W	-0.00349563	0.00349563	-0.731911	0.000554676	0.00214183
Pyruvate	87.01	CBF1	YJR060W	0.00348509	0.00348509	-0.211956	0.398474	0.471507
NAD	662.1	ADR1	YDR216W	-0.00345595	0.00345595	-0.56042	0.0155583	0.0326008
Xanthine	151.03	HAP2	YGL237C	0.00344997	0.00344997	0.57498	0.0125515	0.0276018
Fumarate	115	SMP1	YBR182C	0.0034442	0.0034442	-0.320264	0.195091	0.265919
dUDP	387	MAC1	YMR021C	-0.00342859	0.00342859	-0.830031	2.02433e-05	0.0001732
Deoxycytidine	226.08	GAT1	YFL021W	-0.00338565	0.00338565	-0.224165	0.371197	0.442519
4-Aminobutanoate	102.06	ADR1	YDR216W	-0.0033798	0.0033798	-0.0907023	0.720396	0.762279
L-Citrulline	174.09	AZF1	YOR113W	-0.00332248	0.00332248	-0.73664	0.000489069	0.00195935
Dethiobiotin	213.12	CBF1	YJR060W	0.00328089	0.00328089	0.344076	0.162078	0.230626
4-Aminobutanoate	102.06	PHO4	YFR034C	0.00326907	0.00326907	0.327203	0.185046	0.255499
Dethiobiotin	213.12	ABF1	YKL112W	-0.00326332	0.00326332	0.148101	0.557554	0.617672
O-Phospho-L-serine	184	RAP1	YNL216W	-0.00326165	0.00326165	-0.585353	0.0107073	0.0243906
Ornithine	131.08	SUT1	YGL162W	-0.00320283	0.00320283	-0.758478	0.000263929	0.00122348
L-Glutamine	145.06	SFP1	YLR403W	0.00316403	0.00316403	0.879345	1.53645e-06	2.35776e-05
Deoxycytidine	226.08	RLM1	YPL089C	-0.00316031	0.00316031	0.297693	0.230227	0.305319
NAD	662.1	RPN4	YDL020C	-0.00315782	0.00315782	-0.85697	5.5669e-06	6.114e-05
gamma-Amino-gamma-cyanobutanoate	127.05	GAL4	YPL248C	0.00313749	0.00313749	0.229907	0.358742	0.430724
But-1-ene-1,2,4-tricarboxylate	187.02	FKH1	YIL131C	-0.00313245	0.00313245	-0.743099	0.000410058	0.00171096
Fumarate	115	RTG3	YBL103C	-0.00308445	0.00308445	-0.128709	0.61076	0.665808
Dethiobiotin	213.12	ARR1	YPR199C	0.003078	0.003078	-0.0265933	0.916579	0.931693
Hypoxanthine	135.03	HAP1	YLR256W	-0.00306585	0.00306585	0.328482	0.183232	0.254474
2-Oxoadipate	159.03	ARR1	YPR199C	0.00306357	0.00306357	0.0593866	0.814928	0.847543
L-Saccharopine	275.12	CRZ1	YNL027W	0.00305945	0.00305945	-0.31236	0.206964	0.279709
L-Citrulline	174.09	GAL4	YPL248C	0.0030449	0.0030449	0.386129	0.11349	0.171446
Xanthine	151.03	TYE7	YOR344C	0.00302397	0.00302397	0.303021	0.221591	0.296541
Fumarate	115	GCR1	YPL075W	-0.00301798	0.00301798	-0.737463	0.000478338	0.00192443
dUDP	387	SIP4	YJL089W	0.00296007	0.00296007	0.795343	7.95804e-05	0.000501908
Pyruvate	87.01	RDS1	YCR106W	-0.00295658	0.00295658	0.376073	0.124024	0.185019
Deoxycytidine	226.08	ROX1	YPR065W	-0.00294718	0.00294718	-0.698862	0.00125166	0.00419636
Xanthosine 5-phosphate	363.03	FKH1	YIL131C	-0.00290947	0.00290947	0.227718	0.363461	0.435197
Inosine	267.07	RPN4	YDL020C	-0.00290253	0.00290253	-0.350366	0.154037	0.221995
Fumarate	115	RDS1	YCR106W	0.00289399	0.00289399	0.598383	0.00870532	0.0210314
4-Aminobutanoate	102.06	RTG3	YBL103C	-0.00288028	0.00288028	0.181328	0.471475	0.538546
L-Proline	114.06	CBF1	YJR060W	0.00287551	0.00287551	-0.631702	0.00492149	0.0134935
L-Glutamine	145.06	SPT23	YKL020C	-0.00287381	0.00287381	-0.874888	2.02398e-06	2.80277e-05
2-(Formamido)-N1-(5-phospho-D-ribosyl)acetamidine	312.06	INO2	YDR123C	-0.00287128	0.00287128	-0.880144	1.46071e-06	2.34538e-05
Xanthine	151.03	HAP1	YLR256W	0.00286773	0.00286773	0.367834	0.133153	0.196794
L-Glutamine	145.06	HAP2	YGL237C	0.00286544	0.00286544	0.800045	6.71397e-05	0.000439397
L-Citrulline	174.09	ECM22	YLR228C	-0.00285849	0.00285849	-0.503553	0.033134	0.0613701
Hypoxanthine	135.03	THI2	YBR240C	0.0028582	0.0028582	0.178601	0.478277	0.544365
L-Glutamine	145.06	ECM22	YLR228C	-0.00281495	0.00281495	-0.452688	0.0592415	0.0992204
L-Proline	114.06	THI2	YBR240C	0.00277634	0.00277634	0.491056	0.0385103	0.0692968
Pyruvate	87.01	GCR1	YPL075W	-0.00273768	0.00273768	-0.672155	0.00224591	0.00704752
Pyruvate	87.01	CRZ1	YNL027W	-0.00272937	0.00272937	-0.010899	0.965764	0.970334
Ornithine	131.08	TYE7	YOR344C	-0.00270909	0.00270909	0.592465	0.00957345	0.0225029
Ornithine	131.08	GAL4	YPL248C	0.00266455	0.00266455	0.431185	0.0740124	0.119862
Dethiobiotin	213.12	YAP3	YHL009C	0.00265234	0.00265234	0.421957	0.0811209	0.129293
O-Phospho-L-serine	184	GCR1	YPL075W	-0.00263794	0.00263794	-0.518698	0.0274161	0.0521315
Inosine	267.07	XBP1	YIL101C	-0.00263205	0.00263205	-0.121722	0.630415	0.68295
gamma-Amino-gamma-cyanobutanoate	127.05	MAC1	YMR021C	-0.00262132	0.00262132	-0.809916	4.62978e-05	0.000335133
L-Citrulline	174.09	YAP3	YHL009C	0.00260781	0.00260781	0.631226	0.00496401	0.0135841
4-Aminobutanoate	102.06	ECM22	YLR228C	-0.00260528	0.00260528	0.15428	0.541041	0.606054
L-Saccharopine	275.12	SMP1	YBR182C	0.00259724	0.00259724	0.372755	0.127646	0.189535
O-Phospho-L-serine	184	PDR1	YGL013C	-0.00259622	0.00259622	-0.363241	0.13844	0.203351
Inosine	267.07	YAP3	YHL009C	0.00257821	0.00257821	0.182263	0.469152	0.536535
NAD	662.1	MCM1	YMR043W	0.00256607	0.00256607	-0.428793	0.0758087	0.122357
gamma-Amino-gamma-cyanobutanoate	127.05	UGA3	YDL170W	-0.00251094	0.00251094	-0.752968	0.000310167	0.00137206
O-Phospho-L-serine	184	HAP2	YGL237C	-0.00243265	0.00243265	-0.61568	0.00652467	0.0168041
L-Saccharopine	275.12	MCM1	YMR043W	-0.00243171	0.00243171	-0.357829	0.144857	0.210831
4-Aminobutanoate	102.06	RIM101	YHL027W	0.00243024	0.00243024	0.235863	0.346074	0.419105
4-Aminobutanoate	102.06	REB1	YBR049C	0.00242408	0.00242408	0.0657575	0.795452	0.83157
Ornithine	131.08	SKO1	YNL167C	-0.00241991	0.00241991	-0.70779	0.00101537	0.00352153
L-Proline	114.06	RLM1	YPL089C	-0.00241455	0.00241455	-0.526733	0.024712	0.0478952
2-Oxoadipate	159.03	RIM101	YHL027W	-0.00240859	0.00240859	-0.0383678	0.879858	0.900594
O-Phospho-L-serine	184	SKN7	YHR206W	0.00238594	0.00238594	0.277914	0.264158	0.342241
O-Phospho-L-serine	184	TYE7	YOR344C	-0.00237278	0.00237278	-0.577819	0.0120234	0.0267483
gamma-Amino-gamma-cyanobutanoate	127.05	CHA4	YLR098C	-0.00236672	0.00236672	-0.81724	3.46547e-05	0.000262472
But-1-ene-1,2,4-tricarboxylate	187.02	PHD1	YKL043W	-0.00235197	0.00235197	0.401152	0.0989612	0.152512
L-Glutamine	145.06	INO2	YDR123C	-0.00234217	0.00234217	-0.869404	2.80178e-06	3.47503e-05
O-Phospho-L-serine	184	YOX1	YML027W	0.00232387	0.00232387	0.496883	0.0359261	0.0656356
2-(Formamido)-N1-(5-phospho-D-ribosyl)acetamidine	312.06	MCM1	YMR043W	-0.00229977	0.00229977	-0.36531	0.13604	0.200752
2-Oxoadipate	159.03	ROX1	YPR065W	0.00226441	0.00226441	0.476897	0.0453825	0.0789135
2-(Formamido)-N1-(5-phospho-D-ribosyl)acetamidine	312.06	PHO2	YDL106C	-0.00223827	0.00223827	-0.771019	0.000179868	0.000913625
Pyruvate	87.01	RLM1	YPL089C	0.00220662	0.00220662	-0.287274	0.247733	0.324037
O-Phospho-L-serine	184	SIP4	YJL089W	-0.00218808	0.00218808	-0.567927	0.013944	0.0300294
Xanthosine 5-phosphate	363.03	NRG1	YDR043C	0.00216717	0.00216717	0.465246	0.0517056	0.0879088
4-Aminobutanoate	102.06	THI2	YBR240C	0.00215883	0.00215883	0.377424	0.12257	0.182994
Inosine	267.07	REB1	YBR049C	0.00215665	0.00215665	0.326519	0.18602	0.255744
Ornithine	131.08	CRZ1	YNL027W	0.00215012	0.00215012	-0.14918	0.554654	0.616605
Pyruvate	87.01	ADR1	YDR216W	-0.00214808	0.00214808	0.301948	0.223313	0.298428
2-(Formamido)-N1-(5-phospho-D-ribosyl)acetamidine	312.06	GLN3	YER040W	-0.00214189	0.00214189	-0.892182	6.51463e-07	1.49993e-05
Ornithine	131.08	SMP1	YBR182C	0.00212909	0.00212909	0.420755	0.082082	0.130342
Fumarate	115	SIP4	YJL089W	-0.0021173	0.0021173	-0.433617	0.0722178	0.117354
2-Oxoadipate	159.03	ADR1	YDR216W	0.00210263	0.00210263	0.0922503	0.71581	0.758687
Hypoxanthine	135.03	RTG3	YBL103C	0.00208687	0.00208687	-0.30149	0.224051	0.299205
Deoxycytidine	226.08	HAP4	YKL109W	-0.00207928	0.00207928	-0.475023	0.0463576	0.0800989
Deoxycytidine	226.08	CHA4	YLR098C	0.00207882	0.00207882	-0.440517	0.0673017	0.110493
L-Glutamine	145.06	SKO1	YNL167C	-0.00207256	0.00207256	-0.781487	0.000128212	0.000712248
dUDP	387	HSF1	YGL073W	0.00206139	0.00206139	0.896529	4.75383e-07	1.22765e-05
2-Oxoadipate	159.03	PHD1	YKL043W	-0.00205066	0.00205066	-0.339867	0.167616	0.237279
Pyruvate	87.01	PDR1	YGL013C	0.00203931	0.00203931	-0.281075	0.258537	0.337015
Inosine	267.07	AZF1	YOR113W	-0.00201821	0.00201821	-0.160671	0.524197	0.590649
Ornithine	131.08	YAP7	YOL028C	0.00201753	0.00201753	-0.341299	0.165717	0.23493
Xanthine	151.03	ADR1	YDR216W	-0.00199688	0.00199688	-0.0539326	0.831683	0.860502
gamma-Amino-gamma-cyanobutanoate	127.05	RLM1	YPL089C	-0.00199017	0.00199017	0.624311	0.00561559	0.0149047
Inosine	267.07	CHA4	YLR098C	0.00198236	0.00198236	0.116188	0.64615	0.697623
2-Oxoadipate	159.03	BAS1	YKR099W	-0.00196824	0.00196824	-0.37234	0.128104	0.190067
Pyruvate	87.01	SNT2	YGL131C	0.00192992	0.00192992	0.247174	0.322741	0.398165
Xanthine	151.03	ABF1	YKL112W	0.00192182	0.00192182	0.479352	0.044129	0.0772257
2-(Formamido)-N1-(5-phospho-D-ribosyl)acetamidine	312.06	THI2	YBR240C	0.00191654	0.00191654	-0.539144	0.0209491	0.0416641
O-Phospho-L-serine	184	MOT3	YMR070W	0.00190975	0.00190975	0.419468	0.083121	0.131698
Deoxycytidine	226.08	SKN7	YHR206W	-0.00187457	0.00187457	-0.326253	0.1864	0.255898
But-1-ene-1,2,4-tricarboxylate	187.02	ROX1	YPR065W	-0.00185756	0.00185756	-0.741307	0.000430816	0.00177816
But-1-ene-1,2,4-tricarboxylate	187.02	REB1	YBR049C	0.00185552	0.00185552	0.800316	6.64757e-05	0.000436547
Fumarate	115	XBP1	YIL101C	0.00184854	0.00184854	0.577683	0.0120483	0.0267724
Dethiobiotin	213.12	UGA3	YDL170W	-0.00184271	0.00184271	-0.46104	0.0541438	0.0916464
Deoxycytidine	226.08	HAP3	YBL021C	-0.00183937	0.00183937	-0.637549	0.00442341	0.012383
4-Aminobutanoate	102.06	YAP1	YML007W	0.00183913	0.00183913	0.193867	0.440816	0.512097
2-(Formamido)-N1-(5-phospho-D-ribosyl)acetamidine	312.06	RAP1	YNL216W	0.00182055	0.00182055	0.894898	5.35892e-07	1.29464e-05
O-Phospho-L-serine	184	RTG3	YBL103C	-0.00181892	0.00181892	0.332862	0.177113	0.247958
Deoxycytidine	226.08	YAP3	YHL009C	0.00180952	0.00180952	0.493705	0.0373182	0.0674694
Ornithine	131.08	PHD1	YKL043W	0.0017943	0.0017943	0.524153	0.0255564	0.0491331
2-Oxoadipate	159.03	PUT3	YKL015W	0.00179088	0.00179088	0.0982866	0.698016	0.744784
Hypoxanthine	135.03	HAP4	YKL109W	-0.00178215	0.00178215	-0.250866	0.315329	0.390677
Ornithine	131.08	TEC1	YBR083W	-0.00177822	0.00177822	-0.738382	0.000466595	0.00189313
gamma-Amino-gamma-cyanobutanoate	127.05	HAP2	YGL237C	0.00177246	0.00177246	0.823399	2.68924e-05	0.00021586
Xanthine	151.03	SKO1	YNL167C	-0.00173653	0.00173653	-0.229266	0.360121	0.431739
Deoxycytidine	226.08	DAL82	YNL314W	-0.00172001	0.00172001	-0.232081	0.354088	0.426378
Xanthosine 5-phosphate	363.03	RTG3	YBL103C	-0.00171434	0.00171434	-0.151823	0.547581	0.612304
L-Citrulline	174.09	SUT1	YGL162W	-0.00170777	0.00170777	-0.762814	0.000231758	0.00111
Ornithine	131.08	GCN4	YEL009C	-0.00169282	0.00169282	-0.656578	0.00307849	0.00913509
But-1-ene-1,2,4-tricarboxylate	187.02	GAL4	YPL248C	0.00168215	0.00168215	0.276614	0.26649	0.344796
2-Oxoadipate	159.03	SIP4	YJL089W	-0.00165624	0.00165624	-0.32481	0.188469	0.258182
Deoxycytidine	226.08	GCN4	YEL009C	-0.0016546	0.0016546	-0.492765	0.037738	0.0680995
Ornithine	131.08	INO2	YDR123C	-0.00165055	0.00165055	-0.75545	0.000288557	0.00129749
Xanthosine 5-phosphate	363.03	RLM1	YPL089C	0.0016414	0.0016414	-0.339336	0.168323	0.238094
gamma-Amino-gamma-cyanobutanoate	127.05	SKO1	YNL167C	-0.00164085	0.00164085	-0.794019	8.34185e-05	0.000524384
Pyruvate	87.01	SIP4	YJL089W	-0.00163703	0.00163703	-0.569796	0.0135635	0.0293543
2-Oxoadipate	159.03	YAP7	YOL028C	-0.00160647	0.00160647	0.094403	0.709447	0.753615
But-1-ene-1,2,4-tricarboxylate	187.02	CBF1	YJR060W	0.00157843	0.00157843	0.675878	0.00207731	0.0065724
O-Phospho-L-serine	184	HAP4	YKL109W	-0.00155615	0.00155615	0.405719	0.0948231	0.146845
Xanthosine 5-phosphate	363.03	SKO1	YNL167C	-0.00154335	0.00154335	0.194393	0.439554	0.510941
Hypoxanthine	135.03	OPI1	YHL020C	-0.00153666	0.00153666	-0.359599	0.142737	0.20854
But-1-ene-1,2,4-tricarboxylate	187.02	LEU3	YLR451W	0.00153321	0.00153321	0.476518	0.0455783	0.0791287
Pyruvate	87.01	NRG1	YDR043C	0.00153056	0.00153056	0.635817	0.00456649	0.012684
Pyruvate	87.01	UGA3	YDL170W	-0.00152271	0.00152271	0.345696	0.15998	0.22815
Inosine	267.07	SWI5	YDR146C	0.00152106	0.00152106	0.168308	0.504394	0.571029
L-Saccharopine	275.12	MOT3	YMR070W	-0.00151801	0.00151801	-0.436867	0.0698701	0.114024
2-Oxoadipate	159.03	ACE2	YLR131C	-0.001493	0.001493	0.169871	0.500385	0.567163
Xanthine	151.03	SKN7	YHR206W	-0.00148246	0.00148246	-0.0976524	0.699879	0.745939
Xanthine	151.03	MBP1	YDL056W	-0.00143181	0.00143181	-0.291271	0.240922	0.316427
NAD	662.1	TEC1	YBR083W	-0.00140947	0.00140947	-0.898418	4.12746e-07	1.14313e-05
L-Proline	114.06	AZF1	YOR113W	0.00140072	0.00140072	0.778585	0.000141082	0.000761603
Deoxycytidine	226.08	ABF1	YKL112W	-0.00138123	0.00138123	0.602301	0.00816624	0.0198546
Pyruvate	87.01	RPN4	YDL020C	0.00138091	0.00138091	0.64038	0.00419748	0.0118835
Fumarate	115	ABF1	YKL112W	0.00137723	0.00137723	-0.663071	0.00270511	0.0082055
2-Oxoadipate	159.03	MET32	YDR253C	0.00137015	0.00137015	-0.156441	0.535316	0.600346
L-Proline	114.06	MBP1	YDL056W	0.00136179	0.00136179	0.824306	2.58859e-05	0.000210502
gamma-Amino-gamma-cyanobutanoate	127.05	YHP1	YDR451C	-0.00136132	0.00136132	-0.797725	7.3053e-05	0.000466904
NAD	662.1	PHO2	YDL106C	-0.00135541	0.00135541	-0.797276	7.42476e-05	0.000472957
O-Phospho-L-serine	184	GAT1	YFL021W	-0.00134303	0.00134303	0.232959	0.352219	0.424931
But-1-ene-1,2,4-tricarboxylate	187.02	GAT1	YFL021W	-0.00133457	0.00133457	-0.44578	0.0637219	0.105889
Xanthosine 5-phosphate	363.03	BAS1	YKR099W	0.00131069	0.00131069	0.133365	0.5978	0.653545
Fumarate	115	DAL82	YNL314W	-0.00130784	0.00130784	0.21414	0.393517	0.466798
Hypoxanthine	135.03	ADR1	YDR216W	-0.00129072	0.00129072	0.00739163	0.976778	0.979854
Xanthosine 5-phosphate	363.03	PHD1	YKL043W	-0.00128655	0.00128655	-0.382278	0.117446	0.176863
dUDP	387	GCN4	YEL009C	-0.00126437	0.00126437	-0.810126	4.5924e-05	0.00033462
2-Oxoadipate	159.03	YAP5	YIR018W	-0.00126413	0.00126413	-0.0758841	0.764736	0.802532
Hypoxanthine	135.03	UGA3	YDL170W	-0.00126027	0.00126027	0.0385967	0.879146	0.900594
Xanthosine 5-phosphate	363.03	GAT1	YFL021W	0.00125234	0.00125234	0.303121	0.221431	0.296535
L-Saccharopine	275.12	DAL80	YKR034W	0.0012515	0.0012515	-0.259003	0.299356	0.377604
Dethiobiotin	213.12	STB4	YMR019W	-0.00124293	0.00124293	-0.650903	0.00343857	0.0099865
NAD	662.1	CIN5	YOR028C	-0.00122312	0.00122312	-0.925184	3.89595e-08	3.3932e-06
2-Oxoadipate	159.03	ECM22	YLR228C	-0.00117296	0.00117296	0.268448	0.281439	0.358554
L-Glutamine	145.06	CHA4	YLR098C	-0.00114539	0.00114539	-0.817252	3.46383e-05	0.000262472
L-Citrulline	174.09	UGA3	YDL170W	-0.0011395	0.0011395	-0.518225	0.0275821	0.0523951
Fumarate	115	SKO1	YNL167C	0.00112678	0.00112678	0.560441	0.0155535	0.0326008
2-Oxoadipate	159.03	PHO4	YFR034C	-0.00112408	0.00112408	-0.027042	0.915177	0.931155
4-Aminobutanoate	102.06	CBF1	YJR060W	-0.00112213	0.00112213	-0.207808	0.407982	0.479492
Xanthosine 5-phosphate	363.03	HAP1	YLR256W	0.00110628	0.00110628	-0.232543	0.353104	0.42573
4-Aminobutanoate	102.06	YOX1	YML027W	0.00110531	0.00110531	0.308887	0.212327	0.285946
Xanthosine 5-phosphate	363.03	MCM1	YMR043W	-0.00108861	0.00108861	0.466284	0.0511165	0.087074
L-Glutamine	145.06	THI2	YBR240C	-0.00106638	0.00106638	-0.616563	0.00642657	0.0166303
Ornithine	131.08	DAL80	YKR034W	0.00106455	0.00106455	-0.146693	0.561346	0.621154
NAD	662.1	AZF1	YOR113W	-0.00105011	0.00105011	-0.879796	1.4933e-06	2.34538e-05
2-(Formamido)-N1-(5-phospho-D-ribosyl)acetamidine	312.06	RDS1	YCR106W	-0.00103815	0.00103815	-0.780542	0.000132289	0.000730648
Pyruvate	87.01	HAP2	YGL237C	-0.00103485	0.00103485	-0.768099	0.000197076	0.000988482
Deoxycytidine	226.08	ADR1	YDR216W	0.00103155	0.00103155	-0.410339	0.0907657	0.141826
gamma-Amino-gamma-cyanobutanoate	127.05	STB5	YHR178W	-0.00100337	0.00100337	-0.887191	9.20543e-07	1.87887e-05
O-Phospho-L-serine	184	CBF1	YJR060W	-0.0009599	0.0009599	-0.464648	0.0520468	0.0884101
2-Oxoadipate	159.03	NRG1	YDR043C	0.000958642	0.000958642	0.364727	0.136715	0.201435
4-Aminobutanoate	102.06	CRZ1	YNL027W	0.000942669	0.000942669	0.385661	0.113965	0.172028
Xanthine	151.03	SFP1	YLR403W	0.000940474	0.000940474	0.479855	0.0438752	0.0769225
gamma-Amino-gamma-cyanobutanoate	127.05	SMP1	YBR182C	-0.000935682	0.000935682	0.26615	0.285738	0.36282
Xanthine	151.03	BAS1	YKR099W	0.000935558	0.000935558	0.587444	0.0103634	0.0239238
Xanthosine 5-phosphate	363.03	CAD1	YDR423C	0.000927819	0.000927819	0.683984	0.00174615	0.00567498
Fumarate	115	MAC1	YMR021C	0.000917108	0.000917108	0.539799	0.0207638	0.0414626
L-Proline	114.06	SKO1	YNL167C	0.000905905	0.000905905	0.722252	0.000711787	0.00261582
Fumarate	115	RLM1	YPL089C	0.000905862	0.000905862	-0.406672	0.0939757	0.145888
Xanthine	151.03	PUT3	YKL015W	0.000882602	0.000882602	-0.409527	0.0914694	0.142576
NAD	662.1	MET32	YDR253C	0.000875137	0.000875137	0.866026	3.39881e-06	4.07818e-05
L-Saccharopine	275.12	ABF1	YKL112W	-0.000870727	0.000870727	0.409333	0.0916376	0.142722
2-(Formamido)-N1-(5-phospho-D-ribosyl)acetamidine	312.06	DAL80	YKR034W	0.00083147	0.00083147	-0.348558	0.15632	0.224102
NAD	662.1	ABF1	YKL112W	0.00082187	0.00082187	0.662097	0.00275863	0.00833481
4-Aminobutanoate	102.06	HAP4	YKL109W	-0.00080183	0.00080183	0.0373054	0.883163	0.902526
L-Citrulline	174.09	FKH1	YIL131C	-0.000784161	0.000784161	-0.725599	0.000653604	0.00243003
But-1-ene-1,2,4-tricarboxylate	187.02	SKO1	YNL167C	-0.000776122	0.000776122	-0.701323	0.00118238	0.00400102
Ornithine	131.08	ABF1	YKL112W	0.000772657	0.000772657	0.68264	0.00179781	0.0058034
NAD	662.1	BAS1	YKR099W	0.000772649	0.000772649	0.801637	6.33207e-05	0.000421623
Fumarate	115	MSN4	YKL062W	0.000769207	0.000769207	0.725961	0.000647565	0.00241227
L-Saccharopine	275.12	PDR3	YBL005W	0.000767229	0.000767229	-0.614075	0.0067062	0.0169788
dUDP	387	SPT23	YKL020C	-0.000766314	0.000766314	-0.891761	6.71137e-07	1.52684e-05
Inosine	267.07	HAP1	YLR256W	-0.000754255	0.000754255	0.144736	0.566639	0.626648
NAD	662.1	RPH1	YER169W	-0.000748019	0.000748019	-0.914533	1.0919e-07	4.74233e-06
Hypoxanthine	135.03	RDS1	YCR106W	-0.000742806	0.000742806	-0.144526	0.567208	0.626914
Xanthosine 5-phosphate	363.03	RDS1	YCR106W	-0.000740298	0.000740298	0.413031	0.0884598	0.13879
L-Citrulline	174.09	CIN5	YOR028C	-0.000739012	0.000739012	-0.798642	7.0664e-05	0.000458821
2-(Formamido)-N1-(5-phospho-D-ribosyl)acetamidine	312.06	ECM22	YLR228C	-0.000738621	0.000738621	-0.539547	0.0208349	0.0415611
4-Aminobutanoate	102.06	SKN7	YHR206W	0.000730499	0.000730499	0.0709542	0.779651	0.816838
L-Glutamine	145.06	ABF1	YKL112W	-0.000725559	0.000725559	0.774577	0.000160634	0.000839015
gamma-Amino-gamma-cyanobutanoate	127.05	ECM22	YLR228C	0.000708798	0.000708798	-0.466995	0.050716	0.0865342
L-Proline	114.06	ABF1	YKL112W	0.000699454	0.000699454	-0.729038	0.000598023	0.00226301
Xanthosine 5-phosphate	363.03	CRZ1	YNL027W	0.000683938	0.000683938	0.654741	0.00319149	0.00942648
L-Proline	114.06	TYE7	YOR344C	-0.000673159	0.000673159	-0.678628	0.00195959	0.0062309
Hypoxanthine	135.03	NRG1	YDR043C	0.00066339	0.00066339	-0.191535	0.446437	0.516742
2-Oxoadipate	159.03	SKN7	YHR206W	0.000657322	0.000657322	0.102566	0.68549	0.733877
2-Oxoadipate	159.03	LEU3	YLR451W	-0.000654661	0.000654661	-0.118459	0.639676	0.691415
NAD	662.1	HSF1	YGL073W	0.000649858	0.000649858	0.856769	5.62615e-06	6.12833e-05
But-1-ene-1,2,4-tricarboxylate	187.02	MAC1	YMR021C	0.000649594	0.000649594	-0.651557	0.00339537	0.00989107
Pyruvate	87.01	YOX1	YML027W	0.000645713	0.000645713	0.419033	0.0834736	0.132051
Hypoxanthine	135.03	YAP3	YHL009C	0.000621394	0.000621394	0.139084	0.582041	0.640714
4-Aminobutanoate	102.06	YAP5	YIR018W	0.00062039	0.00062039	-0.159348	0.527662	0.593154
Pyruvate	87.01	ARR1	YPR199C	-0.000614608	0.000614608	-0.21927	0.382006	0.454271
dUDP	387	MET32	YDR253C	0.000611245	0.000611245	0.813431	4.03513e-05	0.000301216
Xanthine	151.03	THI2	YBR240C	0.000604127	0.000604127	0.0323958	0.898458	0.916197
L-Saccharopine	275.12	SNT2	YGL131C	-0.000603084	0.000603084	-0.00125242	0.996065	0.996586
O-Phospho-L-serine	184	THI2	YBR240C	0.000586537	0.000586537	0.494126	0.0371315	0.0671953
Fumarate	115	HAP2	YGL237C	-0.000572086	0.000572086	-0.626814	0.00537224	0.0143988
But-1-ene-1,2,4-tricarboxylate	187.02	HAP4	YKL109W	0.000571782	0.000571782	-0.701994	0.00116407	0.00395121
4-Aminobutanoate	102.06	PDR1	YGL013C	-0.000566979	0.000566979	-0.151222	0.549184	0.61302
dUDP	387	STB5	YHR178W	-0.000566607	0.000566607	-0.91572	9.80068e-08	4.74233e-06
L-Saccharopine	275.12	SWI5	YDR146C	0.00056266	0.00056266	-0.496195	0.0362239	0.0658022
Xanthine	151.03	RLM1	YPL089C	0.000539178	0.000539178	0.0136937	0.956992	0.963039
2-Oxoadipate	159.03	YAP3	YHL009C	-0.00053314	0.00053314	-0.415707	0.0862114	0.13582
2-(Formamido)-N1-(5-phospho-D-ribosyl)acetamidine	312.06	RLM1	YPL089C	0.000527724	0.000527724	0.539134	0.0209519	0.0416641
Deoxycytidine	226.08	GZF3	YJL110C	-0.000527413	0.000527413	-0.112957	0.655407	0.705624
4-Aminobutanoate	102.06	SNT2	YGL131C	-0.000525008	0.000525008	-0.297216	0.231012	0.305537
Ornithine	131.08	MCM1	YMR043W	-0.000519483	0.000519483	-0.242951	0.331342	0.405374
Ornithine	131.08	MBP1	YDL056W	-0.000518416	0.000518416	-0.727543	0.000621686	0.00233867
Hypoxanthine	135.03	SPT2	YER161C	-0.000501943	0.000501943	-0.102711	0.685068	0.733836
L-Saccharopine	275.12	ARR1	YPR199C	0.000496868	0.000496868	-0.138451	0.583777	0.642033
L-Citrulline	174.09	NRG1	YDR043C	-0.000492551	0.000492551	-0.739352	0.000454469	0.00185575
Inosine	267.07	BAS1	YKR099W	0.000468165	0.000468165	0.442606	0.0658629	0.108691
2-Oxoadipate	159.03	GCN4	YEL009C	0.000459046	0.000459046	0.284688	0.252205	0.329436
dUDP	387	RPH1	YER169W	-0.000444977	0.000444977	-0.910302	1.58528e-07	5.40978e-06
Deoxycytidine	226.08	RDS1	YCR106W	0.000439642	0.000439642	-0.496249	0.0362006	0.0658022
L-Citrulline	174.09	STB4	YMR019W	-0.000437423	0.000437423	-0.7332	0.000536109	0.0020951
L-Proline	114.06	UGA3	YDL170W	0.000424676	0.000424676	0.603827	0.00796377	0.0194862
4-Aminobutanoate	102.06	YAP3	YHL009C	0.000424654	0.000424654	-0.187672	0.455831	0.525705
L-Saccharopine	275.12	SIP4	YJL089W	0.000412077	0.000412077	0.744416	0.000395346	0.00165681
4-Aminobutanoate	102.06	TYE7	YOR344C	-0.000402922	0.000402922	-0.272088	0.274715	0.352336
2-Oxoadipate	159.03	UGA3	YDL170W	-0.000402227	0.000402227	0.0269185	0.915562	0.931155
2-Oxoadipate	159.03	YOX1	YML027W	0.000395238	0.000395238	0.189994	0.450173	0.520121
4-Aminobutanoate	102.06	RLM1	YPL089C	-0.000390095	0.000390095	-0.302376	0.222626	0.297717
Pyruvate	87.01	HAP3	YBL021C	0.000388764	0.000388764	0.534874	0.0221891	0.0437149
Hypoxanthine	135.03	XBP1	YIL101C	-0.000387734	0.000387734	-0.268998	0.280418	0.35749
2-(Formamido)-N1-(5-phospho-D-ribosyl)acetamidine	312.06	TYE7	YOR344C	0.000385963	0.000385963	0.740553	0.000439813	0.00179975
L-Saccharopine	275.12	OPI1	YHL020C	-0.000363779	0.000363779	-0.806529	5.27182e-05	0.00036768
Xanthosine 5-phosphate	363.03	YAP1	YML007W	0.000361228	0.000361228	0.242155	0.332979	0.406855
Deoxycytidine	226.08	RFX1	YLR176C	-0.00035506	0.00035506	-0.684707	0.00171885	0.00562453
Dethiobiotin	213.12	BAS1	YKR099W	-0.000348544	0.000348544	0.256597	0.304027	0.38299
Pyruvate	87.01	LEU3	YLR451W	-0.000346326	0.000346326	-0.289398	0.244099	0.319941
Inosine	267.07	ASH1	YKL185W	-0.000340371	0.000340371	-0.198181	0.430513	0.501361
4-Aminobutanoate	102.06	GCN4	YEL009C	-0.00032817	0.00032817	0.269843	0.278851	0.356206
But-1-ene-1,2,4-tricarboxylate	187.02	SPT23	YKL020C	-0.000327253	0.000327253	-0.788541	0.000101012	0.00060135
gamma-Amino-gamma-cyanobutanoate	127.05	INO4	YOL108C	-0.000311315	0.000311315	-0.879849	1.48831e-06	2.34538e-05
Dethiobiotin	213.12	OPI1	YHL020C	-0.00031028	0.00031028	-0.544577	0.0194507	0.0392506
L-Saccharopine	275.12	ASH1	YKL185W	-0.000286199	0.000286199	-0.792124	8.91848e-05	0.00055156
Xanthine	151.03	GZF3	YJL110C	0.000281275	0.000281275	0.24557	0.325992	0.400268
NAD	662.1	STE12	YHR084W	-0.0002637	0.0002637	-0.852574	6.99007e-06	7.33957e-05
NAD	662.1	GAL4	YPL248C	0.000252645	0.000252645	0.269135	0.280163	0.357404
NAD	662.1	SMP1	YBR182C	-0.000250968	0.000250968	0.249496	0.318067	0.39367
4-Aminobutanoate	102.06	PUT3	YKL015W	-0.000230305	0.000230305	-0.288321	0.245939	0.322131
L-Citrulline	174.09	SKO1	YNL167C	-0.000229761	0.000229761	-0.665062	0.0025984	0.00795759
L-Citrulline	174.09	TEC1	YBR083W	-0.000226668	0.000226668	-0.721799	0.000719978	0.00262686
NAD	662.1	GCN4	YEL009C	-0.0002149	0.0002149	-0.829252	2.09427e-05	0.000177873
dUDP	387	RGT1	YKL038W	-0.00020533	0.00020533	-0.920248	6.39291e-08	4.36316e-06
gamma-Amino-gamma-cyanobutanoate	127.05	SOK2	YMR016C	-0.00020454	0.00020454	-0.879849	1.48831e-06	2.34538e-05
gamma-Amino-gamma-cyanobutanoate	127.05	MSN2	YMR037C	-0.000202748	0.000202748	-0.879849	1.48831e-06	2.34538e-05
Xanthine	151.03	XBP1	YIL101C	-0.000202131	0.000202131	-0.212112	0.398119	0.471379
Xanthosine 5-phosphate	363.03	HAP4	YKL109W	0.000200878	0.000200878	0.363518	0.138118	0.203189
Hypoxanthine	135.03	SNT2	YGL131C	-0.000191417	0.000191417	-0.244504	0.328164	0.402
Pyruvate	87.01	PUT3	YKL015W	0.000189506	0.000189506	0.396794	0.103029	0.158045
Fumarate	115	ACE2	YLR131C	-0.000179894	0.000179894	0.455894	0.057244	0.0962969
L-Proline	114.06	YAP5	YIR018W	-0.000179746	0.000179746	-0.60048	0.00841337	0.0203776
4-Aminobutanoate	102.06	ARR1	YPR199C	0.000175031	0.000175031	0.262796	0.292082	0.369648
NAD	662.1	YOX1	YML027W	-0.000173771	0.000173771	-0.782556	0.000123731	0.000696614
Hypoxanthine	135.03	AZF1	YOR113W	-0.00017153	0.00017153	-0.270612	0.27743	0.354855
NAD	662.1	DAL80	YKR034W	0.000166229	0.000166229	-0.423985	0.0795175	0.127055
gamma-Amino-gamma-cyanobutanoate	127.05	INO2	YDR123C	-0.000158893	0.000158893	-0.879849	1.48831e-06	2.34538e-05
NAD	662.1	GLN3	YER040W	-0.000156513	0.000156513	-0.926018	3.57148e-08	3.3932e-06
Ornithine	131.08	RAP1	YNL216W	0.000150366	0.000150366	0.782972	0.000122022	0.000689896
Pyruvate	87.01	GZF3	YJL110C	0.000149598	0.000149598	0.321064	0.193915	0.264694
NAD	662.1	SKO1	YNL167C	-0.000141801	0.000141801	-0.781315	0.000128946	0.000714251
4-Aminobutanoate	102.06	HAP1	YLR256W	-0.000138575	0.000138575	-0.27987	0.260671	0.339103
But-1-ene-1,2,4-tricarboxylate	187.02	SMP1	YBR182C	-0.000134881	0.000134881	0.369837	0.130892	0.193903
Xanthosine 5-phosphate	363.03	ARR1	YPR199C	0.000128366	0.000128366	0.136545	0.589015	0.645047
L-Saccharopine	275.12	RLM1	YPL089C	-0.000127524	0.000127524	0.297277	0.230911	0.305537
Inosine	267.07	ABF1	YKL112W	-0.000126192	0.000126192	0.142973	0.571423	0.630843
dUDP	387	CBF1	YJR060W	0.000118117	0.000118117	0.719324	0.000766173	0.00277303
Fumarate	115	YAP7	YOL028C	-0.000111789	0.000111789	0.355627	0.147525	0.2139
Xanthosine 5-phosphate	363.03	GCN4	YEL009C	0.000103957	0.000103957	0.512393	0.029695	0.0557985
Dethiobiotin	213.12	GCR1	YPL075W	-0.000102833	0.000102833	0.355837	0.147269	0.213691
2-Oxoadipate	159.03	PDR1	YGL013C	-9.83101e-05	9.83101e-05	-0.0489415	0.847077	0.873881
Xanthosine 5-phosphate	363.03	HAP3	YBL021C	-9.67102e-05	9.67102e-05	0.103178	0.683706	0.7332
Fumarate	115	RIM101	YHL027W	8.9876e-05	8.9876e-05	0.32071	0.194434	0.265213
But-1-ene-1,2,4-tricarboxylate	187.02	TEC1	YBR083W	-8.59702e-05	8.59702e-05	-0.708904	0.000988674	0.00345417
O-Phospho-L-serine	184	SWI4	YER111C	8.49957e-05	8.49957e-05	0.514746	0.028828	0.0543296
NAD	662.1	CRZ1	YNL027W	8.42282e-05	8.42282e-05	-0.427997	0.0764135	0.123021
4-Aminobutanoate	102.06	MOT3	YMR070W	-8.07246e-05	8.07246e-05	0.172289	0.494212	0.560498
Xanthine	151.03	HSF1	YGL073W	7.95018e-05	7.95018e-05	0.482605	0.0425085	0.0750081
Pyruvate	87.01	TEC1	YBR083W	7.87226e-05	7.87226e-05	0.579503	0.0117186	0.0261006
Deoxycytidine	226.08	SIP4	YJL089W	7.50394e-05	7.50394e-05	0.453023	0.0590304	0.0989537
Deoxycytidine	226.08	SKO1	YNL167C	-7.18418e-05	7.18418e-05	-0.503429	0.0331845	0.0613701
L-Saccharopine	275.12	ECM22	YLR228C	7.03044e-05	7.03044e-05	-0.521595	0.026416	0.0505314
2-Oxoadipate	159.03	CRZ1	YNL027W	-6.74862e-05	6.74862e-05	-0.182334	0.468975	0.536535
2-(Formamido)-N1-(5-phospho-D-ribosyl)acetamidine	312.06	SFP1	YLR403W	6.65788e-05	6.65788e-05	0.904849	2.49754e-07	7.82427e-06
L-Citrulline	174.09	YAP5	YIR018W	5.34052e-05	5.34052e-05	0.607143	0.00753768	0.0186587
2-(Formamido)-N1-(5-phospho-D-ribosyl)acetamidine	312.06	CRZ1	YNL027W	5.00176e-05	5.00176e-05	-0.345907	0.159708	0.227933
L-Proline	114.06	SKN7	YHR206W	4.57526e-05	4.57526e-05	0.528859	0.0240323	0.0468153
2-Oxoadipate	159.03	RPN4	YDL020C	-4.28079e-05	4.28079e-05	0.254697	0.307748	0.386599
Dethiobiotin	213.12	DAL82	YNL314W	3.85637e-05	3.85637e-05	-0.304065	0.219924	0.294929
Fumarate	115	CRZ1	YNL027W	-3.50102e-05	3.50102e-05	0.133604	0.59714	0.653196
L-Proline	114.06	ASH1	YKL185W	3.39727e-05	3.39727e-05	0.821026	2.96859e-05	0.000230609
NAD	662.1	PHD1	YKL043W	-3.20818e-05	3.20818e-05	0.717189	0.000807979	0.0028992
2-Oxoadipate	159.03	SKO1	YNL167C	-2.86246e-05	2.86246e-05	0.120414	0.634121	0.686187
L-Citrulline	174.09	HSF1	YGL073W	2.62692e-05	2.62692e-05	0.737903	0.000472692	0.00190572
2-(Formamido)-N1-(5-phospho-D-ribosyl)acetamidine	312.06	RPH1	YER169W	-2.49128e-05	2.49128e-05	-0.880144	1.46071e-06	2.34538e-05
Xanthosine 5-phosphate	363.03	TYE7	YOR344C	-2.34375e-05	2.34375e-05	-0.258738	0.299869	0.378001
gamma-Amino-gamma-cyanobutanoate	127.05	HAP5	YOR358W	-2.22982e-05	2.22982e-05	-0.85866	5.09046e-06	5.75614e-05
Hypoxanthine	135.03	PHD1	YKL043W	2.07296e-05	2.07296e-05	0.00934534	0.970642	0.974723
But-1-ene-1,2,4-tricarboxylate	187.02	DAL80	YKR034W	-1.28543e-05	1.28543e-05	-0.381862	0.117878	0.177235
gamma-Amino-gamma-cyanobutanoate	127.05	SKN7	YHR206W	-6.30271e-06	6.30271e-06	-0.606296	0.00764467	0.0188746
dUDP	387	YAP7	YOL028C	-5.66291e-06	5.66291e-06	-0.667538	0.0024705	0.00761118
Xanthine	151.03	UME6	YDR207C	-4.96453e-06	4.96453e-06	-0.363288	0.138386	0.203351
Hypoxanthine	135.03	SKO1	YNL167C	-2.21461e-06	2.21461e-06	-0.358749	0.143752	0.209702
NAD	662.1	RGT1	YKL038W	0	0	-0.928855	2.636e-08	3.23514e-06
Pyruvate	87.01	SOK2	YMR016C	0	0	0.575079	0.0125328	0.0275924
2-(Formamido)-N1-(5-phospho-D-ribosyl)acetamidine	312.06	UGA3	YDL170W	0	0	-0.690541	0.00151135	0.00498824
2-(Formamido)-N1-(5-phospho-D-ribosyl)acetamidine	312.06	NRG1	YDR043C	0	0	-0.830429	1.98938e-05	0.000172023
Fumarate	115	YAP6	YDR259C	0	0	-0.551336	0.0177059	0.0362658
Pyruvate	87.01	ACE2	YLR131C	0	0	0.481382	0.0431124	0.0758636
2-(Formamido)-N1-(5-phospho-D-ribosyl)acetamidine	312.06	SWI5	YDR146C	0	0	-0.654511	0.00320585	0.0094543
Fumarate	115	HAP4	YKL109W	0	0	0.602658	0.00811848	0.0197636
Pyruvate	87.01	CHA4	YLR098C	0	0	0.405549	0.0949747	0.146961
Fumarate	115	ASH1	YKL185W	0	0	0.604213	0.0079132	0.0193873
2-(Formamido)-N1-(5-phospho-D-ribosyl)acetamidine	312.06	MET32	YDR253C	0	0	0.781534	0.000128012	0.000712248
2-(Formamido)-N1-(5-phospho-D-ribosyl)acetamidine	312.06	YAP6	YDR259C	0	0	0.790697	9.37455e-05	0.000566267
2-(Formamido)-N1-(5-phospho-D-ribosyl)acetamidine	312.06	SUM1	YDR310C	0	0	-0.748688	0.000350622	0.0015091
2-(Formamido)-N1-(5-phospho-D-ribosyl)acetamidine	312.06	CAD1	YDR423C	0	0	-0.375431	0.124719	0.185782
2-(Formamido)-N1-(5-phospho-D-ribosyl)acetamidine	312.06	YHP1	YDR451C	0	0	-0.725165	0.000660922	0.00245247
4-Aminobutanoate	102.06	SWI5	YDR146C	0	0	0.228468	0.361841	0.433529
2-(Formamido)-N1-(5-phospho-D-ribosyl)acetamidine	312.06	STP1	YDR463W	0	0	-0.856708	5.64409e-06	6.12833e-05
Fumarate	115	PHD1	YKL043W	0	0	-0.264032	0.289733	0.366918
Pyruvate	87.01	DAL80	YKR034W	0	0	0.0566442	0.823344	0.853913
2-(Formamido)-N1-(5-phospho-D-ribosyl)acetamidine	312.06	SWI4	YER111C	0	0	-0.779102	0.00013871	0.00075489
Pyruvate	87.01	RFX1	YLR176C	0	0	0.651465	0.00340142	0.00989363
NAD	662.1	STB5	YHR178W	0	0	-0.915241	1.02394e-07	4.74233e-06
2-(Formamido)-N1-(5-phospho-D-ribosyl)acetamidine	312.06	MBP1	YDL056W	0	0	-0.870764	2.5883e-06	3.38784e-05
Fumarate	115	RFX1	YLR176C	0	0	0.63752	0.00442574	0.012383
L-Saccharopine	275.12	AFT2	YPL202C	0	0	-0.66779	0.0024578	0.00758781
Fumarate	115	SWI5	YDR146C	0	0	0.420251	0.0824879	0.130817
4-Aminobutanoate	102.06	NRG1	YDR043C	0	0	0.192836	0.443296	0.514173
NAD	662.1	SPT23	YKL020C	0	0	-0.82764	2.24571e-05	0.000188786
L-Saccharopine	275.12	GAL4	YPL248C	0	0	0.236514	0.344706	0.418243
Fumarate	115	YOX1	YML027W	0	0	0.30461	0.219057	0.293973
4-Aminobutanoate	102.06	ZAP1	YJL056C	0	0	0.265612	0.286749	0.363621
Fumarate	115	SFP1	YLR403W	0	0	-0.63993	0.00423273	0.0119656
Fumarate	115	HAP1	YLR256W	0	0	-0.594786	0.00922506	0.0218917
2-(Formamido)-N1-(5-phospho-D-ribosyl)acetamidine	312.06	FKH2	YNL068C	0	0	0.887132	9.24196e-07	1.87887e-05
L-Saccharopine	275.12	GCR1	YPL075W	0	0	0.686194	0.00166386	0.00547271
4-Aminobutanoate	102.06	GZF3	YJL110C	0	0	0.298112	0.229542	0.304798
4-Aminobutanoate	102.06	SUM1	YDR310C	0	0	0.225205	0.368923	0.440633
Fumarate	115	CHA4	YLR098C	0	0	0.503277	0.0332461	0.0613701
Fumarate	115	DAL80	YKR034W	0	0	0.198176	0.430525	0.501361
Pyruvate	87.01	SFP1	YLR403W	0	0	-0.592558	0.00955931	0.0224973
Fumarate	115	MET32	YDR253C	0	0	-0.396688	0.10313	0.158045
2-(Formamido)-N1-(5-phospho-D-ribosyl)acetamidine	312.06	SPT2	YER161C	0	0	-0.765386	0.000214285	0.00105
4-Aminobutanoate	102.06	INO2	YDR123C	0	0	0.253265	0.31057	0.387401
2-(Formamido)-N1-(5-phospho-D-ribosyl)acetamidine	312.06	RPN4	YDL020C	0	0	-0.798579	7.08279e-05	0.000458821
Pyruvate	87.01	HAP1	YLR256W	0	0	-0.490337	0.0388387	0.0696909
2-(Formamido)-N1-(5-phospho-D-ribosyl)acetamidine	312.06	YOX1	YML027W	0	0	-0.672378	0.0022355	0.00703703
Pyruvate	87.01	ASH1	YKL185W	0	0	0.680089	0.00189933	0.00607976
Fumarate	115	SWI4	YER111C	0	0	0.49644	0.036118	0.0658022
2-(Formamido)-N1-(5-phospho-D-ribosyl)acetamidine	312.06	GZF3	YJL110C	0	0	-0.380559	0.119243	0.178724
NAD	662.1	YAP5	YIR018W	0	0	0.610293	0.00715005	0.0178378
Fumarate	115	HSF1	YGL073W	0	0	-0.631173	0.00496875	0.0135841
2-(Formamido)-N1-(5-phospho-D-ribosyl)acetamidine	312.06	SPT23	YKL020C	0	0	-0.832059	1.85151e-05	0.000161563
NAD	662.1	TYE7	YOR344C	0	0	0.756966	0.000275997	0.00126786
2-(Formamido)-N1-(5-phospho-D-ribosyl)acetamidine	312.06	RGT1	YKL038W	0	0	-0.900192	3.60562e-07	1.07661e-05
Fumarate	115	SUM1	YDR310C	0	0	0.479913	0.0438464	0.0769225
Fumarate	115	PHO4	YFR034C	0	0	0.339862	0.167623	0.237279
Fumarate	115	RPH1	YER169W	0	0	0.564258	0.0147154	0.0312109
Fumarate	115	SPT2	YER161C	0	0	0.415134	0.0866894	0.136461
Fumarate	115	GLN3	YER040W	0	0	0.571054	0.0133122	0.0289086
Fumarate	115	YHP1	YDR451C	0	0	0.455299	0.0576108	0.0967436
Pyruvate	87.01	RGT1	YKL038W	0	0	0.627463	0.00531052	0.0142534
Fumarate	115	GCN4	YEL009C	0	0	0.467717	0.0503122	0.0860692
2-(Formamido)-N1-(5-phospho-D-ribosyl)acetamidine	312.06	CHA4	YLR098C	0	0	-0.742572	0.000416075	0.00172477
Pyruvate	87.01	SPT23	YKL020C	0	0	0.554237	0.0169962	0.0351512
2-(Formamido)-N1-(5-phospho-D-ribosyl)acetamidine	312.06	ACE2	YLR131C	0	0	-0.791508	9.11299e-05	0.000561772
2-(Formamido)-N1-(5-phospho-D-ribosyl)acetamidine	312.06	RFX1	YLR176C	0	0	-0.917309	8.45966e-08	4.74233e-06
2-(Formamido)-N1-(5-phospho-D-ribosyl)acetamidine	312.06	SOK2	YMR016C	0	0	-0.880144	1.46071e-06	2.34538e-05
NAD	662.1	FKH1	YIL131C	0	0	-0.885146	1.05573e-06	2.0799e-05
2-(Formamido)-N1-(5-phospho-D-ribosyl)acetamidine	312.06	HAP1	YLR256W	0	0	0.839388	1.32769e-05	0.000121982
Fumarate	115	STP1	YDR463W	0	0	0.553838	0.0170924	0.0352739
2-(Formamido)-N1-(5-phospho-D-ribosyl)acetamidine	312.06	SIP4	YJL089W	0	0	0.772574	0.000171237	0.000879663
Fumarate	115	YAP3	YHL009C	0	0	-0.383002	0.116694	0.176008
NAD	662.1	ZAP1	YJL056C	0	0	-0.937834	9.21849e-09	1.6015e-06
2-(Formamido)-N1-(5-phospho-D-ribosyl)acetamidine	312.06	MAC1	YMR021C	0	0	-0.715602	0.00084028	0.00297917
2-(Formamido)-N1-(5-phospho-D-ribosyl)acetamidine	312.06	PHO4	YFR034C	0	0	-0.64156	0.00410609	0.0116594
Fumarate	115	SPT23	YKL020C	0	0	0.620892	0.00596256	0.0156088
Fumarate	115	GZF3	YJL110C	0	0	-0.020729	0.934933	0.946322
4-Aminobutanoate	102.06	UME6	YDR207C	0	0	0.178641	0.478179	0.544365
Fumarate	115	ZAP1	YJL056C	0	0	0.588909	0.0101278	0.0234881
Fumarate	115	YAP5	YIR018W	0	0	-0.454152	0.0583231	0.0978538
Fumarate	115	FKH1	YIL131C	0	0	0.542864	0.0199137	0.0400159
L-Saccharopine	275.12	MET31	YPL038W	0	0	0.657158	0.00304355	0.00904544
NAD	662.1	GZF3	YJL110C	0	0	-0.584404	0.0108666	0.0246109
4-Aminobutanoate	102.06	MET32	YDR253C	0	0	-0.262432	0.292774	0.370278
2-(Formamido)-N1-(5-phospho-D-ribosyl)acetamidine	312.06	RIM101	YHL027W	0	0	-0.614097	0.00670368	0.0169788
2-(Formamido)-N1-(5-phospho-D-ribosyl)acetamidine	312.06	STE12	YHR084W	0	0	-0.870191	2.67639e-06	3.45579e-05
2-(Formamido)-N1-(5-phospho-D-ribosyl)acetamidine	312.06	STB5	YHR178W	0	0	-0.894403	5.55521e-07	1.29464e-05
Fumarate	115	STB5	YHR178W	0	0	0.581915	0.0112928	0.0252995
Pyruvate	87.01	MSN4	YKL062W	0	0	0.596761	0.00893677	0.0214281
NAD	662.1	INO4	YOL108C	0	0	-0.914533	1.0919e-07	4.74233e-06
Fumarate	115	STE12	YHR084W	0	0	0.663256	0.00269502	0.0081879
4-Aminobutanoate	102.06	YAP6	YDR259C	0	0	-0.20274	0.419764	0.490923
NAD	662.1	SIP4	YJL089W	0	0	0.853289	6.73945e-06	7.11552e-05
Fumarate	115	OPI1	YHL020C	0	0	0.589202	0.0100812	0.0234084
2-(Formamido)-N1-(5-phospho-D-ribosyl)acetamidine	312.06	MSN2	YMR037C	0	0	-0.880144	1.46071e-06	2.34538e-05
Fumarate	115	RGT1	YKL038W	0	0	0.586545	0.0105102	0.0241115
L-Saccharopine	275.12	INO4	YOL108C	0	0	-0.763917	0.000224122	0.00107883
L-Saccharopine	275.12	HAP5	YOR358W	0	0	-0.777567	0.000145844	0.000776344
4-Aminobutanoate	102.06	STE12	YHR084W	0	0	0.131175	0.603883	0.65944
L-Saccharopine	275.12	ADR1	YDR216W	0	0	-0.29803	0.229675	0.304798
L-Saccharopine	275.12	MET32	YDR253C	0	0	0.747521	0.000362399	0.00154586
L-Saccharopine	275.12	YAP6	YDR259C	0	0	0.708739	0.000992605	0.00345916
L-Saccharopine	275.12	SUM1	YDR310C	0	0	-0.592591	0.00955427	0.0224973
L-Saccharopine	275.12	CAD1	YDR423C	0	0	-0.3113	0.208591	0.281311
4-Aminobutanoate	102.06	STB5	YHR178W	0	0	0.244231	0.328721	0.402425
L-Saccharopine	275.12	YHP1	YDR451C	0	0	-0.614583	0.00664834	0.0169788
L-Saccharopine	275.12	STP1	YDR463W	0	0	-0.762038	0.000237255	0.00113066
NAD	662.1	SFP1	YLR403W	0	0	0.897729	4.34707e-07	1.17004e-05
Fumarate	115	AFT2	YPL202C	0	0	0.489849	0.0390629	0.0699618
L-Saccharopine	275.12	GLN3	YER040W	0	0	-0.787577	0.000104411	0.000615833
L-Saccharopine	275.12	SWI4	YER111C	0	0	-0.63399	0.00472143	0.0130197
NAD	662.1	HAP1	YLR256W	0	0	0.834173	1.68487e-05	0.000148377
Pyruvate	87.01	HAP5	YOR358W	0	0	0.573588	0.0128171	0.0280246
L-Saccharopine	275.12	RPH1	YER169W	0	0	-0.763917	0.000224122	0.00107883
Fumarate	115	MET31	YPL038W	0	0	-0.435489	0.0708586	0.11544
L-Saccharopine	275.12	PHO4	YFR034C	0	0	-0.583078	0.011092	0.0249588
Fumarate	115	HAP5	YOR358W	0	0	0.553169	0.0172547	0.0355321
Pyruvate	87.01	TYE7	YOR344C	0	0	-0.424093	0.0794326	0.127026
L-Saccharopine	275.12	HSF1	YGL073W	0	0	0.734181	0.00052232	0.0020454
NAD	662.1	RFX1	YLR176C	0	0	-0.925048	3.95141e-08	3.3932e-06
NAD	662.1	ACE2	YLR131C	0	0	-0.844931	1.02113e-05	9.90547e-05
Fumarate	115	TYE7	YOR344C	0	0	-0.490448	0.038788	0.0696653
NAD	662.1	FKH2	YNL068C	0	0	0.904361	2.59771e-07	8.00681e-06
Pyruvate	87.01	MET31	YPL038W	0	0	-0.463988	0.052426	0.0889753
Fumarate	115	CIN5	YOR028C	0	0	0.65204	0.00336381	0.00987442
NAD	662.1	SOK2	YMR016C	0	0	-0.914533	1.0919e-07	4.74233e-06
Inosine	267.07	AFT2	YPL202C	0	0	0.029181	0.908493	0.925936
4-Aminobutanoate	102.06	TEC1	YBR083W	0	0	0.287279	0.247725	0.324037
Inosine	267.07	GAL4	YPL248C	0	0	0.559842	0.0156884	0.0328015
gamma-Amino-gamma-cyanobutanoate	127.05	CAD1	YDR423C	0	0	-0.483628	0.0420082	0.0742625
gamma-Amino-gamma-cyanobutanoate	127.05	SUM1	YDR310C	0	0	-0.806624	5.2528e-05	0.00036768
Pyruvate	87.01	GAL4	YPL248C	0	0	-0.31629	0.201003	0.273392
gamma-Amino-gamma-cyanobutanoate	127.05	YAP6	YDR259C	0	0	0.762296	0.000235416	0.0011247
gamma-Amino-gamma-cyanobutanoate	127.05	MET32	YDR253C	0	0	0.776582	0.000150587	0.000794951
L-Saccharopine	275.12	REB1	YBR049C	0	0	0.583022	0.0111015	0.0249588
L-Saccharopine	275.12	TEC1	YBR083W	0	0	-0.756134	0.000282829	0.00128994
NAD	662.1	MSN2	YMR037C	0	0	-0.914533	1.0919e-07	4.74233e-06
L-Saccharopine	275.12	THI2	YBR240C	0	0	-0.573199	0.0128923	0.0281246
L-Saccharopine	275.12	RDS1	YCR106W	0	0	-0.522318	0.0261707	0.0501125
Pyruvate	87.01	AFT2	YPL202C	0	0	0.440997	0.0669691	0.110136
gamma-Amino-gamma-cyanobutanoate	127.05	RPN4	YDL020C	0	0	-0.724984	0.000663985	0.00245906
L-Saccharopine	275.12	MBP1	YDL056W	0	0	-0.68817	0.00159301	0.00524869
NAD	662.1	MAC1	YMR021C	0	0	-0.738461	0.000465599	0.00189311
L-Saccharopine	275.12	PHO2	YDL106C	0	0	-0.584805	0.0107991	0.0245097
L-Saccharopine	275.12	UGA3	YDL170W	0	0	-0.605177	0.00778803	0.0191776
L-Saccharopine	275.12	NRG1	YDR043C	0	0	-0.68319	0.00177652	0.00575733
L-Saccharopine	275.12	INO2	YDR123C	0	0	-0.763917	0.000224122	0.00107883
4-Aminobutanoate	102.06	OPI1	YHL020C	0	0	0.247986	0.321102	0.396655
4-Aminobutanoate	102.06	RDS1	YCR106W	0	0	0.125994	0.618369	0.672569
Fumarate	115	AZF1	YOR113W	0	0	0.546504	0.0189401	0.0383824
NAD	662.1	CHA4	YLR098C	0	0	-0.773207	0.000167823	0.000865666
L-Saccharopine	275.12	TYE7	YOR344C	0	0	0.623435	0.00570291	0.0150945
L-Saccharopine	275.12	CHA4	YLR098C	0	0	-0.602831	0.00809553	0.0197343
L-Saccharopine	275.12	ACE2	YLR131C	0	0	-0.663491	0.00268228	0.00817517
4-Aminobutanoate	102.06	PHO2	YDL106C	0	0	0.208556	0.406258	0.478054
L-Saccharopine	275.12	RFX1	YLR176C	0	0	-0.778463	0.000141645	0.000762281
L-Saccharopine	275.12	HAP1	YLR256W	0	0	0.717081	0.000810137	0.0028992
L-Saccharopine	275.12	SFP1	YLR403W	0	0	0.773327	0.000167186	0.000865666
L-Saccharopine	275.12	LEU3	YLR451W	0	0	-0.0977441	0.699609	0.745939
L-Saccharopine	275.12	YOX1	YML027W	0	0	-0.702054	0.00116243	0.00395121
L-Saccharopine	275.12	SOK2	YMR016C	0	0	-0.763917	0.000224122	0.00107883
Fumarate	115	MSN2	YMR037C	0	0	0.564258	0.0147154	0.0312109
L-Saccharopine	275.12	MAC1	YMR021C	0	0	-0.494599	0.0369228	0.0669444
4-Aminobutanoate	102.06	UGA3	YDL170W	0	0	0.327279	0.184937	0.255499
L-Saccharopine	275.12	MSN2	YMR037C	0	0	-0.763917	0.000224122	0.00107883
Pyruvate	87.01	MSN2	YMR037C	0	0	0.575079	0.0125328	0.0275924
Pyruvate	87.01	MAC1	YMR021C	0	0	0.444766	0.0644001	0.106645
Fumarate	115	STB4	YMR019W	0	0	0.475599	0.0460562	0.0796612
L-Saccharopine	275.12	FKH2	YNL068C	0	0	0.743402	0.000406629	0.00170037
L-Saccharopine	275.12	SKO1	YNL167C	0	0	-0.643736	0.0039419	0.0112432
L-Saccharopine	275.12	RAP1	YNL216W	0	0	0.768715	0.000193335	0.000972272
L-Saccharopine	275.12	DAL82	YNL314W	0	0	-0.49534	0.0365969	0.0664166
L-Saccharopine	275.12	YAP7	YOL028C	0	0	-0.356529	0.146428	0.212632
L-Saccharopine	275.12	CIN5	YOR028C	0	0	-0.763366	0.00022791	0.00109431
Pyruvate	87.01	STB4	YMR019W	0	0	0.553448	0.0171869	0.0354307
Fumarate	115	SOK2	YMR016C	0	0	0.564258	0.0147154	0.0312109
NAD	662.1	YAP7	YOL028C	0	0	-0.595701	0.00909051	0.0216608
L-Saccharopine	275.12	BAS1	YKR099W	0	0	0.630411	0.00503743	0.0137326
L-Saccharopine	275.12	RIM101	YHL027W	0	0	-0.565649	0.0144191	0.0308912
4-Aminobutanoate	102.06	MBP1	YDL056W	0	0	0.237003	0.343681	0.417264
L-Saccharopine	275.12	STE12	YHR084W	0	0	-0.611976	0.00694967	0.0174289
L-Saccharopine	275.12	STB5	YHR178W	0	0	-0.773891	0.000164204	0.000855025
Fumarate	115	INO4	YOL108C	0	0	0.564258	0.0147154	0.0312109
L-Saccharopine	275.12	XBP1	YIL101C	0	0	-0.708498	0.000998344	0.00346879
L-Saccharopine	275.12	FKH1	YIL131C	0	0	-0.748796	0.00034955	0.00150788
4-Aminobutanoate	102.06	SUT1	YGL162W	0	0	0.190921	0.447925	0.517837
L-Saccharopine	275.12	ZAP1	YJL056C	0	0	-0.817521	3.42621e-05	0.000262472
4-Aminobutanoate	102.06	XBP1	YIL101C	0	0	0.245646	0.325838	0.400268
Pyruvate	87.01	AZF1	YOR113W	0	0	0.615789	0.0065125	0.0167954
Pyruvate	87.01	CIN5	YOR028C	0	0	0.657378	0.00303032	0.00902016
L-Saccharopine	275.12	CBF1	YJR060W	0	0	0.445427	0.0639575	0.106093
Pyruvate	87.01	INO4	YOL108C	0	0	0.575079	0.0125328	0.0275924
Fumarate	115	RAP1	YNL216W	0	0	-0.62969	0.00510315	0.0138722
L-Saccharopine	275.12	SPT23	YKL020C	0	0	-0.644875	0.00385812	0.0110372
L-Saccharopine	275.12	RGT1	YKL038W	0	0	-0.785236	0.000113074	0.0006489
Pyruvate	87.01	YAP7	YOL028C	0	0	0.265854	0.286294	0.363286
L-Saccharopine	275.12	MSN4	YKL062W	0	0	-0.660021	0.00287559	0.00864033
Pyruvate	87.01	DAL82	YNL314W	0	0	0.235176	0.347523	0.420327
Fumarate	115	FKH2	YNL068C	0	0	-0.596389	0.00899054	0.02153
Pyruvate	87.01	RAP1	YNL216W	0	0	-0.591011	0.00979716	0.022891
Pyruvate	87.01	SKO1	YNL167C	0	0	0.563113	0.014963	0.031631
4-Aminobutanoate	102.06	FKH1	YIL131C	0	0	0.267584	0.283051	0.359887
Pyruvate	87.01	FKH2	YNL068C	0	0	-0.562256	0.0151505	0.031895
NAD	662.1	HAP5	YOR358W	0	0	-0.898182	4.20165e-07	1.14705e-05
Fumarate	115	UGA3	YDL170W	0	0	0.381564	0.11819	0.177564
Fumarate	115	INO2	YDR123C	0	0	0.564258	0.0147154	0.0312109
dUDP	387	SPT2	YER161C	0	0	-0.790125	9.56291e-05	0.000574677
L-Proline	114.06	STE12	YHR084W	0	0	0.823307	2.69967e-05	0.00021586
4-Aminobutanoate	102.06	ACE2	YLR131C	0	0	0.252777	0.311534	0.387865
dUDP	387	YAP6	YDR259C	0	0	0.779009	0.000139136	0.00075489
dUDP	387	SUM1	YDR310C	0	0	-0.83541	1.59352e-05	0.000141638
dUDP	387	CAD1	YDR423C	0	0	-0.513839	0.02916	0.0549012
L-Proline	114.06	HSF1	YGL073W	0	0	-0.833544	1.7331e-05	0.000151925
L-Proline	114.06	PHO4	YFR034C	0	0	0.552786	0.0173482	0.0356147
Pyruvate	87.01	INO2	YDR123C	0	0	0.575079	0.0125328	0.0275924
Pyruvate	87.01	PHO2	YDL106C	0	0	0.398526	0.101398	0.156016
dUDP	387	GLN3	YER040W	0	0	-0.913176	1.23313e-07	5.01385e-06
dUDP	387	SWI4	YER111C	0	0	-0.846032	9.68096e-06	9.53882e-05
NAD	662.1	SWI5	YDR146C	0	0	-0.69106	0.00149394	0.00494049
4-Aminobutanoate	102.06	CHA4	YLR098C	0	0	0.282629	0.255802	0.333677
L-Proline	114.06	RPH1	YER169W	0	0	0.790639	9.39333e-05	0.000566267
dUDP	387	PHO4	YFR034C	0	0	-0.734683	0.000515375	0.00202234
L-Proline	114.06	SPT2	YER161C	0	0	0.645777	0.00379276	0.0108665
Pyruvate	87.01	MBP1	YDL056W	0	0	0.540247	0.0206378	0.041254
L-Proline	114.06	SWI4	YER111C	0	0	0.703796	0.001116	0.00382198
L-Proline	114.06	GLN3	YER040W	0	0	0.800918	6.5021e-05	0.000429948
L-Proline	114.06	GCN4	YEL009C	0	0	0.684802	0.0017153	0.00562255
L-Proline	114.06	STP1	YDR463W	0	0	0.779421	0.000137267	0.000751626
L-Proline	114.06	YHP1	YDR451C	0	0	0.663377	0.00268847	0.008181
L-Proline	114.06	CAD1	YDR423C	0	0	0.314459	0.203766	0.27656
L-Proline	114.06	SUM1	YDR310C	0	0	0.68301	0.00178343	0.00576674
L-Proline	114.06	STB5	YHR178W	0	0	0.805598	5.46119e-05	0.000375381
L-Proline	114.06	FKH1	YIL131C	0	0	0.761167	0.000243561	0.00114925
2-(Formamido)-N1-(5-phospho-D-ribosyl)acetamidine	312.06	YAP7	YOL028C	0	0	-0.521452	0.0264646	0.0505739
L-Proline	114.06	DAL80	YKR034W	0	0	0.339186	0.168523	0.238201
L-Proline	114.06	HAP1	YLR256W	0	0	-0.786143	0.000109649	0.000634968
Xanthosine 5-phosphate	363.03	GCR1	YPL075W	0	0	-0.153568	0.542933	0.607818
Pyruvate	87.01	SUM1	YDR310C	0	0	0.393701	0.105989	0.161906
Xanthosine 5-phosphate	363.03	AFT2	YPL202C	0	0	0.478469	0.0445769	0.0778669
L-Proline	114.06	RFX1	YLR176C	0	0	0.840526	1.25906e-05	0.000116799
Inosine	267.07	GCR1	YPL075W	0	0	0.273388	0.272337	0.350226
NAD	662.1	STP1	YDR463W	0	0	-0.894558	5.49309e-07	1.29464e-05
NAD	662.1	YHP1	YDR451C	0	0	-0.786525	0.000108231	0.00063058
L-Proline	114.06	ACE2	YLR131C	0	0	0.673614	0.00217854	0.00688132
dUDP	387	HAP3	YBL021C	0	0	-0.821749	2.88102e-05	0.000225641
L-Proline	114.06	CHA4	YLR098C	0	0	0.694878	0.00137093	0.00458016
dUDP	387	SMP1	YBR182C	0	0	0.252125	0.312826	0.388622
NAD	662.1	AFT2	YPL202C	0	0	-0.805504	5.48045e-05	0.000375381
NAD	662.1	CAD1	YDR423C	0	0	-0.472094	0.0479138	0.0824152
NAD	662.1	SUM1	YDR310C	0	0	-0.789512	9.76824e-05	0.000583347
Pyruvate	87.01	YAP6	YDR259C	0	0	-0.457271	0.0564015	0.0949632
Pyruvate	87.01	MET32	YDR253C	0	0	-0.477797	0.0449198	0.0782913
NAD	662.1	YAP6	YDR259C	0	0	0.758025	0.000267493	0.00123473
4-Aminobutanoate	102.06	GLN3	YER040W	0	0	0.256184	0.304834	0.383754
L-Proline	114.06	RGT1	YKL038W	0	0	0.810356	4.55147e-05	0.000333251
dUDP	387	RPN4	YDL020C	0	0	-0.757646	0.000270512	0.00124566
L-Proline	114.06	SPT23	YKL020C	0	0	0.783377	0.00012038	0.000686705
L-Proline	114.06	GZF3	YJL110C	0	0	0.22418	0.371164	0.442519
L-Proline	114.06	ZAP1	YJL056C	0	0	0.81954	3.15585e-05	0.000243179
4-Aminobutanoate	102.06	RFX1	YLR176C	0	0	0.211451	0.399625	0.472576
dUDP	387	SKN7	YHR206W	0	0	-0.624461	0.00560082	0.0148862
4-Aminobutanoate	102.06	SWI4	YER111C	0	0	0.240945	0.335474	0.409381
dUDP	387	INO4	YOL108C	0	0	-0.910302	1.58528e-07	5.40978e-06
dUDP	387	SOK2	YMR016C	0	0	-0.910302	1.58528e-07	5.40978e-06
dUDP	387	STB4	YMR019W	0	0	-0.821997	2.8514e-05	0.000224919
4-Aminobutanoate	102.06	GCR1	YPL075W	0	0	-0.126475	0.617017	0.67148
dUDP	387	MSN2	YMR037C	0	0	-0.910302	1.58528e-07	5.40978e-06
4-Aminobutanoate	102.06	MET31	YPL038W	0	0	-0.372835	0.127557	0.189535
4-Aminobutanoate	102.06	HAP5	YOR358W	0	0	0.300527	0.225608	0.300863
dUDP	387	CRZ1	YNL027W	0	0	-0.505311	0.0324267	0.0603382
4-Aminobutanoate	102.06	STB4	YMR019W	0	0	0.246427	0.324253	0.399773
4-Aminobutanoate	102.06	AZF1	YOR113W	0	0	0.238045	0.341501	0.415409
4-Aminobutanoate	102.06	CIN5	YOR028C	0	0	0.181394	0.471309	0.538546
dUDP	387	DAL82	YNL314W	0	0	-0.625554	0.00549362	0.0146606
4-Aminobutanoate	102.06	INO4	YOL108C	0	0	0.253265	0.31057	0.387401
L-Proline	114.06	YAP6	YDR259C	0	0	-0.742109	0.000421426	0.00174317
4-Aminobutanoate	102.06	YAP7	YOL028C	0	0	0.15016	0.552025	0.615473
4-Aminobutanoate	102.06	DAL82	YNL314W	0	0	0.334982	0.174202	0.2446
4-Aminobutanoate	102.06	MAC1	YMR021C	0	0	0.252769	0.31155	0.387865
dUDP	387	HAP5	YOR358W	0	0	-0.888615	8.35433e-07	1.75907e-05
dUDP	387	MET31	YPL038W	0	0	0.798265	7.16398e-05	0.000462513
dUDP	387	GCR1	YPL075W	0	0	0.895619	5.0836e-07	1.29464e-05
4-Aminobutanoate	102.06	GAT1	YFL021W	0	0	0.0593086	0.815167	0.847543
4-Aminobutanoate	102.06	RAP1	YNL216W	0	0	-0.225307	0.368702	0.440633
dUDP	387	AFT2	YPL202C	0	0	-0.84111	1.225e-05	0.000115319
4-Aminobutanoate	102.06	FKH2	YNL068C	0	0	-0.234261	0.349456	0.422131
4-Aminobutanoate	102.06	MSN2	YMR037C	0	0	0.253265	0.31057	0.387401
dUDP	387	YOX1	YML027W	0	0	-0.703943	0.00111217	0.00381573
4-Aminobutanoate	102.06	SOK2	YMR016C	0	0	0.253265	0.31057	0.387401
Pyruvate	87.01	PDR3	YBL005W	0	0	0.672305	0.00223889	0.00703703
4-Aminobutanoate	102.06	AFT2	YPL202C	0	0	0.328842	0.182724	0.253953
L-Proline	114.06	MET32	YDR253C	0	0	-0.650379	0.00347348	0.0100726
dUDP	387	YAP5	YIR018W	0	0	0.546548	0.0189285	0.0383824
L-Proline	114.06	SWI5	YDR146C	0	0	0.604811	0.0078354	0.0192214
L-Proline	114.06	INO2	YDR123C	0	0	0.790639	9.39333e-05	0.000566267
Pyruvate	87.01	THI2	YBR240C	0	0	0.208369	0.406689	0.478266
4-Aminobutanoate	102.06	SPT2	YER161C	0	0	0.347289	0.157935	0.22574
dUDP	387	GZF3	YJL110C	0	0	-0.395938	0.103843	0.158882
4-Aminobutanoate	102.06	SFP1	YLR403W	0	0	-0.187173	0.457052	0.526795
L-Proline	114.06	NRG1	YDR043C	0	0	0.76569	0.000212295	0.00104561
NAD	662.1	MBP1	YDL056W	0	0	-0.865326	3.53547e-06	4.17055e-05
L-Proline	114.06	PHO2	YDL106C	0	0	0.713572	0.000883139	0.00311955
4-Aminobutanoate	102.06	RPH1	YER169W	0	0	0.253265	0.31057	0.387401
L-Proline	114.06	RPN4	YDL020C	0	0	0.682212	0.00181449	0.00583754
L-Proline	114.06	SMP1	YBR182C	0	0	-0.367171	0.133907	0.197756
dUDP	387	DAL80	YKR034W	0	0	-0.519032	0.0272995	0.0519616
L-Proline	114.06	HAP3	YBL021C	0	0	0.703508	0.00112358	0.00384107
dUDP	387	CHA4	YLR098C	0	0	-0.837234	1.46648e-05	0.000130955
dUDP	387	ACE2	YLR131C	0	0	-0.837507	1.44821e-05	0.000129931
dUDP	387	RFX1	YLR176C	0	0	-0.924729	4.08391e-08	3.3932e-06
4-Aminobutanoate	102.06	HSF1	YGL073W	0	0	-0.188394	0.45407	0.524306
4-Aminobutanoate	102.06	ROX1	YPR065W	0	0	0.183529	0.466017	0.534229
NAD	662.1	THI2	YBR240C	0	0	-0.632102	0.00488608	0.013435
4-Aminobutanoate	102.06	GAL4	YPL248C	0	0	0.201156	0.423481	0.494967
Xanthosine 5-phosphate	363.03	HAP5	YOR358W	0	0	0.326831	0.185574	0.255499
Xanthosine 5-phosphate	363.03	AZF1	YOR113W	0	0	0.392635	0.107023	0.163095
Xanthosine 5-phosphate	363.03	CIN5	YOR028C	0	0	0.380889	0.118896	0.178426
Xanthosine 5-phosphate	363.03	GLN3	YER040W	0	0	0.326556	0.185966	0.255744
Xanthosine 5-phosphate	363.03	SWI5	YDR146C	0	0	0.433702	0.0721553	0.117352
Fumarate	115	HAP3	YBL021C	0	0	0.458838	0.0554543	0.0936986
L-Proline	114.06	AFT2	YPL202C	0	0	0.704277	0.00110348	0.0037927
Xanthosine 5-phosphate	363.03	MET32	YDR253C	0	0	-0.403124	0.0971583	0.150218
Xanthosine 5-phosphate	363.03	YAP6	YDR259C	0	0	-0.024224	0.92399	0.938727
Xanthosine 5-phosphate	363.03	SUM1	YDR310C	0	0	0.445681	0.0637881	0.105907
4-Aminobutanoate	102.06	CAD1	YDR423C	0	0	0.331409	0.179127	0.250228
Pyruvate	87.01	STB5	YHR178W	0	0	0.568242	0.0138792	0.0299359
Xanthosine 5-phosphate	363.03	YHP1	YDR451C	0	0	0.487414	0.0401964	0.0713897
Xanthosine 5-phosphate	363.03	STP1	YDR463W	0	0	0.421863	0.0811957	0.129304
NAD	662.1	MET31	YPL038W	0	0	0.787221	0.000105691	0.000619554
4-Aminobutanoate	102.06	ASH1	YKL185W	0	0	0.206556	0.410876	0.481708
Pyruvate	87.01	OPI1	YHL020C	0	0	0.600802	0.00836924	0.0202965
Xanthosine 5-phosphate	363.03	SWI4	YER111C	0	0	0.329612	0.18164	0.252631
Xanthosine 5-phosphate	363.03	SPT2	YER161C	0	0	0.467132	0.0506395	0.0864808
Xanthosine 5-phosphate	363.03	RPH1	YER169W	0	0	0.327028	0.185295	0.255499
Pyruvate	87.01	STE12	YHR084W	0	0	0.498994	0.0350234	0.0642937
4-Aminobutanoate	102.06	HAP2	YGL237C	0	0	-0.175595	0.485834	0.552307
Pyruvate	87.01	RIM101	YHL027W	0	0	0.270515	0.277608	0.354855
Xanthosine 5-phosphate	363.03	PHO4	YFR034C	0	0	0.474766	0.0464926	0.0802596
L-Proline	114.06	MET31	YPL038W	0	0	-0.662057	0.00276082	0.00833481
Xanthosine 5-phosphate	363.03	HSF1	YGL073W	0	0	-0.209271	0.404614	0.476413
L-Proline	114.06	HAP5	YOR358W	0	0	0.782416	0.00012431	0.000696645
Xanthosine 5-phosphate	363.03	SUT1	YGL162W	0	0	0.413843	0.0877728	0.137939
Xanthosine 5-phosphate	363.03	INO2	YDR123C	0	0	0.327028	0.185295	0.255499
Pyruvate	87.01	XBP1	YIL101C	0	0	0.548397	0.0184488	0.037586
Xanthosine 5-phosphate	363.03	UGA3	YDL170W	0	0	0.504173	0.0328833	0.061069
Xanthosine 5-phosphate	363.03	PHO2	YDL106C	0	0	0.467643	0.0503534	0.0860692
Pyruvate	87.01	ZAP1	YJL056C	0	0	0.643929	0.00392761	0.0112192
2-(Formamido)-N1-(5-phospho-D-ribosyl)acetamidine	312.06	INO4	YOL108C	0	0	-0.880144	1.46071e-06	2.34538e-05
Fumarate	115	NRG1	YDR043C	0	0	0.59119	0.00976933	0.0228789
NAD	662.1	RIM101	YHL027W	0	0	-0.684501	0.00172659	0.00564019
2-(Formamido)-N1-(5-phospho-D-ribosyl)acetamidine	312.06	HAP5	YOR358W	0	0	-0.867137	3.19143e-06	3.8846e-05
2-(Formamido)-N1-(5-phospho-D-ribosyl)acetamidine	312.06	MET31	YPL038W	0	0	0.726388	0.000640481	0.00239522
4-Aminobutanoate	102.06	SPT23	YKL020C	0	0	0.252882	0.311326	0.387865
2-(Formamido)-N1-(5-phospho-D-ribosyl)acetamidine	312.06	GCR1	YPL075W	0	0	0.889636	7.78694e-07	1.69101e-05
4-Aminobutanoate	102.06	RGT1	YKL038W	0	0	0.240107	0.337209	0.411236
2-(Formamido)-N1-(5-phospho-D-ribosyl)acetamidine	312.06	AFT2	YPL202C	0	0	-0.76751	0.000200711	0.00100146
Fumarate	115	PHO2	YDL106C	0	0	0.543786	0.0196634	0.039638
Fumarate	115	MBP1	YDL056W	0	0	0.634434	0.0046834	0.0129335
Fumarate	115	RPN4	YDL020C	0	0	0.415847	0.0860944	0.135748
Xanthosine 5-phosphate	363.03	PDR3	YBL005W	0	0	0.251915	0.313243	0.388706
4-Aminobutanoate	102.06	MSN4	YKL062W	0	0	0.1225	0.628212	0.68095
Pyruvate	87.01	YAP5	YIR018W	0	0	-0.532649	0.0228576	0.044847
Xanthosine 5-phosphate	363.03	REB1	YBR049C	0	0	0.0444121	0.861093	0.884229
Xanthosine 5-phosphate	363.03	TEC1	YBR083W	0	0	0.270821	0.277043	0.354608
Fumarate	115	THI2	YBR240C	0	0	0.272228	0.274457	0.352241
Fumarate	115	TEC1	YBR083W	0	0	0.536667	0.0216616	0.0428966
Pyruvate	87.01	FKH1	YIL131C	0	0	0.519683	0.0270729	0.0515816
Xanthosine 5-phosphate	363.03	RPN4	YDL020C	0	0	0.262039	0.293524	0.370736
Xanthosine 5-phosphate	363.03	MBP1	YDL056W	0	0	0.343815	0.162418	0.230939
Xanthosine 5-phosphate	363.03	HAP2	YGL237C	0	0	0.013952	0.956181	0.96273
Xanthosine 5-phosphate	363.03	OPI1	YHL020C	0	0	0.219665	0.381127	0.453508
Xanthosine 5-phosphate	363.03	INO4	YOL108C	0	0	0.327028	0.185295	0.255499
Xanthosine 5-phosphate	363.03	SOK2	YMR016C	0	0	0.327028	0.185295	0.255499
NAD	662.1	RLM1	YPL089C	0	0	0.494128	0.0371308	0.0671953
Xanthosine 5-phosphate	363.03	CHA4	YLR098C	0	0	0.520443	0.0268104	0.0511324
Pyruvate	87.01	GLN3	YER040W	0	0	0.612292	0.00691258	0.0174044
Xanthosine 5-phosphate	363.03	ACE2	YLR131C	0	0	0.364988	0.136413	0.201146
Xanthosine 5-phosphate	363.03	RFX1	YLR176C	0	0	0.247419	0.322246	0.397812
L-Proline	114.06	SOK2	YMR016C	0	0	0.790639	9.39333e-05	0.000566267
Pyruvate	87.01	GCN4	YEL009C	0	0	0.568525	0.0138214	0.0298785
Xanthosine 5-phosphate	363.03	SFP1	YLR403W	0	0	-0.19981	0.426655	0.497461
L-Proline	114.06	YOX1	YML027W	0	0	0.553924	0.0170715	0.0352687
NAD	662.1	SPT2	YER161C	0	0	-0.828456	2.16789e-05	0.000183312
Xanthosine 5-phosphate	363.03	YOX1	YML027W	0	0	0.413096	0.0884053	0.13879
Xanthosine 5-phosphate	363.03	STB4	YMR019W	0	0	0.0864272	0.733108	0.772625
Xanthosine 5-phosphate	363.03	RIM101	YHL027W	0	0	0.250808	0.315445	0.390677
Xanthosine 5-phosphate	363.03	MAC1	YMR021C	0	0	0.524729	0.0253661	0.0488655
Xanthosine 5-phosphate	363.03	MSN2	YMR037C	0	0	0.327028	0.185295	0.255499
NAD	662.1	SWI4	YER111C	0	0	-0.822224	2.82457e-05	0.000223973
Xanthosine 5-phosphate	363.03	MOT3	YMR070W	0	0	0.318004	0.198438	0.270289
Pyruvate	87.01	STP1	YDR463W	0	0	0.58402	0.0109314	0.0246926
Xanthosine 5-phosphate	363.03	FKH2	YNL068C	0	0	-0.314038	0.204405	0.277034
Pyruvate	87.01	YHP1	YDR451C	0	0	0.382838	0.116864	0.176126
Pyruvate	87.01	CAD1	YDR423C	0	0	0.113684	0.65332	0.704171
Xanthosine 5-phosphate	363.03	RAP1	YNL216W	0	0	-0.246089	0.324937	0.400194
Xanthosine 5-phosphate	363.03	DAL82	YNL314W	0	0	0.607822	0.00745264	0.0184721
L-Proline	114.06	SFP1	YLR403W	0	0	-0.848591	8.53847e-06	8.72568e-05
Pyruvate	87.01	SWI4	YER111C	0	0	0.439987	0.0676701	0.110812
L-Proline	114.06	STB4	YMR019W	0	0	0.730817	0.000570858	0.00218619
Xanthosine 5-phosphate	363.03	ASH1	YKL185W	0	0	0.330513	0.180378	0.251241
4-Aminobutanoate	102.06	BAS1	YKR099W	0	0	-0.0144929	0.954484	0.962521
4-Aminobutanoate	102.06	YHP1	YDR451C	0	0	0.279191	0.261878	0.340441
Xanthosine 5-phosphate	363.03	STE12	YHR084W	0	0	0.336456	0.172197	0.242855
Pyruvate	87.01	SUT1	YGL162W	0	0	0.660511	0.00284763	0.00858331
Xanthosine 5-phosphate	363.03	STB5	YHR178W	0	0	0.277997	0.264009	0.342241
NAD	662.1	GCR1	YPL075W	0	0	0.830896	1.949e-05	0.000169297
Pyruvate	87.01	HSF1	YGL073W	0	0	-0.543652	0.0196996	0.0396691
L-Proline	114.06	INO4	YOL108C	0	0	0.790639	9.39333e-05	0.000566267
L-Proline	114.06	YAP7	YOL028C	0	0	0.483731	0.041958	0.0742424
Pyruvate	87.01	PHO4	YFR034C	0	0	0.284314	0.252855	0.330059
4-Aminobutanoate	102.06	STP1	YDR463W	0	0	0.280101	0.26026	0.338799
Xanthosine 5-phosphate	363.03	ZAP1	YJL056C	0	0	0.291337	0.24081	0.316427
Xanthosine 5-phosphate	363.03	SIP4	YJL089W	0	0	-0.382076	0.117656	0.177039
L-Proline	114.06	FKH2	YNL068C	0	0	-0.808579	4.87488e-05	0.000346316
Pyruvate	87.01	RPH1	YER169W	0	0	0.575079	0.0125328	0.0275924
L-Proline	114.06	CRZ1	YNL027W	0	0	0.317477	0.199225	0.271167
L-Proline	114.06	MSN2	YMR037C	0	0	0.790639	9.39333e-05	0.000566267
4-Aminobutanoate	102.06	DAL80	YKR034W	0	0	0.300028	0.226417	0.301311
Xanthosine 5-phosphate	363.03	SPT23	YKL020C	0	0	0.44156	0.0665807	0.109686
Xanthosine 5-phosphate	363.03	RGT1	YKL038W	0	0	0.330954	0.179762	0.250749
Pyruvate	87.01	SPT2	YER161C	0	0	0.572199	0.0130866	0.0284835
Xanthosine 5-phosphate	363.03	MSN4	YKL062W	0	0	0.407668	0.0930952	0.144874
NAD	662.1	PHO4	YFR034C	0	0	-0.721394	0.00072738	0.00264263
L-Proline	114.06	MAC1	YMR021C	0	0	0.679522	0.00192253	0.00613347
Xanthosine 5-phosphate	363.03	ROX1	YPR065W	0	0	0.0805536	0.750681	0.789517
Xanthine	151.03	SUT1	YGL162W	0	0	-0.210725	0.401283	0.473728
Inosine	267.07	MET31	YPL038W	0	0	-0.0350391	0.890219	0.90828
Hypoxanthine	135.03	RAP1	YNL216W	0	0	0.399617	0.100381	0.154575
O-Phospho-L-serine	184	REB1	YBR049C	0	0	-0.350021	0.154471	0.222345
O-Phospho-L-serine	184	HAP3	YBL021C	0	0	0.543302	0.0197946	0.0398184
O-Phospho-L-serine	184	PDR3	YBL005W	0	0	0.380239	0.11958	0.178948
Hypoxanthine	135.03	MSN2	YMR037C	0	0	-0.273573	0.272	0.350028
Hypoxanthine	135.03	FKH2	YNL068C	0	0	0.297204	0.231031	0.305537
L-Citrulline	174.09	AFT2	YPL202C	0	0	-0.594777	0.00922648	0.0218917
L-Citrulline	174.09	GCR1	YPL075W	0	0	0.787101	0.000106125	0.0006202
L-Citrulline	174.09	RAP1	YNL216W	0	0	0.754432	0.000297262	0.00132417
L-Citrulline	174.09	MET31	YPL038W	0	0	0.556034	0.0165677	0.0343022
L-Citrulline	174.09	HAP5	YOR358W	0	0	-0.70869	0.000993761	0.00345916
L-Citrulline	174.09	TYE7	YOR344C	0	0	0.565983	0.0143487	0.0307748
Hypoxanthine	135.03	YAP7	YOL028C	0	0	0.245819	0.325487	0.400268
L-Citrulline	174.09	INO4	YOL108C	0	0	-0.73567	0.00050196	0.00198191
L-Citrulline	174.09	YAP7	YOL028C	0	0	-0.40302	0.0972532	0.150243
O-Phospho-L-serine	184	TEC1	YBR083W	0	0	0.614275	0.0066834	0.0169788
Hypoxanthine	135.03	MAC1	YMR021C	0	0	-0.00418751	0.986843	0.988804
O-Phospho-L-serine	184	RDS1	YCR106W	0	0	0.441061	0.0669246	0.110136
Hypoxanthine	135.03	STB4	YMR019W	0	0	-0.426759	0.0773617	0.124338
O-Phospho-L-serine	184	MBP1	YDL056W	0	0	0.582867	0.0111282	0.0249894
O-Phospho-L-serine	184	PHO2	YDL106C	0	0	0.490589	0.0387236	0.069615
O-Phospho-L-serine	184	UGA3	YDL170W	0	0	0.535569	0.0219833	0.0434436
O-Phospho-L-serine	184	NRG1	YDR043C	0	0	0.509144	0.0309251	0.0578823
O-Phospho-L-serine	184	INO2	YDR123C	0	0	0.585194	0.0107339	0.0243906
O-Phospho-L-serine	184	SWI5	YDR146C	0	0	0.428198	0.0762611	0.122936
O-Phospho-L-serine	184	UME6	YDR207C	0	0	0.527331	0.0245193	0.0475699
Hypoxanthine	135.03	SOK2	YMR016C	0	0	-0.273573	0.272	0.350028
O-Phospho-L-serine	184	MET32	YDR253C	0	0	-0.529043	0.0239742	0.0467497
O-Phospho-L-serine	184	YAP6	YDR259C	0	0	-0.584386	0.0108695	0.0246109
O-Phospho-L-serine	184	SUM1	YDR310C	0	0	0.469879	0.049116	0.0843313
O-Phospho-L-serine	184	CAD1	YDR423C	0	0	0.326916	0.185454	0.255499
O-Phospho-L-serine	184	YHP1	YDR451C	0	0	0.515054	0.0287161	0.0541722
Hypoxanthine	135.03	INO4	YOL108C	0	0	-0.273573	0.272	0.350028
L-Citrulline	174.09	FKH2	YNL068C	0	0	0.740904	0.000435613	0.00179023
Inosine	267.07	HAP5	YOR358W	0	0	-0.176856	0.482658	0.549024
L-Citrulline	174.09	GZF3	YJL110C	0	0	-0.305919	0.216983	0.291599
L-Glutamine	145.06	SUM1	YDR310C	0	0	-0.806335	5.31077e-05	0.00036905
L-Glutamine	145.06	CAD1	YDR423C	0	0	-0.491716	0.0382106	0.0688222
L-Citrulline	174.09	RGT1	YKL038W	0	0	-0.761265	0.000242843	0.00114879
L-Citrulline	174.09	SPT23	YKL020C	0	0	-0.696744	0.00131395	0.00439746
L-Glutamine	145.06	STP1	YDR463W	0	0	-0.860476	4.61763e-06	5.25255e-05
L-Glutamine	145.06	GCN4	YEL009C	0	0	-0.783141	0.000121333	0.000688035
L-Citrulline	174.09	SIP4	YJL089W	0	0	0.651727	0.00338428	0.00988892
Hypoxanthine	135.03	CIN5	YOR028C	0	0	-0.31491	0.203083	0.276025
L-Citrulline	174.09	ZAP1	YJL056C	0	0	-0.783142	0.000121333	0.000688035
L-Glutamine	145.06	GLN3	YER040W	0	0	-0.871299	2.50823e-06	3.32863e-05
L-Glutamine	145.06	SWI4	YER111C	0	0	-0.807883	5.00665e-05	0.000353052
L-Citrulline	174.09	STB5	YHR178W	0	0	-0.748278	0.000354726	0.00152333
L-Citrulline	174.09	STE12	YHR084W	0	0	-0.732197	0.000550513	0.00213827
L-Citrulline	174.09	RIM101	YHL027W	0	0	-0.452392	0.0594284	0.0994463
L-Glutamine	145.06	YAP6	YDR259C	0	0	0.747559	0.000362005	0.00154586
L-Glutamine	145.06	MET32	YDR253C	0	0	0.766115	0.000209538	0.00103699
L-Glutamine	145.06	RPN4	YDL020C	0	0	-0.699081	0.00124537	0.00418259
L-Citrulline	174.09	DAL80	YKR034W	0	0	-0.194818	0.438535	0.510067
L-Citrulline	174.09	CHA4	YLR098C	0	0	-0.587473	0.0103588	0.0239238
L-Citrulline	174.09	ACE2	YLR131C	0	0	-0.639356	0.00427803	0.012058
L-Citrulline	174.09	RFX1	YLR176C	0	0	-0.800514	6.59932e-05	0.000434872
L-Glutamine	145.06	HAP3	YBL021C	0	0	-0.764903	0.000217476	0.0010602
L-Citrulline	174.09	HAP1	YLR256W	0	0	0.679635	0.00191789	0.00612891
L-Citrulline	174.09	SFP1	YLR403W	0	0	0.772215	0.0001732	0.000884986
Hypoxanthine	135.03	AFT2	YPL202C	0	0	-0.107847	0.670142	0.719461
Hypoxanthine	135.03	GCR1	YPL075W	0	0	0.580911	0.0114686	0.0256633
Hypoxanthine	135.03	MET31	YPL038W	0	0	0.0498303	0.844332	0.872172
L-Citrulline	174.09	SOK2	YMR016C	0	0	-0.73567	0.00050196	0.00198191
L-Citrulline	174.09	MAC1	YMR021C	0	0	-0.563594	0.0148586	0.031445
L-Citrulline	174.09	MSN2	YMR037C	0	0	-0.73567	0.00050196	0.00198191
Hypoxanthine	135.03	HAP5	YOR358W	0	0	-0.300297	0.225981	0.30115
O-Phospho-L-serine	184	STP1	YDR463W	0	0	0.60151	0.00827294	0.0200884
O-Phospho-L-serine	184	GCN4	YEL009C	0	0	0.559649	0.0157321	0.0328568
O-Phospho-L-serine	184	GLN3	YER040W	0	0	0.597444	0.00883868	0.0212998
O-Phospho-L-serine	184	FKH2	YNL068C	0	0	-0.58314	0.0110813	0.0249588
O-Phospho-L-serine	184	CIN5	YOR028C	0	0	0.545931	0.0190909	0.0386469
O-Phospho-L-serine	184	INO4	YOL108C	0	0	0.585194	0.0107339	0.0243906
O-Phospho-L-serine	184	YAP7	YOL028C	0	0	0.271689	0.275447	0.352801
O-Phospho-L-serine	184	DAL82	YNL314W	0	0	0.426644	0.0774507	0.124377
Hypoxanthine	135.03	FKH1	YIL131C	0	0	-0.314559	0.203614	0.27655
Hypoxanthine	135.03	ZAP1	YJL056C	0	0	-0.335554	0.173422	0.243863
O-Phospho-L-serine	184	CRZ1	YNL027W	0	0	0.378771	0.121132	0.180988
O-Phospho-L-serine	184	SPT2	YER161C	0	0	0.612642	0.00687168	0.0173242
Hypoxanthine	135.03	SIP4	YJL089W	0	0	0.1511	0.54951	0.613027
O-Phospho-L-serine	184	MSN2	YMR037C	0	0	0.585194	0.0107339	0.0243906
O-Phospho-L-serine	184	MAC1	YMR021C	0	0	0.497829	0.0355196	0.0650171
O-Phospho-L-serine	184	STB4	YMR019W	0	0	0.619063	0.00615516	0.0160471
O-Phospho-L-serine	184	SOK2	YMR016C	0	0	0.585194	0.0107339	0.0243906
Hypoxanthine	135.03	CBF1	YJR060W	0	0	0.213241	0.395552	0.468921
O-Phospho-L-serine	184	AZF1	YOR113W	0	0	0.549444	0.0181814	0.0371203
O-Phospho-L-serine	184	HAP5	YOR358W	0	0	0.632269	0.00487132	0.0134137
O-Phospho-L-serine	184	MET31	YPL038W	0	0	-0.594731	0.00923324	0.0218917
Hypoxanthine	135.03	STB5	YHR178W	0	0	-0.326984	0.185357	0.255499
Hypoxanthine	135.03	STE12	YHR084W	0	0	-0.296413	0.232335	0.307049
O-Phospho-L-serine	184	AFT2	YPL202C	0	0	0.594054	0.00933383	0.0220957
Hypoxanthine	135.03	RIM101	YHL027W	0	0	-0.125297	0.620328	0.673932
O-Phospho-L-serine	184	ROX1	YPR065W	0	0	0.610348	0.00714343	0.0178378
O-Phospho-L-serine	184	ARR1	YPR199C	0	0	0.0355488	0.888631	0.907144
But-1-ene-1,2,4-tricarboxylate	187.02	HAP3	YBL021C	0	0	-0.664447	0.00263095	0.00803153
But-1-ene-1,2,4-tricarboxylate	187.02	THI2	YBR240C	0	0	-0.477753	0.0449427	0.0782913
Hypoxanthine	135.03	SUT1	YGL162W	0	0	-0.23023	0.358049	0.430334
But-1-ene-1,2,4-tricarboxylate	187.02	RPN4	YDL020C	0	0	-0.596825	0.00892753	0.0214281
But-1-ene-1,2,4-tricarboxylate	187.02	MBP1	YDL056W	0	0	-0.765178	0.000215653	0.001054
But-1-ene-1,2,4-tricarboxylate	187.02	PHO2	YDL106C	0	0	-0.707652	0.00101871	0.00352674
But-1-ene-1,2,4-tricarboxylate	187.02	UGA3	YDL170W	0	0	-0.558435	0.016009	0.0333259
But-1-ene-1,2,4-tricarboxylate	187.02	INO2	YDR123C	0	0	-0.731674	0.000558153	0.00214183
O-Phospho-L-serine	184	YAP1	YML007W	0	0	-0.206613	0.410743	0.481708
Hypoxanthine	135.03	SPT23	YKL020C	0	0	-0.234127	0.34974	0.422207
O-Phospho-L-serine	184	SFP1	YLR403W	0	0	-0.567643	0.0140025	0.0300728
O-Phospho-L-serine	184	FKH1	YIL131C	0	0	0.607884	0.00744492	0.0184721
O-Phospho-L-serine	184	RPH1	YER169W	0	0	0.585194	0.0107339	0.0243906
O-Phospho-L-serine	184	PHO4	YFR034C	0	0	0.528326	0.0242015	0.0470967
Hypoxanthine	135.03	YOX1	YML027W	0	0	-0.000828781	0.997396	0.997396
O-Phospho-L-serine	184	HSF1	YGL073W	0	0	-0.562467	0.0151041	0.0318585
Hypoxanthine	135.03	SFP1	YLR403W	0	0	0.462269	0.0534226	0.0905059
O-Phospho-L-serine	184	SUT1	YGL162W	0	0	0.507474	0.0315726	0.0588636
Hypoxanthine	135.03	RFX1	YLR176C	0	0	-0.419394	0.083181	0.131698
O-Phospho-L-serine	184	YAP3	YHL009C	0	0	-0.380304	0.119511	0.178948
O-Phospho-L-serine	184	OPI1	YHL020C	0	0	0.618148	0.0062534	0.0162147
O-Phospho-L-serine	184	RIM101	YHL027W	0	0	0.406965	0.093716	0.145603
O-Phospho-L-serine	184	STE12	YHR084W	0	0	0.487996	0.0399232	0.0709704
O-Phospho-L-serine	184	STB5	YHR178W	0	0	0.59707	0.00889231	0.0213751
Hypoxanthine	135.03	ACE2	YLR131C	0	0	-0.115988	0.646724	0.697849
O-Phospho-L-serine	184	XBP1	YIL101C	0	0	0.599543	0.00854277	0.0206649
Hypoxanthine	135.03	CHA4	YLR098C	0	0	-0.0485546	0.848273	0.873881
O-Phospho-L-serine	184	HAP1	YLR256W	0	0	-0.64047	0.00419044	0.0118812
O-Phospho-L-serine	184	ZAP1	YJL056C	0	0	0.624102	0.00563631	0.014939
4-Aminobutanoate	102.06	HAP3	YBL021C	0	0	0.185263	0.46174	0.529961
O-Phospho-L-serine	184	PUT3	YKL015W	0	0	0.0895024	0.723957	0.7652
O-Phospho-L-serine	184	SPT23	YKL020C	0	0	0.590103	0.00993889	0.0231625
O-Phospho-L-serine	184	RGT1	YKL038W	0	0	0.591225	0.00976395	0.0228789
Hypoxanthine	135.03	MSN4	YKL062W	0	0	-0.333632	0.176052	0.246796
O-Phospho-L-serine	184	MSN4	YKL062W	0	0	0.501582	0.0339408	0.0625467
O-Phospho-L-serine	184	ABF1	YKL112W	0	0	-0.232262	0.353702	0.426182
O-Phospho-L-serine	184	ASH1	YKL185W	0	0	0.579625	0.0116968	0.0260824
O-Phospho-L-serine	184	DAL80	YKR034W	0	0	0.298832	0.228364	0.30348
O-Phospho-L-serine	184	CHA4	YLR098C	0	0	0.537829	0.021325	0.0423178
O-Phospho-L-serine	184	ACE2	YLR131C	0	0	0.523553	0.0257559	0.0494172
O-Phospho-L-serine	184	RFX1	YLR176C	0	0	0.586846	0.0104609	0.0240853
Hypoxanthine	135.03	RGT1	YKL038W	0	0	-0.306125	0.216657	0.291366
L-Citrulline	174.09	OPI1	YHL020C	0	0	-0.778235	0.000142706	0.000763895
L-Glutamine	145.06	SPT2	YER161C	0	0	-0.749146	0.000346091	0.00150266
L-Glutamine	145.06	RPH1	YER169W	0	0	-0.869404	2.80178e-06	3.47503e-05
Xanthine	151.03	UGA3	YDL170W	0	0	0.0040575	0.987251	0.988804
2-Oxoadipate	159.03	THI2	YBR240C	0	0	-0.015849	0.95023	0.960173
2-Oxoadipate	159.03	TEC1	YBR083W	0	0	0.230968	0.356465	0.428701
2-Oxoadipate	159.03	REB1	YBR049C	0	0	-0.293102	0.237841	0.313241
Xanthine	151.03	PHO2	YDL106C	0	0	-0.0838823	0.740707	0.779456
2-Oxoadipate	159.03	HAP3	YBL021C	0	0	0.157101	0.533574	0.598942
2-Oxoadipate	159.03	PDR3	YBL005W	0	0	0.273241	0.272605	0.350335
Xanthine	151.03	INO2	YDR123C	0	0	-0.254104	0.308915	0.386599
2-Oxoadipate	159.03	HAP2	YGL237C	0	0	-0.345034	0.160835	0.229199
Xanthine	151.03	SWI5	YDR146C	0	0	-0.095807	0.705308	0.750052
Xanthine	151.03	AFT2	YPL202C	0	0	-0.138303	0.584181	0.642033
Xanthine	151.03	MET31	YPL038W	0	0	0.0603645	0.811931	0.845099
Xanthine	151.03	HAP5	YOR358W	0	0	-0.300117	0.226272	0.301311
Xanthine	151.03	AZF1	YOR113W	0	0	-0.248569	0.319929	0.395668
Xanthine	151.03	CIN5	YOR028C	0	0	-0.274212	0.270836	0.349708
Xanthine	151.03	RPN4	YDL020C	0	0	-0.269717	0.279084	0.356265
2-Oxoadipate	159.03	MBP1	YDL056W	0	0	0.119271	0.637365	0.689306
Xanthine	151.03	RDS1	YCR106W	0	0	-0.14932	0.554279	0.616546
2-Oxoadipate	159.03	INO2	YDR123C	0	0	0.185932	0.460096	0.528392
Xanthine	151.03	TEC1	YBR083W	0	0	-0.210699	0.401342	0.473728
2-Oxoadipate	159.03	YAP6	YDR259C	0	0	0.038515	0.8794	0.900594
2-Oxoadipate	159.03	SUM1	YDR310C	0	0	0.0579427	0.819357	0.851436
2-Oxoadipate	159.03	CAD1	YDR423C	0	0	0.0358431	0.887715	0.906693
2-Oxoadipate	159.03	YHP1	YDR451C	0	0	0.0571461	0.821802	0.853049
2-Oxoadipate	159.03	STP1	YDR463W	0	0	0.205226	0.413961	0.485028
2-Oxoadipate	159.03	GLN3	YER040W	0	0	0.22966	0.359271	0.43099
2-Oxoadipate	159.03	SWI4	YER111C	0	0	0.0866835	0.732344	0.772619
2-Oxoadipate	159.03	SPT2	YER161C	0	0	0.278599	0.262933	0.341117
2-Oxoadipate	159.03	RPH1	YER169W	0	0	0.185932	0.460096	0.528392
Xanthine	151.03	PDR3	YBL005W	0	0	-0.34698	0.158331	0.226137
2-Oxoadipate	159.03	HSF1	YGL073W	0	0	-0.0610965	0.80969	0.843225
L-Glutamine	145.06	AFT2	YPL202C	0	0	-0.809626	4.68216e-05	0.000336241
Xanthine	151.03	INO4	YOL108C	0	0	-0.254104	0.308915	0.386599
Xanthine	151.03	MET32	YDR253C	0	0	0.127079	0.615323	0.670401
Xanthine	151.03	SUM1	YDR310C	0	0	-0.129502	0.608544	0.663771
Xanthine	151.03	CHA4	YLR098C	0	0	-0.0574402	0.820899	0.852575
Xanthine	151.03	RIM101	YHL027W	0	0	-0.234915	0.348073	0.420726
Xanthine	151.03	STE12	YHR084W	0	0	-0.245782	0.325561	0.400268
Xanthine	151.03	STB5	YHR178W	0	0	-0.312925	0.2061	0.278936
Xanthine	151.03	FKH1	YIL131C	0	0	-0.262169	0.293275	0.370667
Xanthine	151.03	ZAP1	YJL056C	0	0	-0.292816	0.23832	0.313577
Xanthine	151.03	SIP4	YJL089W	0	0	0.10001	0.692964	0.740634
Xanthine	151.03	PHO4	YFR034C	0	0	-0.0151822	0.952322	0.961377
Xanthine	151.03	SPT23	YKL020C	0	0	-0.15543	0.537992	0.602993
Xanthine	151.03	RGT1	YKL038W	0	0	-0.275144	0.269144	0.347994
Xanthine	151.03	RPH1	YER169W	0	0	-0.254104	0.308915	0.386599
Xanthine	151.03	MSN4	YKL062W	0	0	-0.294746	0.235096	0.310055
Xanthine	151.03	HAP4	YKL109W	0	0	-0.0883487	0.727386	0.767975
Xanthine	151.03	ASH1	YKL185W	0	0	-0.25257	0.311944	0.388102
Xanthine	151.03	SPT2	YER161C	0	0	-0.0233319	0.926782	0.940064
Xanthine	151.03	ACE2	YLR131C	0	0	-0.0612493	0.809223	0.843197
Xanthine	151.03	RAP1	YNL216W	0	0	0.40983	0.0912063	0.142282
Xanthine	151.03	RFX1	YLR176C	0	0	-0.348786	0.156031	0.223855
Xanthine	151.03	SWI4	YER111C	0	0	-0.200491	0.425047	0.496191
Xanthine	151.03	GLN3	YER040W	0	0	-0.26616	0.285718	0.36282
Xanthine	151.03	GCN4	YEL009C	0	0	-0.0539583	0.831604	0.860502
Xanthine	151.03	STP1	YDR463W	0	0	-0.210788	0.401138	0.473728
Xanthine	151.03	YOX1	YML027W	0	0	-0.0485688	0.848229	0.873881
Xanthine	151.03	SOK2	YMR016C	0	0	-0.254104	0.308915	0.386599
Xanthine	151.03	STB4	YMR019W	0	0	-0.434641	0.0714717	0.116339
Xanthine	151.03	MAC1	YMR021C	0	0	0.0482473	0.849223	0.873917
Xanthine	151.03	MSN2	YMR037C	0	0	-0.254104	0.308915	0.386599
Xanthine	151.03	YHP1	YDR451C	0	0	-0.0779539	0.758497	0.79686
Xanthine	151.03	MOT3	YMR070W	0	0	0.0699166	0.782799	0.819688
Xanthine	151.03	CRZ1	YNL027W	0	0	0.20455	0.415536	0.486276
Xanthine	151.03	FKH2	YNL068C	0	0	0.277287	0.265281	0.343464
2-Oxoadipate	159.03	SUT1	YGL162W	0	0	0.337379	0.170949	0.241273
2-Oxoadipate	159.03	OPI1	YHL020C	0	0	0.200299	0.4255	0.496416
L-Glutamine	145.06	PHO4	YFR034C	0	0	-0.700097	0.00121649	0.00410239
L-Glutamine	145.06	CBF1	YJR060W	0	0	0.722427	0.000708641	0.00260927
L-Citrulline	174.09	INO2	YDR123C	0	0	-0.73567	0.00050196	0.00198191
L-Citrulline	174.09	PHO2	YDL106C	0	0	-0.614187	0.0066934	0.0169788
L-Citrulline	174.09	MBP1	YDL056W	0	0	-0.712951	0.000896616	0.00315549
L-Citrulline	174.09	RPN4	YDL020C	0	0	-0.652179	0.00335474	0.00986292
L-Citrulline	174.09	RDS1	YCR106W	0	0	-0.62996	0.00507848	0.0138248
L-Citrulline	174.09	THI2	YBR240C	0	0	-0.388104	0.111498	0.168704
L-Glutamine	145.06	RGT1	YKL038W	0	0	-0.879766	1.49616e-06	2.34538e-05
L-Glutamine	145.06	MET31	YPL038W	0	0	0.765587	0.000212971	0.00104624
L-Glutamine	145.06	PHD1	YKL043W	0	0	0.577031	0.0121681	0.0270072
L-Glutamine	145.06	DAL80	YKR034W	0	0	-0.517804	0.0277309	0.052609
L-Glutamine	145.06	ACE2	YLR131C	0	0	-0.797131	7.46361e-05	0.000473853
L-Glutamine	145.06	YOX1	YML027W	0	0	-0.649988	0.00349976	0.0101334
2-Oxoadipate	159.03	AFT2	YPL202C	0	0	0.0773216	0.760401	0.798422
L-Glutamine	145.06	SOK2	YMR016C	0	0	-0.869404	2.80178e-06	3.47503e-05
L-Citrulline	174.09	SWI5	YDR146C	0	0	-0.474117	0.0468349	0.080632
L-Glutamine	145.06	GZF3	YJL110C	0	0	-0.330155	0.180879	0.251755
L-Glutamine	145.06	YAP5	YIR018W	0	0	0.517312	0.027905	0.0527985
L-Citrulline	174.09	MET32	YDR253C	0	0	0.62246	0.00580134	0.0152915
L-Citrulline	174.09	YAP6	YDR259C	0	0	0.651803	0.00337928	0.00988892
L-Citrulline	174.09	SUM1	YDR310C	0	0	-0.583602	0.0110024	0.0248237
L-Citrulline	174.09	CAD1	YDR423C	0	0	-0.210034	0.402863	0.474936
L-Citrulline	174.09	YHP1	YDR451C	0	0	-0.559477	0.015771	0.0329021
L-Citrulline	174.09	STP1	YDR463W	0	0	-0.716037	0.000831316	0.0029645
L-Citrulline	174.09	GCN4	YEL009C	0	0	-0.659729	0.00289233	0.00866815
L-Citrulline	174.09	GLN3	YER040W	0	0	-0.753753	0.000303187	0.00134742
L-Citrulline	174.09	SWI4	YER111C	0	0	-0.615858	0.00650478	0.0167954
L-Citrulline	174.09	SPT2	YER161C	0	0	-0.616522	0.0064311	0.0166303
L-Citrulline	174.09	RPH1	YER169W	0	0	-0.73567	0.00050196	0.00198191
L-Glutamine	145.06	STB5	YHR178W	0	0	-0.875724	1.92349e-06	2.76375e-05
L-Citrulline	174.09	PHO4	YFR034C	0	0	-0.458326	0.0557627	0.0940534
L-Glutamine	145.06	HSF1	YGL073W	0	0	0.867767	3.07885e-06	3.77159e-05
2-Oxoadipate	159.03	GCR1	YPL075W	0	0	-0.245489	0.326157	0.400268
2-Oxoadipate	159.03	MET31	YPL038W	0	0	-0.140622	0.577832	0.636448
2-Oxoadipate	159.03	HAP5	YOR358W	0	0	0.138035	0.584918	0.642033
2-Oxoadipate	159.03	CHA4	YLR098C	0	0	0.0863266	0.733408	0.772625
2-Oxoadipate	159.03	STE12	YHR084W	0	0	0.0735903	0.771666	0.808916
2-Oxoadipate	159.03	STB5	YHR178W	0	0	0.149345	0.554212	0.616546
2-Oxoadipate	159.03	XBP1	YIL101C	0	0	0.178877	0.477589	0.544365
2-Oxoadipate	159.03	FKH1	YIL131C	0	0	0.159735	0.526647	0.592362
2-Oxoadipate	159.03	ZAP1	YJL056C	0	0	0.248486	0.320096	0.395668
L-Glutamine	145.06	HAP5	YOR358W	0	0	-0.846087	9.65484e-06	9.53882e-05
L-Glutamine	145.06	TYE7	YOR344C	0	0	0.746212	0.000375992	0.00159671
2-Oxoadipate	159.03	SPT23	YKL020C	0	0	0.153206	0.543894	0.608537
2-Oxoadipate	159.03	RGT1	YKL038W	0	0	0.229868	0.358824	0.430724
2-Oxoadipate	159.03	MSN4	YKL062W	0	0	0.160208	0.525408	0.591664
L-Glutamine	145.06	INO4	YOL108C	0	0	-0.869404	2.80178e-06	3.47503e-05
L-Glutamine	145.06	YAP7	YOL028C	0	0	-0.666402	0.00252853	0.00776854
2-Oxoadipate	159.03	ASH1	YKL185W	0	0	0.299453	0.227352	0.302345
2-Oxoadipate	159.03	DAL80	YKR034W	0	0	-0.0944589	0.709282	0.753615
2-Oxoadipate	159.03	RFX1	YLR176C	0	0	0.254739	0.307666	0.386599
L-Glutamine	145.06	STB4	YMR019W	0	0	-0.76656	0.00020669	0.00102861
2-Oxoadipate	159.03	HAP1	YLR256W	0	0	-0.0215443	0.932379	0.944238
2-Oxoadipate	159.03	SFP1	YLR403W	0	0	-0.126919	0.615771	0.670506
2-Oxoadipate	159.03	SOK2	YMR016C	0	0	0.185932	0.460096	0.528392
2-Oxoadipate	159.03	STB4	YMR019W	0	0	0.132931	0.599003	0.654486
2-Oxoadipate	159.03	MAC1	YMR021C	0	0	0.147686	0.558671	0.618552
2-Oxoadipate	159.03	MSN2	YMR037C	0	0	0.185932	0.460096	0.528392
L-Glutamine	145.06	CRZ1	YNL027W	0	0	-0.487218	0.0402889	0.0714875
L-Glutamine	145.06	MSN2	YMR037C	0	0	-0.869404	2.80178e-06	3.47503e-05
2-Oxoadipate	159.03	FKH2	YNL068C	0	0	-0.157034	0.533751	0.598942
2-Oxoadipate	159.03	RAP1	YNL216W	0	0	-0.143643	0.569603	0.629197
2-Oxoadipate	159.03	DAL82	YNL314W	0	0	0.0973841	0.700667	0.746363
2-Oxoadipate	159.03	INO4	YOL108C	0	0	0.185932	0.460096	0.528392
2-Oxoadipate	159.03	CIN5	YOR028C	0	0	0.265467	0.287023	0.363727
2-Oxoadipate	159.03	AZF1	YOR113W	0	0	0.280141	0.26019	0.338799
But-1-ene-1,2,4-tricarboxylate	187.02	SWI5	YDR146C	0	0	-0.58743	0.0103657	0.0239238
But-1-ene-1,2,4-tricarboxylate	187.02	UME6	YDR207C	0	0	-0.736142	0.00049565	0.00197743
Hypoxanthine	135.03	HSF1	YGL073W	0	0	0.457519	0.0562508	0.0947931
Deoxycytidine	226.08	MSN4	YKL062W	0	0	-0.669626	0.00236673	0.00734225
Deoxycytidine	226.08	HAP1	YLR256W	0	0	0.691716	0.00147218	0.00489277
Ornithine	131.08	SWI4	YER111C	0	0	-0.62876	0.00518896	0.0140058
Deoxycytidine	226.08	ACE2	YLR131C	0	0	-0.447111	0.0628393	0.104787
Deoxycytidine	226.08	BAS1	YKR099W	0	0	0.678921	0.00194739	0.00620242
Deoxycytidine	226.08	DAL80	YKR034W	0	0	-0.125626	0.619401	0.673308
Deoxycytidine	226.08	ASH1	YKL185W	0	0	-0.606852	0.00757429	0.018725
Ornithine	131.08	SPT2	YER161C	0	0	-0.621989	0.00584937	0.0153757
Deoxycytidine	226.08	MET31	YPL038W	0	0	0.488279	0.0397907	0.0708008
Deoxycytidine	226.08	RGT1	YKL038W	0	0	-0.638591	0.00433914	0.0122098
Deoxycytidine	226.08	SPT23	YKL020C	0	0	-0.557949	0.0161208	0.0335221
Ornithine	131.08	RPH1	YER169W	0	0	-0.75545	0.000288557	0.00129749
Ornithine	131.08	PHO4	YFR034C	0	0	-0.471472	0.048249	0.0829171
Deoxycytidine	226.08	ZAP1	YJL056C	0	0	-0.646024	0.00377504	0.010832
Ornithine	131.08	HSF1	YGL073W	0	0	0.778941	0.000139443	0.00075489
Ornithine	131.08	GLN3	YER040W	0	0	-0.773748	0.000164956	0.000856604
Ornithine	131.08	STP1	YDR463W	0	0	-0.729396	0.000592476	0.00224647
Deoxycytidine	226.08	YOX1	YML027W	0	0	-0.422812	0.0804416	0.128317
Deoxycytidine	226.08	SOK2	YMR016C	0	0	-0.613982	0.00671687	0.0169788
Ornithine	131.08	YHP1	YDR451C	0	0	-0.567878	0.013954	0.0300294
Deoxycytidine	226.08	MAC1	YMR021C	0	0	-0.355122	0.148142	0.214574
Deoxycytidine	226.08	MSN2	YMR037C	0	0	-0.613982	0.00671687	0.0169788
Ornithine	131.08	SUM1	YDR310C	0	0	-0.579752	0.0116741	0.0260621
Ornithine	131.08	YAP6	YDR259C	0	0	0.729494	0.000590964	0.00224519
Deoxycytidine	226.08	CRZ1	YNL027W	0	0	-0.151351	0.548839	0.612995
Deoxycytidine	226.08	FKH2	YNL068C	0	0	0.613232	0.00680318	0.0171742
Deoxycytidine	226.08	RAP1	YNL216W	0	0	0.717091	0.000809943	0.0028992
Deoxycytidine	226.08	YAP7	YOL028C	0	0	-0.212445	0.397361	0.470773
Deoxycytidine	226.08	INO4	YOL108C	0	0	-0.613982	0.00671687	0.0169788
Deoxycytidine	226.08	CIN5	YOR028C	0	0	-0.659702	0.00289392	0.00866815
Deoxycytidine	226.08	AZF1	YOR113W	0	0	-0.629542	0.00511669	0.0138892
Deoxycytidine	226.08	TYE7	YOR344C	0	0	0.556068	0.0165599	0.0343022
Deoxycytidine	226.08	FKH1	YIL131C	0	0	-0.556034	0.0165677	0.0343022
Deoxycytidine	226.08	XBP1	YIL101C	0	0	-0.51034	0.030468	0.0570827
Deoxycytidine	226.08	STB5	YHR178W	0	0	-0.649406	0.0035391	0.0102318
Deoxycytidine	226.08	CAD1	YDR423C	0	0	-0.0563658	0.824199	0.853913
Deoxycytidine	226.08	TEC1	YBR083W	0	0	-0.51775	0.0277498	0.052609
Ornithine	131.08	GZF3	YJL110C	0	0	-0.290846	0.241639	0.317152
Deoxycytidine	226.08	THI2	YBR240C	0	0	-0.361025	0.141043	0.206539
Ornithine	131.08	SIP4	YJL089W	0	0	0.654324	0.00321763	0.0094744
Deoxycytidine	226.08	MBP1	YDL056W	0	0	-0.628055	0.00525472	0.0141234
Deoxycytidine	226.08	PHO2	YDL106C	0	0	-0.479365	0.0441222	0.0772257
Deoxycytidine	226.08	UGA3	YDL170W	0	0	-0.386276	0.113341	0.171356
Deoxycytidine	226.08	NRG1	YDR043C	0	0	-0.496248	0.0362012	0.0658022
Deoxycytidine	226.08	INO2	YDR123C	0	0	-0.613982	0.00671687	0.0169788
Deoxycytidine	226.08	SWI5	YDR146C	0	0	-0.425939	0.0779943	0.125145
Deoxycytidine	226.08	UME6	YDR207C	0	0	-0.682452	0.00180511	0.00581713
Deoxycytidine	226.08	MET32	YDR253C	0	0	0.533616	0.0225652	0.0444099
Ornithine	131.08	ZAP1	YJL056C	0	0	-0.808905	4.81408e-05	0.000343272
Deoxycytidine	226.08	SUM1	YDR310C	0	0	-0.493547	0.0373889	0.0675333
Deoxycytidine	226.08	YHP1	YDR451C	0	0	-0.478365	0.0446297	0.077888
Deoxycytidine	226.08	STE12	YHR084W	0	0	-0.5932	0.00946209	0.0223511
Deoxycytidine	226.08	STP1	YDR463W	0	0	-0.612102	0.00693486	0.0174289
Deoxycytidine	226.08	GLN3	YER040W	0	0	-0.628473	0.00521562	0.0140579
Deoxycytidine	226.08	SWI4	YER111C	0	0	-0.532316	0.0229591	0.0449537
Deoxycytidine	226.08	SPT2	YER161C	0	0	-0.410578	0.0905594	0.14162
Deoxycytidine	226.08	RPH1	YER169W	0	0	-0.613982	0.00671687	0.0169788
Ornithine	131.08	FKH1	YIL131C	0	0	-0.754726	0.000294728	0.00131903
Deoxycytidine	226.08	PHO4	YFR034C	0	0	-0.392762	0.106899	0.163036
Ornithine	131.08	STB5	YHR178W	0	0	-0.777142	0.000147873	0.000784957
Ornithine	131.08	STE12	YHR084W	0	0	-0.735292	0.000507062	0.00199793
Ornithine	131.08	RIM101	YHL027W	0	0	-0.474164	0.0468101	0.080632
Deoxycytidine	226.08	SUT1	YGL162W	0	0	-0.592828	0.00951835	0.0224563
Ornithine	131.08	YAP3	YHL009C	0	0	0.618782	0.00618519	0.0161034
Deoxycytidine	226.08	OPI1	YHL020C	0	0	-0.635129	0.00462428	0.0128258
Deoxycytidine	226.08	RIM101	YHL027W	0	0	-0.458589	0.0556042	0.0938689
Deoxycytidine	226.08	HAP5	YOR358W	0	0	-0.657616	0.00301611	0.00899186
Ornithine	131.08	MET32	YDR253C	0	0	0.637369	0.00443809	0.0123994
Ornithine	131.08	RGT1	YKL038W	0	0	-0.780081	0.000134316	0.000739706
Inosine	267.07	RGT1	YKL038W	0	0	-0.166009	0.510317	0.577008
Inosine	267.07	RFX1	YLR176C	0	0	-0.237653	0.34232	0.416132
Inosine	267.07	ACE2	YLR131C	0	0	-0.0485876	0.848171	0.873881
gamma-Amino-gamma-cyanobutanoate	127.05	RGT1	YKL038W	0	0	-0.89138	6.89447e-07	1.53202e-05
gamma-Amino-gamma-cyanobutanoate	127.05	DAL80	YKR034W	0	0	-0.503286	0.0332423	0.0613701
Inosine	267.07	MSN4	YKL062W	0	0	-0.0237429	0.925496	0.939456
gamma-Amino-gamma-cyanobutanoate	127.05	ACE2	YLR131C	0	0	-0.805875	5.40418e-05	0.000374181
Inosine	267.07	SPT23	YKL020C	0	0	-0.00221102	0.993053	0.994093
Ornithine	131.08	SWI5	YDR146C	0	0	-0.48088	0.0433618	0.0762322
gamma-Amino-gamma-cyanobutanoate	127.05	YOX1	YML027W	0	0	-0.659372	0.00291297	0.00871155
Inosine	267.07	GZF3	YJL110C	0	0	-0.0523007	0.83671	0.864766
Inosine	267.07	ZAP1	YJL056C	0	0	-0.226204	0.366748	0.438582
gamma-Amino-gamma-cyanobutanoate	127.05	STB4	YMR019W	0	0	-0.788083	0.000102614	0.000608991
Inosine	267.07	FKH1	YIL131C	0	0	-0.194863	0.438426	0.510067
gamma-Amino-gamma-cyanobutanoate	127.05	CRZ1	YNL027W	0	0	-0.476391	0.0456445	0.0791531
gamma-Amino-gamma-cyanobutanoate	127.05	GZF3	YJL110C	0	0	-0.338565	0.169354	0.239199
Inosine	267.07	SFP1	YLR403W	0	0	0.254373	0.308386	0.386599
gamma-Amino-gamma-cyanobutanoate	127.05	YAP5	YIR018W	0	0	0.544792	0.0193931	0.0391758
Inosine	267.07	SOK2	YMR016C	0	0	-0.148174	0.557357	0.617672
Inosine	267.07	STB4	YMR019W	0	0	-0.406274	0.0943286	0.14627
Inosine	267.07	MSN2	YMR037C	0	0	-0.148174	0.557357	0.617672
gamma-Amino-gamma-cyanobutanoate	127.05	PHO4	YFR034C	0	0	-0.701303	0.00118293	0.00400102
gamma-Amino-gamma-cyanobutanoate	127.05	SPT2	YER161C	0	0	-0.760071	0.000251699	0.00117603
gamma-Amino-gamma-cyanobutanoate	127.05	SWI4	YER111C	0	0	-0.811895	4.28646e-05	0.000316272
Inosine	267.07	FKH2	YNL068C	0	0	0.130066	0.606972	0.662435
gamma-Amino-gamma-cyanobutanoate	127.05	GLN3	YER040W	0	0	-0.882954	1.21938e-06	2.28454e-05
Inosine	267.07	RAP1	YNL216W	0	0	0.209835	0.403321	0.475183
gamma-Amino-gamma-cyanobutanoate	127.05	GCN4	YEL009C	0	0	-0.792377	8.83931e-05	0.000550226
gamma-Amino-gamma-cyanobutanoate	127.05	STP1	YDR463W	0	0	-0.870338	2.65351e-06	3.44956e-05
Inosine	267.07	INO4	YOL108C	0	0	-0.148174	0.557357	0.617672
Inosine	267.07	CIN5	YOR028C	0	0	-0.117096	0.643559	0.695219
Inosine	267.07	TYE7	YOR344C	0	0	0.120766	0.633122	0.685494
Inosine	267.07	STB5	YHR178W	0	0	-0.183159	0.466933	0.534958
Inosine	267.07	STE12	YHR084W	0	0	-0.0140337	0.955925	0.96273
Inosine	267.07	RIM101	YHL027W	0	0	-0.0634549	0.802479	0.837998
Xanthine	151.03	OPI1	YHL020C	0	0	-0.331771	0.178624	0.249708
Deoxycytidine	226.08	AFT2	YPL202C	0	0	-0.525549	0.0250966	0.048493
Ornithine	131.08	PHO2	YDL106C	0	0	-0.609877	0.00720036	0.0179399
Inosine	267.07	PDR3	YBL005W	0	0	-0.0929879	0.713628	0.757635
Inosine	267.07	HAP3	YBL021C	0	0	-0.361433	0.140561	0.205991
Ornithine	131.08	RPN4	YDL020C	0	0	-0.710962	0.000940924	0.00330534
Inosine	267.07	TEC1	YBR083W	0	0	-0.186665	0.458296	0.527911
Ornithine	131.08	THI2	YBR240C	0	0	-0.395463	0.104296	0.159448
Inosine	267.07	RDS1	YCR106W	0	0	0.11331	0.654394	0.70493
Inosine	267.07	MBP1	YDL056W	0	0	-0.056355	0.824232	0.853913
Inosine	267.07	PHO2	YDL106C	0	0	0.111644	0.659181	0.708889
Inosine	267.07	UGA3	YDL170W	0	0	0.0964923	0.70329	0.748679
gamma-Amino-gamma-cyanobutanoate	127.05	AFT2	YPL202C	0	0	-0.814245	3.90721e-05	0.000292811
Inosine	267.07	INO2	YDR123C	0	0	-0.148174	0.557357	0.617672
Inosine	267.07	UME6	YDR207C	0	0	-0.303317	0.221117	0.296322
Inosine	267.07	YAP6	YDR259C	0	0	0.356887	0.145995	0.212164
Inosine	267.07	OPI1	YHL020C	0	0	-0.237552	0.34253	0.416132
Inosine	267.07	SUM1	YDR310C	0	0	0.0631761	0.803331	0.83843
gamma-Amino-gamma-cyanobutanoate	127.05	MET31	YPL038W	0	0	0.770272	0.000184146	0.000928503
Inosine	267.07	YHP1	YDR451C	0	0	0.0889428	0.725619	0.766533
Inosine	267.07	STP1	YDR463W	0	0	-0.109451	0.665505	0.714885
Inosine	267.07	GCN4	YEL009C	0	0	-0.0406054	0.872904	0.894913
Inosine	267.07	GLN3	YER040W	0	0	-0.174393	0.488872	0.555431
Inosine	267.07	SWI4	YER111C	0	0	-0.048395	0.848766	0.873917
Inosine	267.07	SPT2	YER161C	0	0	-0.0674453	0.790312	0.827101
Inosine	267.07	RPH1	YER169W	0	0	-0.148174	0.557357	0.617672
Inosine	267.07	PHO4	YFR034C	0	0	0.10088	0.690417	0.738738
gamma-Amino-gamma-cyanobutanoate	127.05	TYE7	YOR344C	0	0	0.753316	0.000307061	0.00136147
Inosine	267.07	HSF1	YGL073W	0	0	0.220642	0.378959	0.451209
Inosine	267.07	SUT1	YGL162W	0	0	-0.0895398	0.723846	0.7652
gamma-Amino-gamma-cyanobutanoate	127.05	YAP7	YOL028C	0	0	-0.655433	0.00314856	0.00932851
Ornithine	131.08	SPT23	YKL020C	0	0	-0.700072	0.00121719	0.00410239
Dethiobiotin	213.12	ROX1	YPR065W	0	0	-0.565364	0.0144793	0.0309507
But-1-ene-1,2,4-tricarboxylate	187.02	MET32	YDR253C	0	0	0.618172	0.00625085	0.0162147
But-1-ene-1,2,4-tricarboxylate	187.02	SOK2	YMR016C	0	0	-0.731674	0.000558153	0.00214183
But-1-ene-1,2,4-tricarboxylate	187.02	RAP1	YNL216W	0	0	0.766043	0.000210003	0.00103699
But-1-ene-1,2,4-tricarboxylate	187.02	FKH2	YNL068C	0	0	0.754974	0.000292598	0.00131257
But-1-ene-1,2,4-tricarboxylate	187.02	CRZ1	YNL027W	0	0	-0.325048	0.188127	0.257899
Hypoxanthine	135.03	INO2	YDR123C	0	0	-0.273573	0.272	0.350028
But-1-ene-1,2,4-tricarboxylate	187.02	MSN2	YMR037C	0	0	-0.731674	0.000558153	0.00214183
But-1-ene-1,2,4-tricarboxylate	187.02	STB4	YMR019W	0	0	-0.6803	0.00189076	0.0060625
But-1-ene-1,2,4-tricarboxylate	187.02	YOX1	YML027W	0	0	-0.497013	0.0358699	0.0655955
Dethiobiotin	213.12	MBP1	YDL056W	0	0	-0.451804	0.0598012	0.0999826
Hypoxanthine	135.03	SWI5	YDR146C	0	0	0.0118563	0.962759	0.967823
But-1-ene-1,2,4-tricarboxylate	187.02	SFP1	YLR403W	0	0	0.786379	0.000108771	0.000631796
But-1-ene-1,2,4-tricarboxylate	187.02	HAP1	YLR256W	0	0	0.744621	0.00039309	0.0016526
But-1-ene-1,2,4-tricarboxylate	187.02	RFX1	YLR176C	0	0	-0.804055	5.78734e-05	0.000390798
But-1-ene-1,2,4-tricarboxylate	187.02	ACE2	YLR131C	0	0	-0.639694	0.00425133	0.0120004
But-1-ene-1,2,4-tricarboxylate	187.02	CHA4	YLR098C	0	0	-0.684287	0.00173465	0.00565685
But-1-ene-1,2,4-tricarboxylate	187.02	YAP7	YOL028C	0	0	-0.517475	0.0278471	0.0527412
But-1-ene-1,2,4-tricarboxylate	187.02	INO4	YOL108C	0	0	-0.731674	0.000558153	0.00214183
But-1-ene-1,2,4-tricarboxylate	187.02	CIN5	YOR028C	0	0	-0.797968	7.24151e-05	0.00046438
But-1-ene-1,2,4-tricarboxylate	187.02	AZF1	YOR113W	0	0	-0.722125	0.000714082	0.00261921
But-1-ene-1,2,4-tricarboxylate	187.02	TYE7	YOR344C	0	0	0.624543	0.00559267	0.0148852
But-1-ene-1,2,4-tricarboxylate	187.02	HAP5	YOR358W	0	0	-0.721707	0.000721665	0.00262686
But-1-ene-1,2,4-tricarboxylate	187.02	MET31	YPL038W	0	0	0.634963	0.00463838	0.0128463
Hypoxanthine	135.03	PHO2	YDL106C	0	0	-0.0963786	0.703625	0.748679
Hypoxanthine	135.03	MBP1	YDL056W	0	0	-0.27226	0.274399	0.352241
But-1-ene-1,2,4-tricarboxylate	187.02	AFT2	YPL202C	0	0	-0.684078	0.00174256	0.00567297
But-1-ene-1,2,4-tricarboxylate	187.02	ARR1	YPR199C	0	0	0.347743	0.157356	0.225249
Hypoxanthine	135.03	RPN4	YDL020C	0	0	-0.278637	0.262866	0.341117
Dethiobiotin	213.12	HAP3	YBL021C	0	0	-0.55291	0.017318	0.0356147
Dethiobiotin	213.12	REB1	YBR049C	0	0	0.231537	0.355249	0.427507
Dethiobiotin	213.12	TEC1	YBR083W	0	0	-0.466272	0.0511235	0.087074
Hypoxanthine	135.03	TEC1	YBR083W	0	0	-0.286835	0.248489	0.324803
Dethiobiotin	213.12	THI2	YBR240C	0	0	-0.410121	0.0909543	0.142005
But-1-ene-1,2,4-tricarboxylate	187.02	BAS1	YKR099W	0	0	0.756466	0.000280084	0.00128355
But-1-ene-1,2,4-tricarboxylate	187.02	ASH1	YKL185W	0	0	-0.76031	0.000249901	0.00117337
Hypoxanthine	135.03	MET32	YDR253C	0	0	0.12296	0.626914	0.679928
But-1-ene-1,2,4-tricarboxylate	187.02	HAP2	YGL237C	0	0	0.752699	0.000312588	0.00137957
But-1-ene-1,2,4-tricarboxylate	187.02	YAP6	YDR259C	0	0	0.715794	0.000836315	0.00297616
But-1-ene-1,2,4-tricarboxylate	187.02	SUM1	YDR310C	0	0	-0.651834	0.00337725	0.00988892
But-1-ene-1,2,4-tricarboxylate	187.02	CAD1	YDR423C	0	0	-0.322564	0.191722	0.262262
But-1-ene-1,2,4-tricarboxylate	187.02	YHP1	YDR451C	0	0	-0.610549	0.0071193	0.0178076
But-1-ene-1,2,4-tricarboxylate	187.02	STP1	YDR463W	0	0	-0.735002	0.000511006	0.00200933
But-1-ene-1,2,4-tricarboxylate	187.02	GCN4	YEL009C	0	0	-0.683164	0.00177751	0.00575733
But-1-ene-1,2,4-tricarboxylate	187.02	GLN3	YER040W	0	0	-0.7429	0.000412324	0.00171667
But-1-ene-1,2,4-tricarboxylate	187.02	SWI4	YER111C	0	0	-0.651589	0.00339327	0.00989107
But-1-ene-1,2,4-tricarboxylate	187.02	SPT2	YER161C	0	0	-0.606198	0.00765717	0.0188811
But-1-ene-1,2,4-tricarboxylate	187.02	RPH1	YER169W	0	0	-0.731674	0.000558153	0.00214183
But-1-ene-1,2,4-tricarboxylate	187.02	PHO4	YFR034C	0	0	-0.532974	0.0227589	0.0446991
Hypoxanthine	135.03	PHO4	YFR034C	0	0	0.0417145	0.86946	0.89234
Hypoxanthine	135.03	RPH1	YER169W	0	0	-0.273573	0.272	0.350028
But-1-ene-1,2,4-tricarboxylate	187.02	SUT1	YGL162W	0	0	-0.719372	0.000765251	0.00277303
But-1-ene-1,2,4-tricarboxylate	187.02	YAP3	YHL009C	0	0	0.503218	0.0332702	0.0613701
Hypoxanthine	135.03	YAP6	YDR259C	0	0	0.565458	0.0144594	0.0309429
But-1-ene-1,2,4-tricarboxylate	187.02	OPI1	YHL020C	0	0	-0.747751	0.00036005	0.00154273
But-1-ene-1,2,4-tricarboxylate	187.02	RIM101	YHL027W	0	0	-0.462793	0.053117	0.0900679
But-1-ene-1,2,4-tricarboxylate	187.02	STE12	YHR084W	0	0	-0.809666	4.67485e-05	0.000336241
But-1-ene-1,2,4-tricarboxylate	187.02	STB5	YHR178W	0	0	-0.754584	0.000295948	0.00132139
Hypoxanthine	135.03	SWI4	YER111C	0	0	-0.193724	0.441161	0.512186
But-1-ene-1,2,4-tricarboxylate	187.02	XBP1	YIL101C	0	0	-0.727945	0.000615253	0.00231903
Hypoxanthine	135.03	GLN3	YER040W	0	0	-0.297341	0.230805	0.305537
Hypoxanthine	135.03	GCN4	YEL009C	0	0	-0.112283	0.657343	0.70731
But-1-ene-1,2,4-tricarboxylate	187.02	ZAP1	YJL056C	0	0	-0.756367	0.000280905	0.00128423
But-1-ene-1,2,4-tricarboxylate	187.02	SIP4	YJL089W	0	0	0.608635	0.00735205	0.0182702
Hypoxanthine	135.03	STP1	YDR463W	0	0	-0.236009	0.345768	0.419
Hypoxanthine	135.03	YHP1	YDR451C	0	0	-0.027437	0.913942	0.930497
But-1-ene-1,2,4-tricarboxylate	187.02	RGT1	YKL038W	0	0	-0.74916	0.000345958	0.00150266
Hypoxanthine	135.03	SUM1	YDR310C	0	0	-0.091226	0.718843	0.761109
Dethiobiotin	213.12	RDS1	YCR106W	0	0	-0.343659	0.162621	0.231054
Dethiobiotin	213.12	PHO2	YDL106C	0	0	-0.375421	0.12473	0.185782
Dethiobiotin	213.12	AFT2	YPL202C	0	0	-0.469526	0.04931	0.0845883
Dethiobiotin	213.12	RFX1	YLR176C	0	0	-0.445347	0.0640109	0.106093
Dethiobiotin	213.12	YOX1	YML027W	0	0	-0.43894	0.0684027	0.11182
Ornithine	131.08	YOX1	YML027W	0	0	-0.525016	0.0252715	0.0487816
Ornithine	131.08	SOK2	YMR016C	0	0	-0.75545	0.000288557	0.00129749
Dethiobiotin	213.12	SFP1	YLR403W	0	0	0.503307	0.0332337	0.0613701
Dethiobiotin	213.12	HAP1	YLR256W	0	0	0.533346	0.0226463	0.0445238
Ornithine	131.08	MAC1	YMR021C	0	0	-0.540956	0.0204395	0.0409863
Dethiobiotin	213.12	ACE2	YLR131C	0	0	-0.430993	0.0741553	0.119992
Dethiobiotin	213.12	NRG1	YDR043C	0	0	-0.368201	0.132736	0.19633
Dethiobiotin	213.12	CHA4	YLR098C	0	0	-0.407076	0.093618	0.145569
Dethiobiotin	213.12	DAL80	YKR034W	0	0	-0.179164	0.47687	0.544058
Dethiobiotin	213.12	ASH1	YKL185W	0	0	-0.539023	0.0209833	0.0416831
Ornithine	131.08	MSN2	YMR037C	0	0	-0.75545	0.000288557	0.00129749
Dethiobiotin	213.12	MSN4	YKL062W	0	0	-0.424503	0.0791112	0.126618
Dethiobiotin	213.12	RGT1	YKL038W	0	0	-0.523947	0.0256247	0.0492149
Dethiobiotin	213.12	SOK2	YMR016C	0	0	-0.488322	0.039771	0.0708008
Dethiobiotin	213.12	MAC1	YMR021C	0	0	-0.29322	0.237644	0.313198
Dethiobiotin	213.12	MSN2	YMR037C	0	0	-0.488322	0.039771	0.0708008
Ornithine	131.08	SFP1	YLR403W	0	0	0.810665	4.49726e-05	0.000330548
Ornithine	131.08	HAP1	YLR256W	0	0	0.72959	0.000589481	0.00224447
Dethiobiotin	213.12	CRZ1	YNL027W	0	0	-0.245404	0.32633	0.400268
Dethiobiotin	213.12	FKH2	YNL068C	0	0	0.480561	0.0435212	0.0764421
Ornithine	131.08	RFX1	YLR176C	0	0	-0.821925	2.86003e-05	0.000224919
Dethiobiotin	213.12	RAP1	YNL216W	0	0	0.50346	0.0331719	0.0613701
Dethiobiotin	213.12	YAP7	YOL028C	0	0	-0.17366	0.49073	0.55721
Dethiobiotin	213.12	INO4	YOL108C	0	0	-0.488322	0.039771	0.0708008
Dethiobiotin	213.12	CIN5	YOR028C	0	0	-0.485588	0.0410628	0.0727258
Ornithine	131.08	ACE2	YLR131C	0	0	-0.649288	0.00354714	0.0102342
Dethiobiotin	213.12	TYE7	YOR344C	0	0	0.432766	0.0728418	0.118267
Dethiobiotin	213.12	HAP5	YOR358W	0	0	-0.527663	0.0244128	0.0474114
Dethiobiotin	213.12	MET31	YPL038W	0	0	0.44295	0.0656287	0.108398
Ornithine	131.08	CHA4	YLR098C	0	0	-0.582188	0.0112453	0.0252228
Dethiobiotin	213.12	SPT23	YKL020C	0	0	-0.418337	0.084041	0.13262
Ornithine	131.08	FKH2	YNL068C	0	0	0.760221	0.000250572	0.00117363
Dethiobiotin	213.12	GZF3	YJL110C	0	0	-0.314129	0.204267	0.277034
Dethiobiotin	213.12	RPH1	YER169W	0	0	-0.488322	0.039771	0.0708008
Dethiobiotin	213.12	INO2	YDR123C	0	0	-0.488322	0.039771	0.0708008
Dethiobiotin	213.12	SWI5	YDR146C	0	0	-0.312403	0.206898	0.279709
Dethiobiotin	213.12	UME6	YDR207C	0	0	-0.499746	0.0347062	0.0637726
Hypoxanthine	135.03	HAP3	YBL021C	0	0	-0.392109	0.107535	0.163615
Hypoxanthine	135.03	PDR3	YBL005W	0	0	-0.45126	0.0601473	0.100473
Dethiobiotin	213.12	YAP6	YDR259C	0	0	0.53645	0.0217248	0.0429774
Dethiobiotin	213.12	SUM1	YDR310C	0	0	-0.348029	0.156992	0.224897
Dethiobiotin	213.12	CAD1	YDR423C	0	0	-0.200591	0.424811	0.496191
Dethiobiotin	213.12	YHP1	YDR451C	0	0	-0.411252	0.0899789	0.140942
Dethiobiotin	213.12	STP1	YDR463W	0	0	-0.512445	0.0296756	0.0557985
Dethiobiotin	213.12	GCN4	YEL009C	0	0	-0.53927	0.0209133	0.0416641
Dethiobiotin	213.12	GLN3	YER040W	0	0	-0.511045	0.0302005	0.0566928
Dethiobiotin	213.12	SWI4	YER111C	0	0	-0.360928	0.141159	0.20655
Ornithine	131.08	AFT2	YPL202C	0	0	-0.604865	0.0078284	0.0192214
Dethiobiotin	213.12	GAT1	YFL021W	0	0	-0.191853	0.445668	0.516396
Dethiobiotin	213.12	SIP4	YJL089W	0	0	0.396736	0.103084	0.158045
Dethiobiotin	213.12	PHO4	YFR034C	0	0	-0.424995	0.0787272	0.126109
Ornithine	131.08	GCR1	YPL075W	0	0	0.802594	6.11158e-05	0.000408365
Dethiobiotin	213.12	HSF1	YGL073W	0	0	0.51689	0.0280554	0.0530306
Ornithine	131.08	HAP5	YOR358W	0	0	-0.737313	0.000480284	0.0019282
Dethiobiotin	213.12	SUT1	YGL162W	0	0	-0.469035	0.0495804	0.0849759
Ornithine	131.08	AZF1	YOR113W	0	0	-0.752287	0.000316327	0.00139286
Ornithine	131.08	CIN5	YOR028C	0	0	-0.804372	5.71905e-05	0.000387557
Dethiobiotin	213.12	RIM101	YHL027W	0	0	-0.313678	0.204952	0.277578
Dethiobiotin	213.12	STE12	YHR084W	0	0	-0.353265	0.150425	0.217117
Dethiobiotin	213.12	STB5	YHR178W	0	0	-0.508929	0.031008	0.0579807
Ornithine	131.08	INO4	YOL108C	0	0	-0.75545	0.000288557	0.00129749
Dethiobiotin	213.12	XBP1	YIL101C	0	0	-0.475587	0.0460626	0.0796612
Dethiobiotin	213.12	FKH1	YIL131C	0	0	-0.445992	0.0635806	0.105746
Dethiobiotin	213.12	ZAP1	YJL056C	0	0	-0.540859	0.0204666	0.0409976
Inosine	267.07	MET32	YDR253C	0	0	0.0996707	0.693957	0.741281

## Sheet: Metabolites and kinasesphosphat
Metabolites	ion	Kinases/Phosphatases	feature	coef	coef (abs)	cor	pval	fdr
dUDP	387	RIM15	YFL033C	-0.566102	0.566102	-0.596615	0.000805007	0.00724506
gamma-Amino-gamma-cyanobutanoate	127.05	RIM15	YFL033C	-0.531697	0.531697	-0.560673	0.00191289	0.0135641
dUDP	387	TPK1	YJL164C	0.432412	0.432412	0.587103	0.00102218	0.00824791
gamma-Amino-gamma-cyanobutanoate	127.05	CDC5	YMR001C	0.394089	0.394089	0.25978	0.181873	0.405316
dUDP	387	CDC5	YMR001C	0.382281	0.382281	0.217325	0.266615	0.500655
L-Proline	114.06	CDC5	YMR001C	-0.372311	0.372311	-0.318162	0.0989442	0.26922
IMP	347.04	RIM15	YFL033C	-0.357891	0.357891	-0.695056	4.0475e-05	0.00139665
dUDP	387	TOR1	YJR066W	-0.350002	0.350002	-0.105153	0.594361	0.72817
gamma-Amino-gamma-cyanobutanoate	127.05	TPK1	YJL164C	0.331146	0.331146	0.499606	0.0067913	0.0311601
gamma-Amino-gamma-cyanobutanoate	127.05	YAK1	YJL141C	-0.309102	0.309102	-0.553069	0.00226932	0.0149172
L-Proline	114.06	RIM15	YFL033C	0.308799	0.308799	0.484985	0.00890261	0.0372002
dUDP	387	YAK1	YJL141C	-0.288709	0.288709	-0.548697	0.0024991	0.0156131
L-Proline	114.06	TPK1	YJL164C	-0.265888	0.265888	-0.583533	0.00111592	0.00870421
L-Citrulline	174.09	YAK1	YJL141C	-0.250003	0.250003	-0.637853	0.000260771	0.00456033
IMP	347.04	YAK1	YJL141C	-0.22676	0.22676	-0.641888	0.000231503	0.0045143
UDP-N-acetyl-D-galactosamine	606.07	CBK1	YNL161W	-0.223753	0.223753	-0.6841	5.9686e-05	0.00139665
gamma-Amino-gamma-cyanobutanoate	127.05	CKA2	YOR061W	-0.223569	0.223569	-0.61802	0.000457309	0.00473161
L-Proline	114.06	TOR1	YJR066W	0.221369	0.221369	0.120716	0.54061	0.683461
gamma-Amino-gamma-cyanobutanoate	127.05	TOR1	YJR066W	-0.21686	0.21686	-0.0428518	0.828589	0.901813
gamma-Amino-gamma-cyanobutanoate	127.05	CKA1	YIL035C	-0.208076	0.208076	-0.618353	0.000453154	0.00473161
gamma-Amino-gamma-cyanobutanoate	127.05	CKB1	YGL019W	-0.198927	0.198927	-0.636241	0.000273352	0.00456033
gamma-Amino-gamma-cyanobutanoate	127.05	CKB2	YOR039W	-0.193738	0.193738	-0.633928	0.000292329	0.00456033
Glycerol 3-phosphate	171.01	TPK1	YJL164C	-0.188527	0.188527	-0.678142	7.32245e-05	0.00155769
L-Histidine	154.06	YAK1	YJL141C	-0.177438	0.177438	-0.631643	0.000312208	0.00456604
dUDP	387	CKA2	YOR061W	-0.174564	0.174564	-0.590046	0.0009501	0.00794012
dUDP	387	CKA1	YIL035C	-0.166826	0.166826	-0.590607	0.000936875	0.00794012
L-Proline	114.06	YAK1	YJL141C	0.16215	0.16215	0.579282	0.00123724	0.00933913
dUDP	387	CKB2	YOR039W	-0.154063	0.154063	-0.620684	0.000425006	0.00473161
dUDP	387	CKB1	YGL019W	-0.149995	0.149995	-0.623279	0.000395488	0.00473161
L-Proline	114.06	MPS1	YDL028C	0.139142	0.139142	-0.0371716	0.851041	0.914009
gamma-Amino-gamma-cyanobutanoate	127.05	CBK1	YNL161W	-0.13715	0.13715	0.138839	0.481062	0.646905
L-Proline	114.06	CKB2	YOR039W	0.130794	0.130794	0.539443	0.00305223	0.0162323
N-Acetyl-L-glutamyl 5-phosphate	268.02	RIM15	YFL033C	-0.121959	0.121959	-0.548037	0.00253546	0.0156131
Xanthine	151.03	YAK1	YJL141C	-0.117766	0.117766	-0.540637	0.00297541	0.0161918
L-Asparagine	131.05	CAK1	YFL029C	-0.113233	0.113233	-0.261041	0.179686	0.404827
L-Proline	114.06	CLN2	YPL256C	0.110767	0.110767	0.00825014	0.966765	0.97932
L-Proline	114.06	CKB1	YGL019W	0.1084	0.1084	0.541688	0.00290923	0.0161918
IMP	347.04	CKB1	YGL019W	-0.103059	0.103059	-0.717542	1.72589e-05	0.00122788
L-Citrulline	174.09	TOR1	YJR066W	-0.102783	0.102783	-0.158111	0.421644	0.594366
L-Asparagine	131.05	YAK1	YJL141C	-0.100443	0.100443	-0.491701	0.00787308	0.0334964
L-Proline	114.06	CBK1	YNL161W	0.098482	0.098482	-0.19992	0.307734	0.52797
IMP	347.04	TOR1	YJR066W	-0.0978857	0.0978857	-0.0247145	0.900656	0.940864
dUDP	387	CDC28	YBR160W	-0.0974367	0.0974367	-0.0183935	0.925983	0.955201
UDP-N-acetyl-D-galactosamine	606.07	PRK1	YIL095W	-0.0942523	0.0942523	-0.53032	0.00369702	0.0192245
L-Citrulline	174.09	RIM15	YFL033C	-0.0937792	0.0937792	-0.361838	0.0584838	0.171065
L-Asparagine	131.05	CDC5	YMR001C	0.0849816	0.0849816	0.390712	0.0398097	0.124206
Glycerol 3-phosphate	171.01	PRK1	YIL095W	-0.0845115	0.0845115	-0.627192	0.000354368	0.00473161
gamma-Amino-gamma-cyanobutanoate	127.05	CAK1	YFL029C	-0.081122	0.081122	0.0364372	0.853952	0.914009
IMP	347.04	CDC5	YMR001C	0.0808725	0.0808725	0.107658	0.585556	0.724975
UDP-N-acetyl-D-galactosamine	606.07	CAK1	YFL029C	-0.0801652	0.0801652	-0.176701	0.36839	0.577377
IMP	347.04	CKB2	YOR039W	-0.0799453	0.0799453	-0.71436	1.95652e-05	0.00122788
N-Acetyl-L-glutamyl 5-phosphate	268.02	CKB2	YOR039W	-0.0797359	0.0797359	-0.712559	2.09895e-05	0.00122788
UDP-N-acetyl-D-galactosamine	606.07	CLN2	YPL256C	0.0796999	0.0796999	0.568126	0.00161147	0.0117839
L-Citrulline	174.09	CKA2	YOR061W	-0.0792142	0.0792142	-0.611707	0.000542582	0.00529017
L-Citrulline	174.09	CAK1	YFL029C	-0.078864	0.078864	0.0272064	0.890696	0.936674
L-Asparagine	131.05	CKA2	YOR061W	-0.0785046	0.0785046	-0.555879	0.00213146	0.0146695
dUDP	387	CBK1	YNL161W	-0.0751825	0.0751825	0.211673	0.279558	0.500655
L-Histidine	154.06	TOR1	YJR066W	-0.0740972	0.0740972	-0.245106	0.208707	0.452198
UDP-N-acetyl-D-galactosamine	606.07	YAK1	YJL141C	-0.0718686	0.0718686	-0.231893	0.235074	0.474201
L-Histidine	154.06	MPS1	YDL028C	-0.0718499	0.0718499	-0.160195	0.415471	0.593157
L-Proline	114.06	CKA1	YIL035C	0.0696626	0.0696626	0.507869	0.00579763	0.0271329
L-Citrulline	174.09	CKA1	YIL035C	-0.0688	0.0688	-0.61011	0.000566245	0.00530005
Glycerol 3-phosphate	171.01	CLN2	YPL256C	0.0685052	0.0685052	0.480305	0.00968525	0.0397605
L-Proline	114.06	CDC28	YBR160W	0.0669236	0.0669236	0.0475872	0.809971	0.896107
L-Asparagine	131.05	CKA1	YIL035C	-0.0665335	0.0665335	-0.552563	0.00229495	0.0149172
dUDP	387	MPS1	YDL028C	-0.0663403	0.0663403	0.196385	0.316542	0.529077
Glycerol 3-phosphate	171.01	CDC5	YMR001C	-0.066277	0.066277	-0.191198	0.329745	0.539582
D-Arabinono-1,4-lactone	147.03	CDC5	YMR001C	0.0643613	0.0643613	0.495962	0.00727326	0.0321121
N-Acetyl-L-glutamyl 5-phosphate	268.02	CKB1	YGL019W	-0.0637673	0.0637673	-0.714173	1.9709e-05	0.00122788
L-Proline	114.06	CKA2	YOR061W	0.0606518	0.0606518	0.508373	0.00574129	0.0271329
L-Citrulline	174.09	CKB1	YGL019W	-0.0592335	0.0592335	-0.618854	0.000446974	0.00473161
N-Acetyl-L-glutamyl 5-phosphate	268.02	YAK1	YJL141C	-0.0573922	0.0573922	-0.546224	0.0026377	0.0158262
L-Histidine	154.06	CAK1	YFL029C	-0.057234	0.057234	-0.0742394	0.707329	0.805392
L-Citrulline	174.09	CKB2	YOR039W	-0.0553413	0.0553413	-0.617404	0.000465073	0.00473161
N-Acetyl-L-glutamyl 5-phosphate	268.02	TOR1	YJR066W	-0.0547964	0.0547964	-0.094492	0.63245	0.75698
IMP	347.04	CKA1	YIL035C	-0.0529991	0.0529991	-0.692247	4.47844e-05	0.00139665
L-Proline	114.06	CLB2	YPR119W	-0.050503	0.050503	0.212575	0.277467	0.500655
L-Proline	114.06	CAK1	YFL029C	-0.0500967	0.0500967	-0.0447885	0.820963	0.898864
IMP	347.04	CKA2	YOR061W	-0.0498911	0.0498911	-0.690086	4.83722e-05	0.00139665
dUDP	387	CLB2	YPR119W	0.0492095	0.0492095	-0.265365	0.172323	0.39533
UDP-N-acetyl-D-galactosamine	606.07	TPK1	YJL164C	-0.0479547	0.0479547	-0.456187	0.0146898	0.0572903
D-Arabinono-1,4-lactone	147.03	RIM15	YFL033C	-0.0467516	0.0467516	-0.435747	0.0204586	0.0736511
Xanthine	151.03	MPS1	YDL028C	-0.0454549	0.0454549	-0.28885	0.136027	0.337746
D-Arabinono-1,4-lactone	147.03	CAK1	YFL029C	-0.0438725	0.0438725	-0.210146	0.283123	0.500655
Xanthine	151.03	CBK1	YNL161W	-0.0428714	0.0428714	-0.238904	0.220821	0.468429
N-Acetyl-L-glutamyl 5-phosphate	268.02	CAK1	YFL029C	-0.0425319	0.0425319	0.0313119	0.874322	0.925753
D-Arabinono-1,4-lactone	147.03	YAK1	YJL141C	-0.0425231	0.0425231	-0.427409	0.0232918	0.0767646
gamma-Amino-gamma-cyanobutanoate	127.05	CDC28	YBR160W	-0.0421861	0.0421861	-0.0400796	0.839531	0.909492
Glycerol 3-phosphate	171.01	YAK1	YJL141C	-0.041858	0.041858	-0.0912192	0.644336	0.75698
D-Arabinono-1,4-lactone	147.03	CBK1	YNL161W	0.04169	0.04169	0.417502	0.0270666	0.0867614
L-Histidine	154.06	CKA2	YOR061W	-0.0388691	0.0388691	-0.498021	0.00699749	0.0314887
Xanthine	151.03	RIM15	YFL033C	-0.0382227	0.0382227	-0.0674606	0.733042	0.824672
Glycerol 3-phosphate	171.01	CDC28	YBR160W	0.0381458	0.0381458	0.365555	0.0557544	0.167263
Glycerol 3-phosphate	171.01	MPS1	YDL028C	0.0371343	0.0371343	0.0360675	0.855419	0.914009
L-Citrulline	174.09	TEL1	YBL088C	-0.0370916	0.0370916	-0.444474	0.0178022	0.067396
L-Asparagine	131.05	CKB1	YGL019W	-0.0363226	0.0363226	-0.54357	0.00279379	0.0161918
Xanthine	151.03	TOR1	YJR066W	-0.0357111	0.0357111	-0.276378	0.154538	0.362031
L-Histidine	154.06	CLB2	YPR119W	0.0356552	0.0356552	-0.0471063	0.811858	0.896107
D-Arabinono-1,4-lactone	147.03	CKA2	YOR061W	-0.0352093	0.0352093	-0.465709	0.012505	0.0495963
L-Citrulline	174.09	CDC5	YMR001C	0.0349219	0.0349219	0.149273	0.448372	0.624519
Glycerol 3-phosphate	171.01	CBK1	YNL161W	0.0347695	0.0347695	-0.323011	0.0936263	0.257748
UDP-N-acetyl-D-galactosamine	606.07	TEL1	YBL088C	-0.0347441	0.0347441	-0.402959	0.0334925	0.105909
gamma-Amino-gamma-cyanobutanoate	127.05	PRK1	YIL095W	0.0344445	0.0344445	0.218261	0.264512	0.500655
L-Histidine	154.06	RIM15	YFL033C	-0.0340496	0.0340496	-0.197346	0.314132	0.528827
L-Histidine	154.06	CLN2	YPL256C	-0.0329266	0.0329266	0.174581	0.374256	0.577377
L-Histidine	154.06	CKB2	YOR039W	-0.0324697	0.0324697	-0.513622	0.00518112	0.025258
L-Citrulline	174.09	CLB2	YPR119W	0.03188	0.03188	-0.0445154	0.822038	0.898864
L-Histidine	154.06	CKB1	YGL019W	-0.0318515	0.0318515	-0.515564	0.00498595	0.0248237
N-Acetyl-L-glutamyl 5-phosphate	268.02	CDC5	YMR001C	0.0316054	0.0316054	0.170299	0.386266	0.588523
Glycerol 3-phosphate	171.01	RIM15	YFL033C	0.0303312	0.0303312	0.230093	0.238832	0.477663
Shikimate 5-phosphate	253.01	CLB2	YPR119W	-0.0291864	0.0291864	-0.522965	0.00429849	0.0218662
L-Proline	114.06	PRK1	YIL095W	-0.0286586	0.0286586	-0.38917	0.0406679	0.125214
L-Asparagine	131.05	CKB2	YOR039W	-0.0284012	0.0284012	-0.542089	0.00288429	0.0161918
IMP	347.04	MPS1	YDL028C	-0.0271434	0.0271434	0.307219	0.111775	0.290615
L-Histidine	154.06	CKA1	YIL035C	-0.0264639	0.0264639	-0.493498	0.00761512	0.0329988
L-Histidine	154.06	MEC1	YBR136W	-0.0243606	0.0243606	-0.277194	0.153274	0.362031
D-Arabinono-1,4-lactone	147.03	TPK1	YJL164C	-0.0236609	0.0236609	0.0919356	0.641727	0.75698
D-Arabinono-1,4-lactone	147.03	CKA1	YIL035C	-0.0232819	0.0232819	-0.46681	0.0122709	0.0495067
Glycerol 3-phosphate	171.01	CAK1	YFL029C	-0.0232441	0.0232441	0.0056482	0.977243	0.981438
N-Acetyl-L-glutamyl 5-phosphate	268.02	PRK1	YIL095W	0.0231093	0.0231093	0.269162	0.166037	0.384679
IMP	347.04	CBK1	YNL161W	-0.0230819	0.0230819	0.198454	0.311367	0.52797
Xanthine	151.03	PRK1	YIL095W	0.0229359	0.0229359	0.143888	0.465095	0.632746
N-Acetyl-L-glutamyl 5-phosphate	268.02	TPK1	YJL164C	0.0221631	0.0221631	0.419513	0.0262625	0.085353
N-Acetyl-L-glutamyl 5-phosphate	268.02	CKA1	YIL035C	-0.0220674	0.0220674	-0.684415	5.90363e-05	0.00139665
IMP	347.04	TEL1	YBL088C	0.0213477	0.0213477	-0.324604	0.0919275	0.256084
L-Citrulline	174.09	MPS1	YDL028C	-0.0212778	0.0212778	0.0975245	0.621516	0.749664
dUDP	387	TEL1	YBL088C	0.0207937	0.0207937	-0.200207	0.307026	0.52797
Xanthine	151.03	CAK1	YFL029C	-0.0205577	0.0205577	-0.119626	0.544298	0.683461
N-Acetyl-L-glutamyl 5-phosphate	268.02	MPS1	YDL028C	-0.0205416	0.0205416	0.129906	0.509986	0.667072
Glycerol 3-phosphate	171.01	TOR1	YJR066W	0.0204095	0.0204095	0.167313	0.394773	0.588523
D-Arabinono-1,4-lactone	147.03	CLB2	YPR119W	-0.0203698	0.0203698	-0.120766	0.540442	0.683461
dUDP	387	MEC1	YBR136W	0.0198924	0.0198924	-0.198709	0.310733	0.52797
L-Histidine	154.06	TPK1	YJL164C	0.019795	0.019795	0.211097	0.280899	0.500655
IMP	347.04	TPK1	YJL164C	0.0193367	0.0193367	0.437331	0.0199535	0.0729551
L-Citrulline	174.09	MEC1	YBR136W	-0.0186336	0.0186336	-0.430001	0.0223787	0.0750062
gamma-Amino-gamma-cyanobutanoate	127.05	MPS1	YDL028C	-0.0185046	0.0185046	0.130728	0.507289	0.667072
gamma-Amino-gamma-cyanobutanoate	127.05	CLB2	YPR119W	-0.0183901	0.0183901	-0.288081	0.137119	0.337746
L-Histidine	154.06	PRK1	YIL095W	0.0181903	0.0181903	0.258099	0.184818	0.407995
Shikimate 5-phosphate	253.01	CAK1	YFL029C	-0.0180159	0.0180159	-0.174528	0.374404	0.577377
UDP-N-acetyl-D-galactosamine	606.07	CKA2	YOR061W	-0.017909	0.017909	-0.279536	0.14969	0.362031
N-Acetyl-L-glutamyl 5-phosphate	268.02	CKA2	YOR061W	-0.0164232	0.0164232	-0.684298	5.92769e-05	0.00139665
L-Asparagine	131.05	MPS1	YDL028C	-0.0142262	0.0142262	-0.187031	0.340591	0.551459
Xanthine	151.03	CLB2	YPR119W	-0.0128425	0.0128425	-0.29541	0.126964	0.322929
D-Arabinono-1,4-lactone	147.03	TOR1	YJR066W	0.0124398	0.0124398	0.380997	0.0454676	0.138174
L-Citrulline	174.09	CDC28	YBR160W	-0.0119535	0.0119535	0.162933	0.407439	0.588523
dUDP	387	CLN2	YPL256C	-0.011874	0.011874	0.107849	0.584885	0.724975
Glycerol 3-phosphate	171.01	CKB2	YOR039W	0.0117559	0.0117559	-0.0826095	0.67601	0.779724
Glycerol 3-phosphate	171.01	CLB2	YPR119W	-0.0107898	0.0107898	0.0904914	0.646991	0.75698
IMP	347.04	CLB2	YPR119W	0.0107519	0.0107519	-0.233461	0.231834	0.471731
D-Arabinono-1,4-lactone	147.03	MPS1	YDL028C	0.0104367	0.0104367	0.167061	0.395494	0.588523
L-Asparagine	131.05	TEL1	YBL088C	-0.0103775	0.0103775	-0.253668	0.192741	0.421509
Xanthine	151.03	CKB1	YGL019W	-0.0102897	0.0102897	-0.327563	0.0888328	0.253499
UDP-N-acetyl-D-galactosamine	606.07	CKA1	YIL035C	-0.00999904	0.00999904	-0.276265	0.154714	0.362031
dUDP	387	PRK1	YIL095W	0.00987561	0.00987561	0.299447	0.121609	0.31271
UDP-N-acetyl-D-galactosamine	606.07	CDC5	YMR001C	-0.00987144	0.00987144	-0.167476	0.394306	0.588523
L-Asparagine	131.05	TPK1	YJL164C	0.00981939	0.00981939	0.163914	0.404583	0.588523
Xanthine	151.03	CDC5	YMR001C	0.00980398	0.00980398	0.12895	0.513132	0.667072
L-Asparagine	131.05	RIM15	YFL033C	-0.00970432	0.00970432	-0.192176	0.32723	0.539582
gamma-Amino-gamma-cyanobutanoate	127.05	CLN2	YPL256C	-0.00966216	0.00966216	0.160112	0.415717	0.593157
L-Asparagine	131.05	PRK1	YIL095W	0.00965493	0.00965493	0.126388	0.521608	0.674344
Shikimate 5-phosphate	253.01	MPS1	YDL028C	0.00962399	0.00962399	0.146475	0.457021	0.632746
L-Citrulline	174.09	CBK1	YNL161W	-0.00923338	0.00923338	0.012094	0.951296	0.96784
L-Histidine	154.06	CBK1	YNL161W	-0.00864024	0.00864024	-0.0336432	0.865046	0.920094
Xanthine	151.03	TEL1	YBL088C	0.00835246	0.00835246	-0.073791	0.70902	0.805392
UDP-N-acetyl-D-galactosamine	606.07	RIM15	YFL033C	-0.00814593	0.00814593	0.19933	0.309194	0.52797
L-Asparagine	131.05	MEC1	YBR136W	-0.0077832	0.0077832	-0.2395	0.219637	0.468429
L-Histidine	154.06	CDC5	YMR001C	0.00776729	0.00776729	0.186603	0.341716	0.551459
gamma-Amino-gamma-cyanobutanoate	127.05	TEL1	YBL088C	-0.00764656	0.00764656	-0.238211	0.222204	0.468429
D-Arabinono-1,4-lactone	147.03	TEL1	YBL088C	-0.00751539	0.00751539	-0.163099	0.406954	0.588523
Shikimate 5-phosphate	253.01	CKB2	YOR039W	-0.00739868	0.00739868	-0.432026	0.0216858	0.0750062
dUDP	387	CAK1	YFL029C	0.00722402	0.00722402	0.11907	0.546184	0.683461
Xanthine	151.03	CDC28	YBR160W	0.00705513	0.00705513	0.158815	0.419553	0.594366
L-Proline	114.06	TEL1	YBL088C	0.00648956	0.00648956	0.174296	0.375049	0.577377
Shikimate 5-phosphate	253.01	CKB1	YGL019W	-0.00642607	0.00642607	-0.43105	0.0220177	0.0750062
N-Acetyl-L-glutamyl 5-phosphate	268.02	MEC1	YBR136W	0.0061751	0.0061751	-0.175087	0.372851	0.577377
L-Citrulline	174.09	PRK1	YIL095W	0.00605161	0.00605161	0.0880115	0.656069	0.763782
IMP	347.04	CDC28	YBR160W	0.00581564	0.00581564	0.128993	0.51299	0.667072
L-Proline	114.06	MEC1	YBR136W	0.00526426	0.00526426	0.174296	0.375048	0.577377
Xanthine	151.03	CKB2	YOR039W	-0.00509948	0.00509948	-0.326333	0.0901101	0.254045
UDP-N-acetyl-D-galactosamine	606.07	CLB2	YPR119W	-0.00508181	0.00508181	-0.13482	0.49397	0.656755
L-Histidine	154.06	TEL1	YBL088C	-0.00502232	0.00502232	-0.278988	0.150523	0.362031
IMP	347.04	MEC1	YBR136W	0.00485572	0.00485572	-0.315153	0.102356	0.272174
gamma-Amino-gamma-cyanobutanoate	127.05	MEC1	YBR136W	0.00428644	0.00428644	-0.226885	0.245624	0.481182
UDP-N-acetyl-D-galactosamine	606.07	TOR1	YJR066W	0.00427835	0.00427835	-0.0506634	0.79793	0.889122
UDP-N-acetyl-D-galactosamine	606.07	MPS1	YDL028C	-0.00418508	0.00418508	-0.334384	0.0820017	0.236894
Glycerol 3-phosphate	171.01	CKA2	YOR061W	-0.00400228	0.00400228	-0.137983	0.483796	0.646905
L-Asparagine	131.05	CDC28	YBR160W	-0.00389653	0.00389653	-0.00158297	0.993621	0.993621
IMP	347.04	CAK1	YFL029C	0.00383867	0.00383867	0.234538	0.229627	0.471731
Shikimate 5-phosphate	253.01	PRK1	YIL095W	-0.00378122	0.00378122	-0.165246	0.400721	0.588523
L-Asparagine	131.05	CLN2	YPL256C	0.00367805	0.00367805	0.21229	0.278127	0.500655
Glycerol 3-phosphate	171.01	CKB1	YGL019W	0.00360628	0.00360628	-0.0824969	0.676428	0.779724
Glycerol 3-phosphate	171.01	CKA1	YIL035C	-0.00330383	0.00330383	-0.139263	0.47971	0.646905
Glycerol 3-phosphate	171.01	TEL1	YBL088C	-0.00327372	0.00327372	-0.288828	0.136058	0.337746
D-Arabinono-1,4-lactone	147.03	CDC28	YBR160W	-0.00324463	0.00324463	0.0267189	0.892643	0.936674
N-Acetyl-L-glutamyl 5-phosphate	268.02	TEL1	YBL088C	0.00321774	0.00321774	-0.191691	0.328474	0.539582
Shikimate 5-phosphate	253.01	CKA2	YOR061W	-0.00309877	0.00309877	-0.432159	0.021641	0.0750062
Xanthine	151.03	TPK1	YJL164C	-0.00290093	0.00290093	0.0924719	0.639777	0.75698
Shikimate 5-phosphate	253.01	TPK1	YJL164C	-0.00279315	0.00279315	0.101836	0.606105	0.736722
UDP-N-acetyl-D-galactosamine	606.07	CDC28	YBR160W	0.00270466	0.00270466	0.143998	0.46475	0.632746
D-Arabinono-1,4-lactone	147.03	CLN2	YPL256C	0.00233269	0.00233269	0.101405	0.607638	0.736722
Xanthine	151.03	CLN2	YPL256C	-0.00219476	0.00219476	0.225508	0.248577	0.481182
Shikimate 5-phosphate	253.01	YAK1	YJL141C	-0.00208478	0.00208478	-0.214489	0.273061	0.500655
L-Citrulline	174.09	TPK1	YJL164C	0.00187531	0.00187531	0.091634	0.642825	0.75698
IMP	347.04	CLN2	YPL256C	-0.00175064	0.00175064	0.179379	0.361059	0.577377
D-Arabinono-1,4-lactone	147.03	CKB1	YGL019W	-0.00155274	0.00155274	-0.444283	0.0178571	0.067396
Shikimate 5-phosphate	253.01	CKA1	YIL035C	-0.00136411	0.00136411	-0.429831	0.0224378	0.0750062
Xanthine	151.03	MEC1	YBR136W	-0.00133341	0.00133341	-0.0583134	0.768186	0.860075
N-Acetyl-L-glutamyl 5-phosphate	268.02	CLN2	YPL256C	-0.00127256	0.00127256	0.236741	0.225154	0.47041
L-Citrulline	174.09	CLN2	YPL256C	0.000949114	0.000949114	0.233697	0.231349	0.471731
IMP	347.04	PRK1	YIL095W	-0.000834067	0.000834067	0.163714	0.405165	0.588523
UDP-N-acetyl-D-galactosamine	606.07	MEC1	YBR136W	-0.000742633	0.000742633	-0.362436	0.0580376	0.171065
L-Histidine	154.06	CDC28	YBR160W	-0.000574963	0.000574963	0.209533	0.28456	0.500655
Shikimate 5-phosphate	253.01	RIM15	YFL033C	-0.000532701	0.000532701	-0.213785	0.274675	0.500655
Shikimate 5-phosphate	253.01	CDC5	YMR001C	-0.000514715	0.000514715	-0.0676622	0.732273	0.824672
D-Arabinono-1,4-lactone	147.03	PRK1	YIL095W	0.000442644	0.000442644	0.0213954	0.913945	0.950503
Glycerol 3-phosphate	171.01	MEC1	YBR136W	0.000408679	0.000408679	-0.260904	0.179923	0.404827
D-Arabinono-1,4-lactone	147.03	MEC1	YBR136W	-0.000256911	0.000256911	-0.153923	0.434198	0.608398
N-Acetyl-L-glutamyl 5-phosphate	268.02	CDC28	YBR160W	-0.000249376	0.000249376	0.123582	0.530967	0.682672
Shikimate 5-phosphate	253.01	TEL1	YBL088C	0.000227893	0.000227893	-0.00641544	0.974153	0.981438
Xanthine	151.03	CKA1	YIL035C	-0.000167039	0.000167039	-0.312762	0.10513	0.276409
Shikimate 5-phosphate	253.01	CLN2	YPL256C	-0.000156866	0.000156866	0.121559	0.537765	0.683461
N-Acetyl-L-glutamyl 5-phosphate	268.02	CBK1	YNL161W	-8.86776e-05	8.86776e-05	0.145404	0.460353	0.632746
Xanthine	151.03	CKA2	YOR061W	-6.58256e-07	6.58256e-07	-0.315191	0.102313	0.272174
D-Arabinono-1,4-lactone	147.03	CKB2	YOR039W	0	0	-0.442133	0.0184853	0.0686596
N-Acetyl-L-glutamyl 5-phosphate	268.02	CLB2	YPR119W	0	0	-0.222917	0.254201	0.487565
Shikimate 5-phosphate	253.01	CBK1	YNL161W	0	0	-0.078945	0.68966	0.791081
UDP-N-acetyl-D-galactosamine	606.07	CKB1	YGL019W	0	0	-0.225397	0.248816	0.481182
Shikimate 5-phosphate	253.01	TOR1	YJR066W	0	0	0.105361	0.593627	0.72817
L-Asparagine	131.05	CLB2	YPR119W	0	0	-0.163743	0.405079	0.588523
Shikimate 5-phosphate	253.01	MEC1	YBR136W	0	0	0.0166518	0.932976	0.957528
L-Asparagine	131.05	CBK1	YNL161W	0	0	-0.0182333	0.926627	0.955201
L-Asparagine	131.05	TOR1	YJR066W	0	0	0.01442	0.941943	0.962509
UDP-N-acetyl-D-galactosamine	606.07	CKB2	YOR039W	0	0	-0.225604	0.248371	0.481182
Shikimate 5-phosphate	253.01	CDC28	YBR160W	0	0	-0.2147	0.272577	0.500655
